# Supplementary material for: Levulinate amidinium protic ionic liquids (PILs) as suitable media for the dissolution and levulination of cellulose
Source: Royal Society of Chemistry journal article supplement (doi:10.1039/c9nj00191c), 2019-01-01

## SUPPORTING PILs

### Levulinate amidinium protic ionic liquids (PILs) as suitable media for the dissolution and levulination of cellulose

Stefano Becherini, <sup>[a]</sup> Andrea Mezzetta, <sup>[a]</sup> Cinzia Chiappe, <sup>[a]</sup> and Lorenzo Guazzelli, <sup>\*[a]</sup>

### *Supporting Information*

#### *Table of contents*

|                                                                                      |                       |
|--------------------------------------------------------------------------------------|-----------------------|
| <sup>1</sup> H- and <sup>13</sup> C-NMR spectra of Lev PILs                          | pages <b>S2-S5</b>    |
| IR spectra of Lev PILs                                                               | pages <b>S6-S7</b>    |
| Thermal gravimetric analysis (TGA) of Lev PILs                                       | pages <b>S8-S9</b>    |
| Images of dissolved MCC in Lev PILs at maximum wt%                                   | page <b>S10</b>       |
| Optical microscopy of dissolved MCC in Lev PILs at maximum wt%                       | pages <b>S11- S12</b> |
| IR spectra of pristine MCC and regenerated cellulose after dissolution in Lev (P)ILs | pages <b>S13-S15</b>  |
| <sup>1</sup> H- and <sup>13</sup> C-NMR spectra of Levulinic Anhydride               | pages <b>S16-S17</b>  |
| IR spectra of cellulose after levulination reaction                                  | pages <b>S18-S33</b>  |
| <sup>1</sup> H-NMR of propionyl-levulinyl cellulose                                  | pages <b>S34-S49</b>  |

---

[a] Dr A. Mezzetta, Mr S. Becherini, Prof. C. Chiappe, Dr L. Guazzelli  
Department of Pharmacy  
University of Pisa  
Via Bonanno 6, Pisa (Italy)  
\*E-mail: lorenzo.guazzelli@unipi.it

Fig S1.  $^1\text{H}$  NMR of DBUHLev at 25 °C

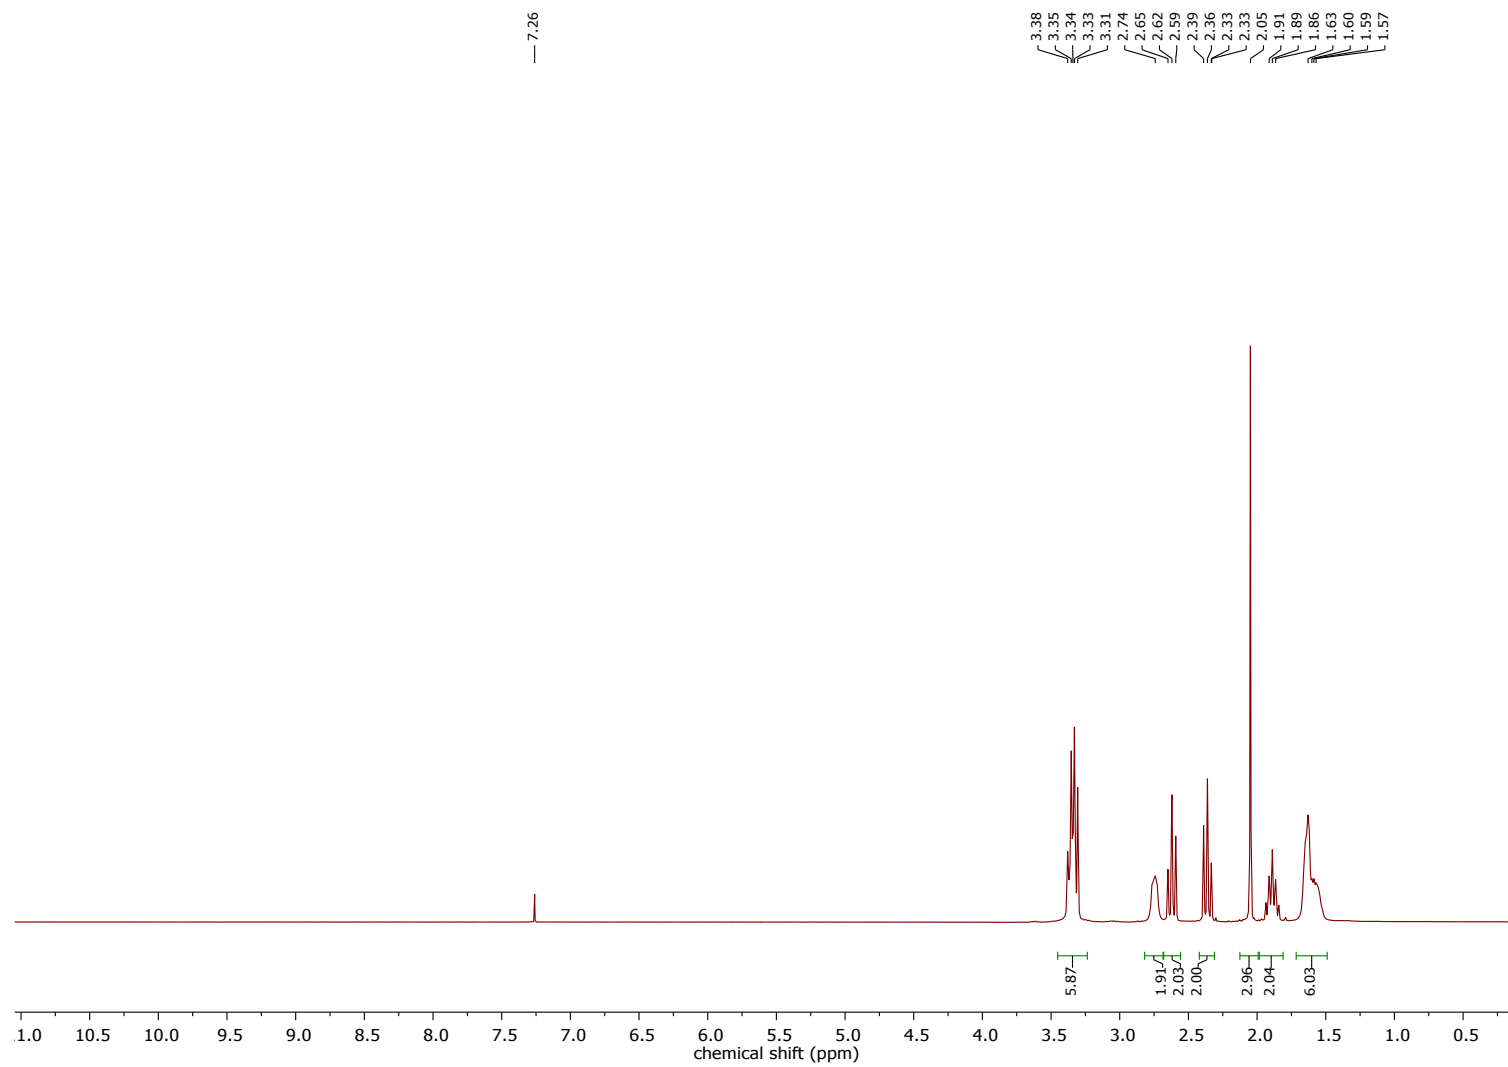

Fig S2.  $^{13}\text{C}$  NMR of DBUHLev at 25 °C

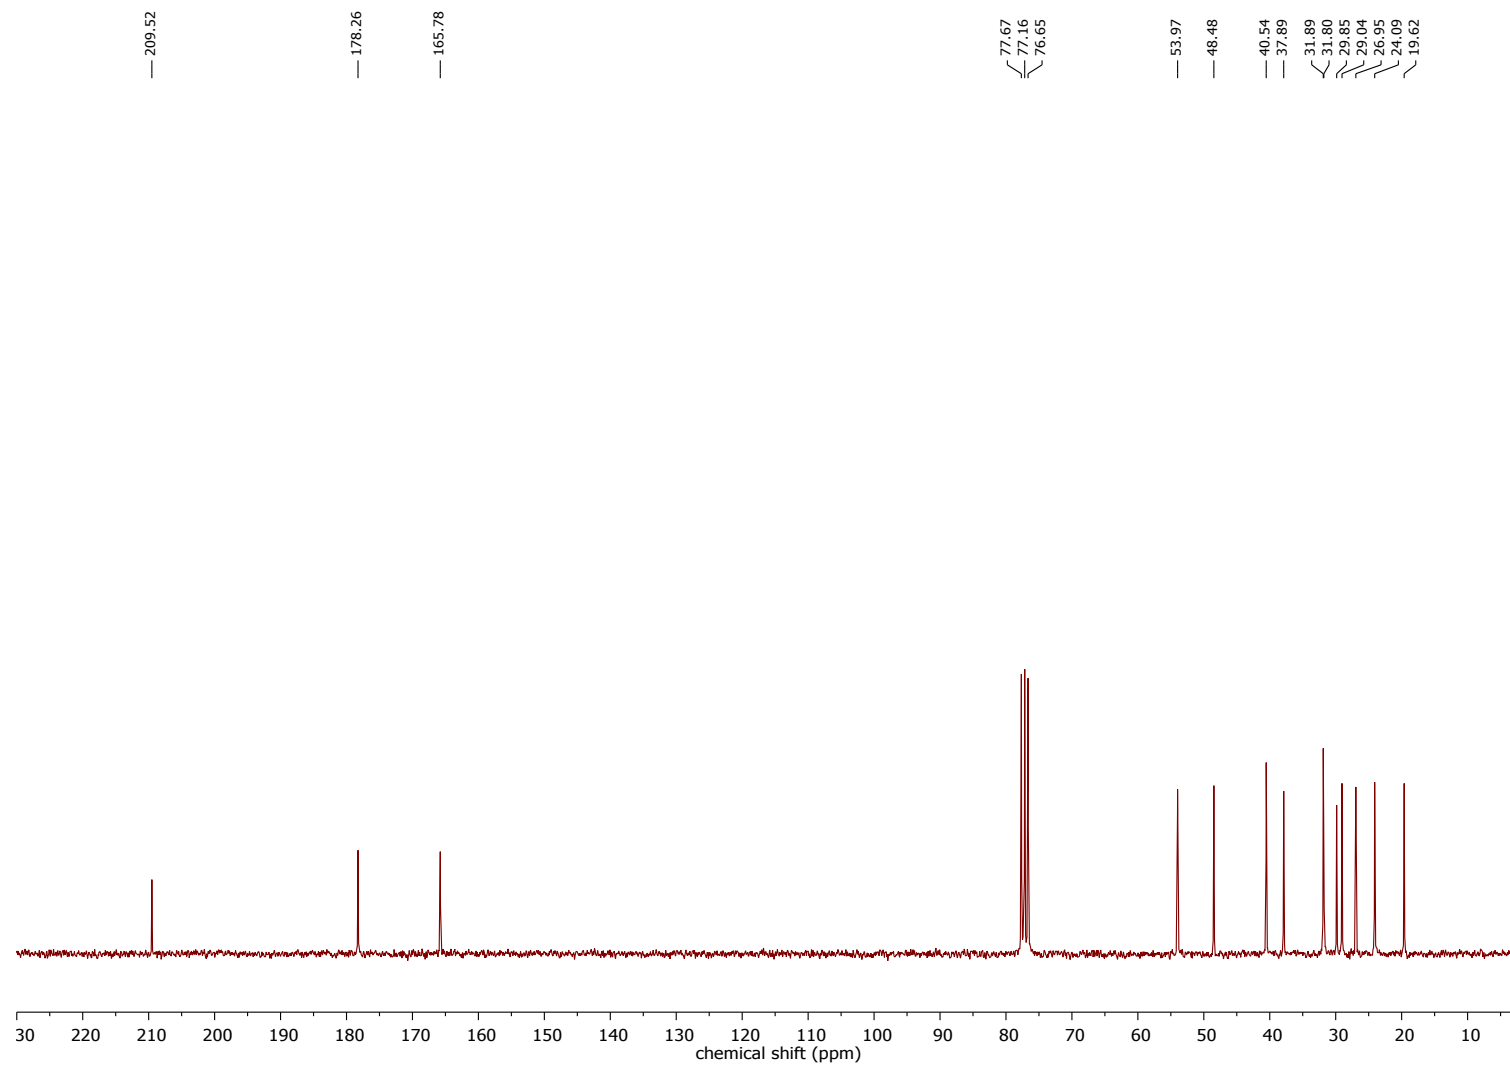

Fig S3.  $^1\text{H}$  NMR of DBNHLev at 25 °C

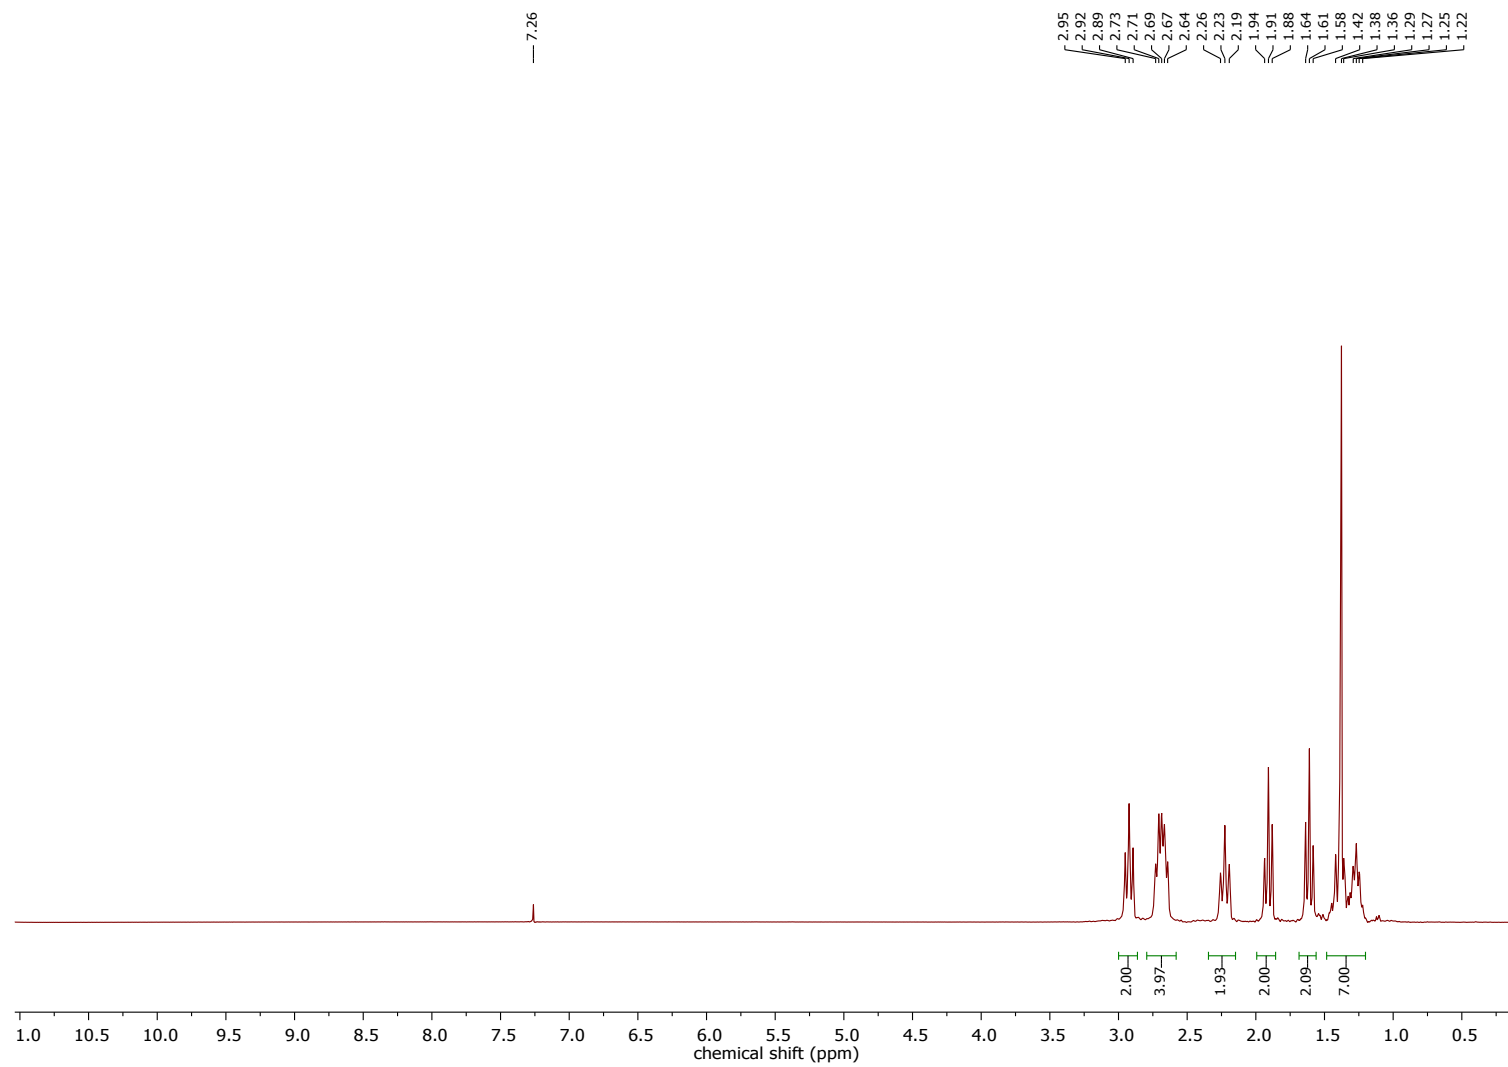

Fig S4.  $^{13}\text{C}$  NMR of DBNHLev at 25 °C

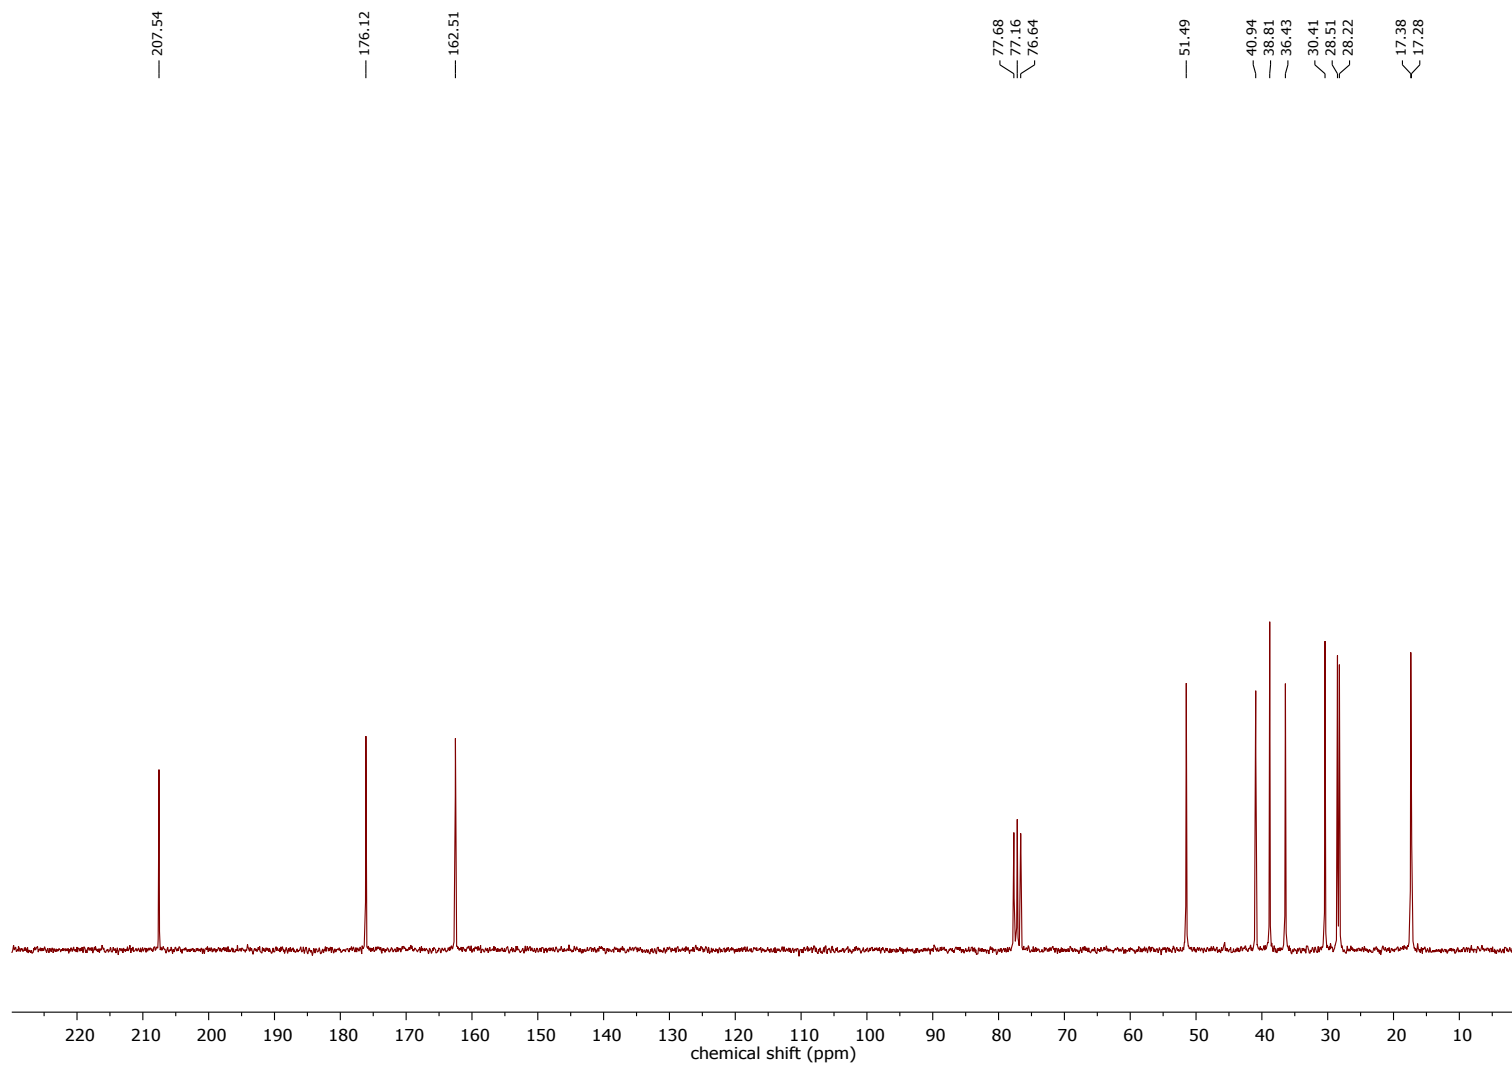

Fig S5. IR of DBUHLev at 25 °C

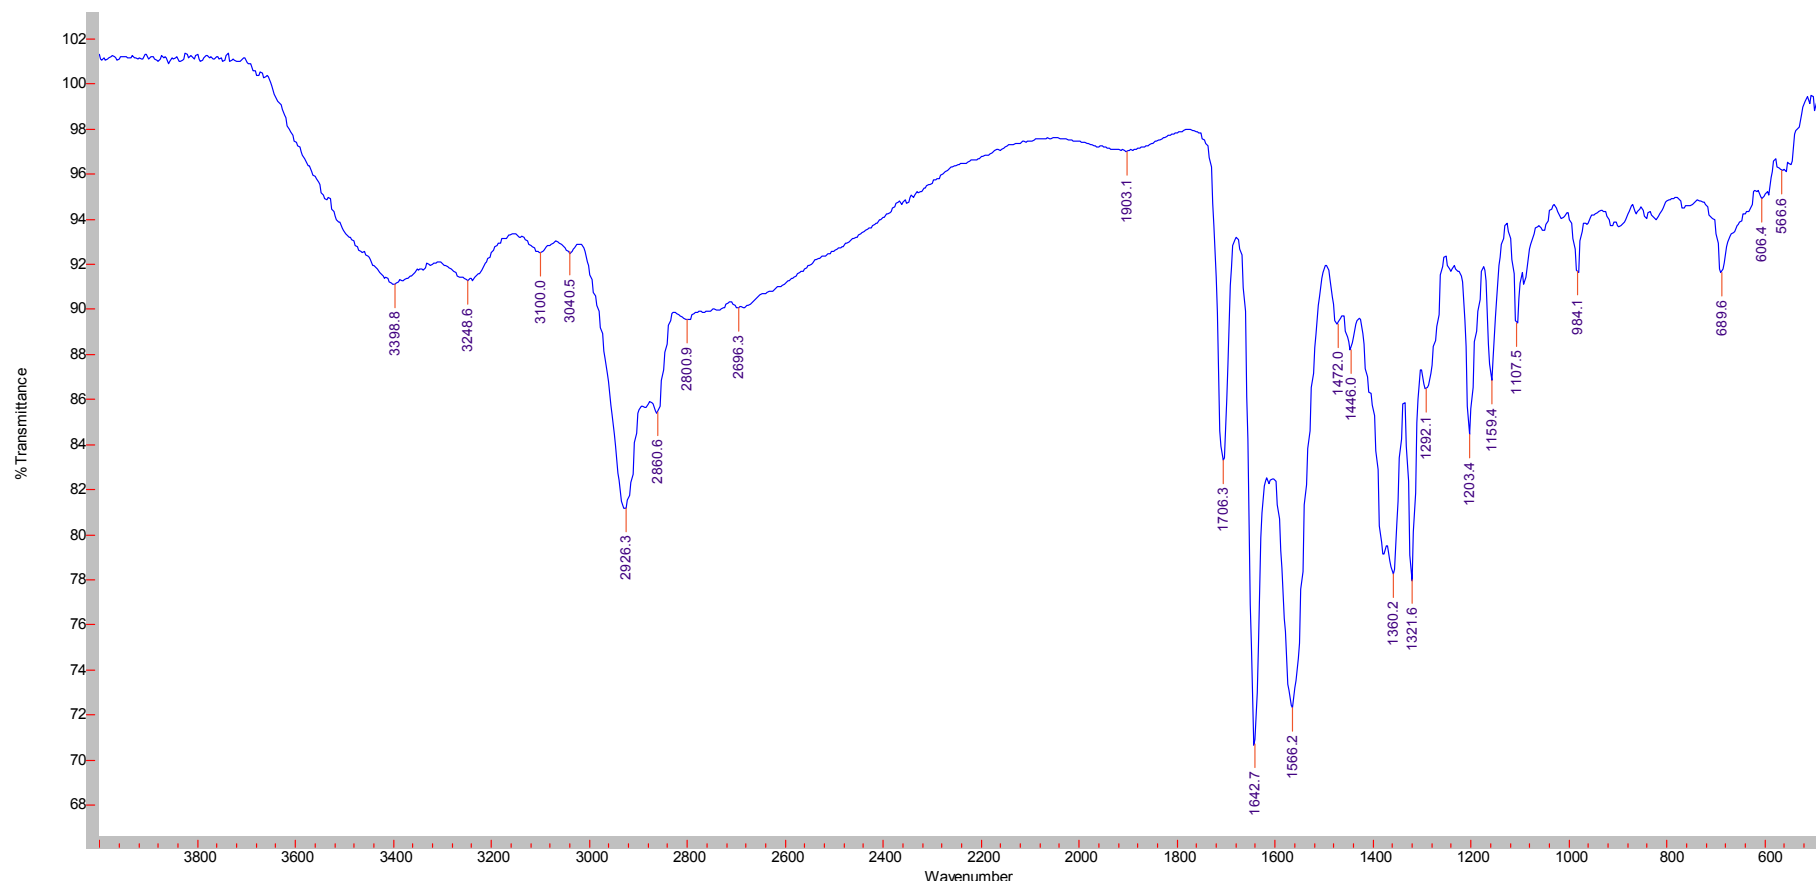

Fig S6. IR of DBNHLev at 25 °C

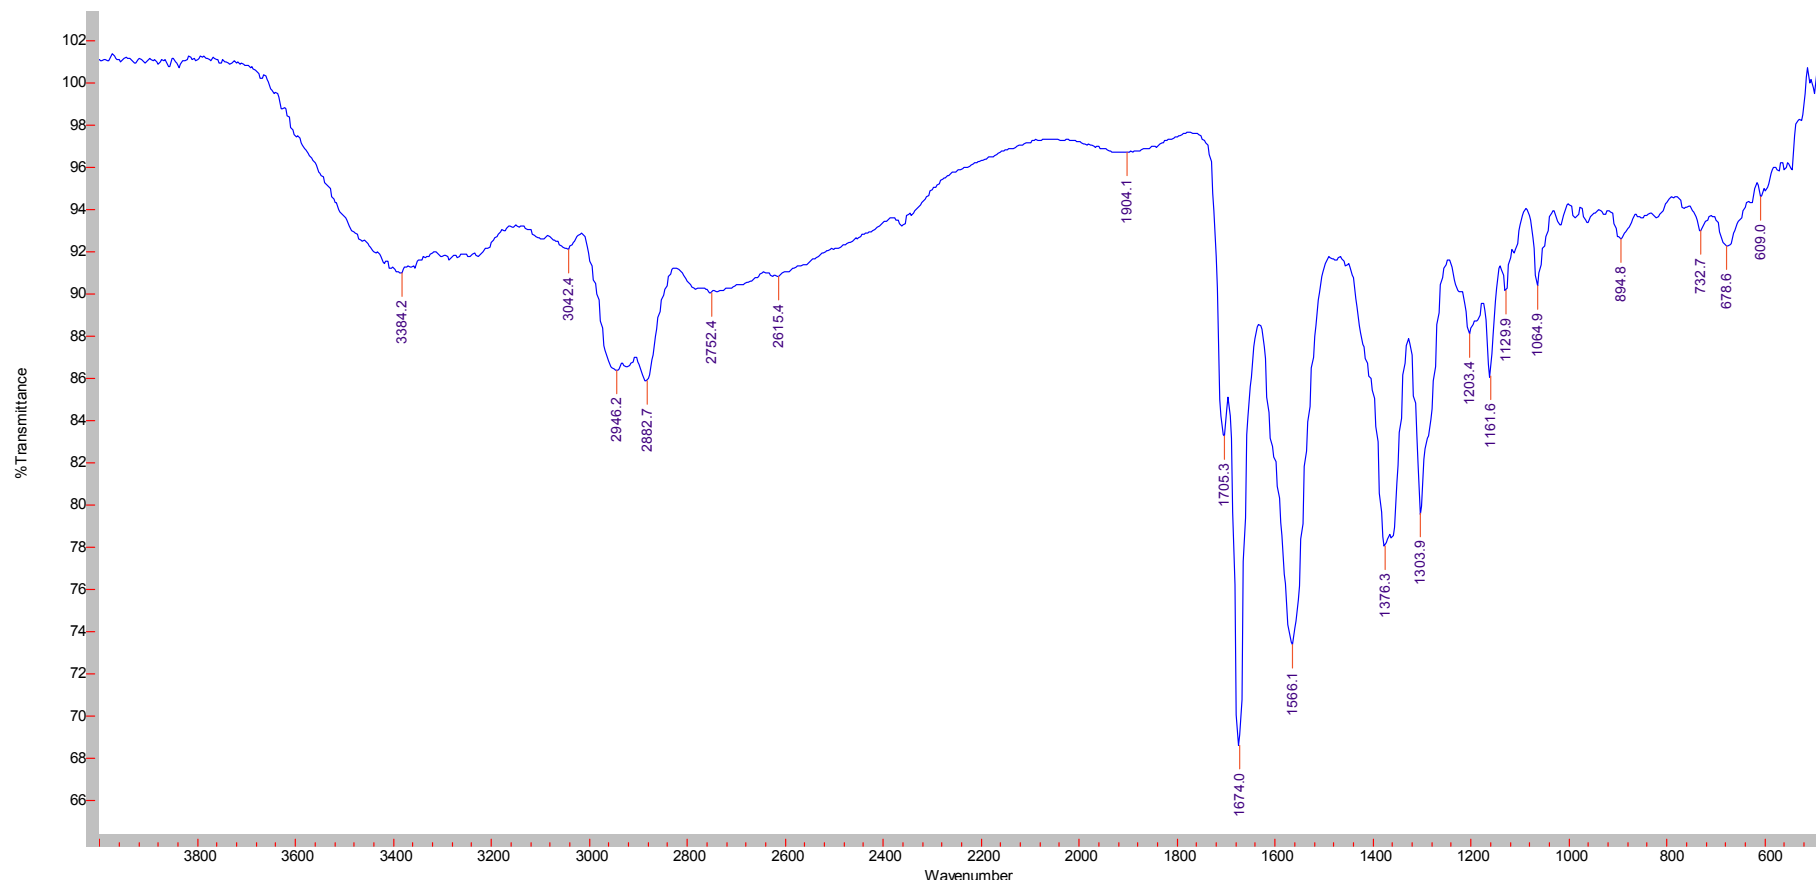

**Fig S7.** Thermal gravimetric analysis (TGA) of **DBUHLev**

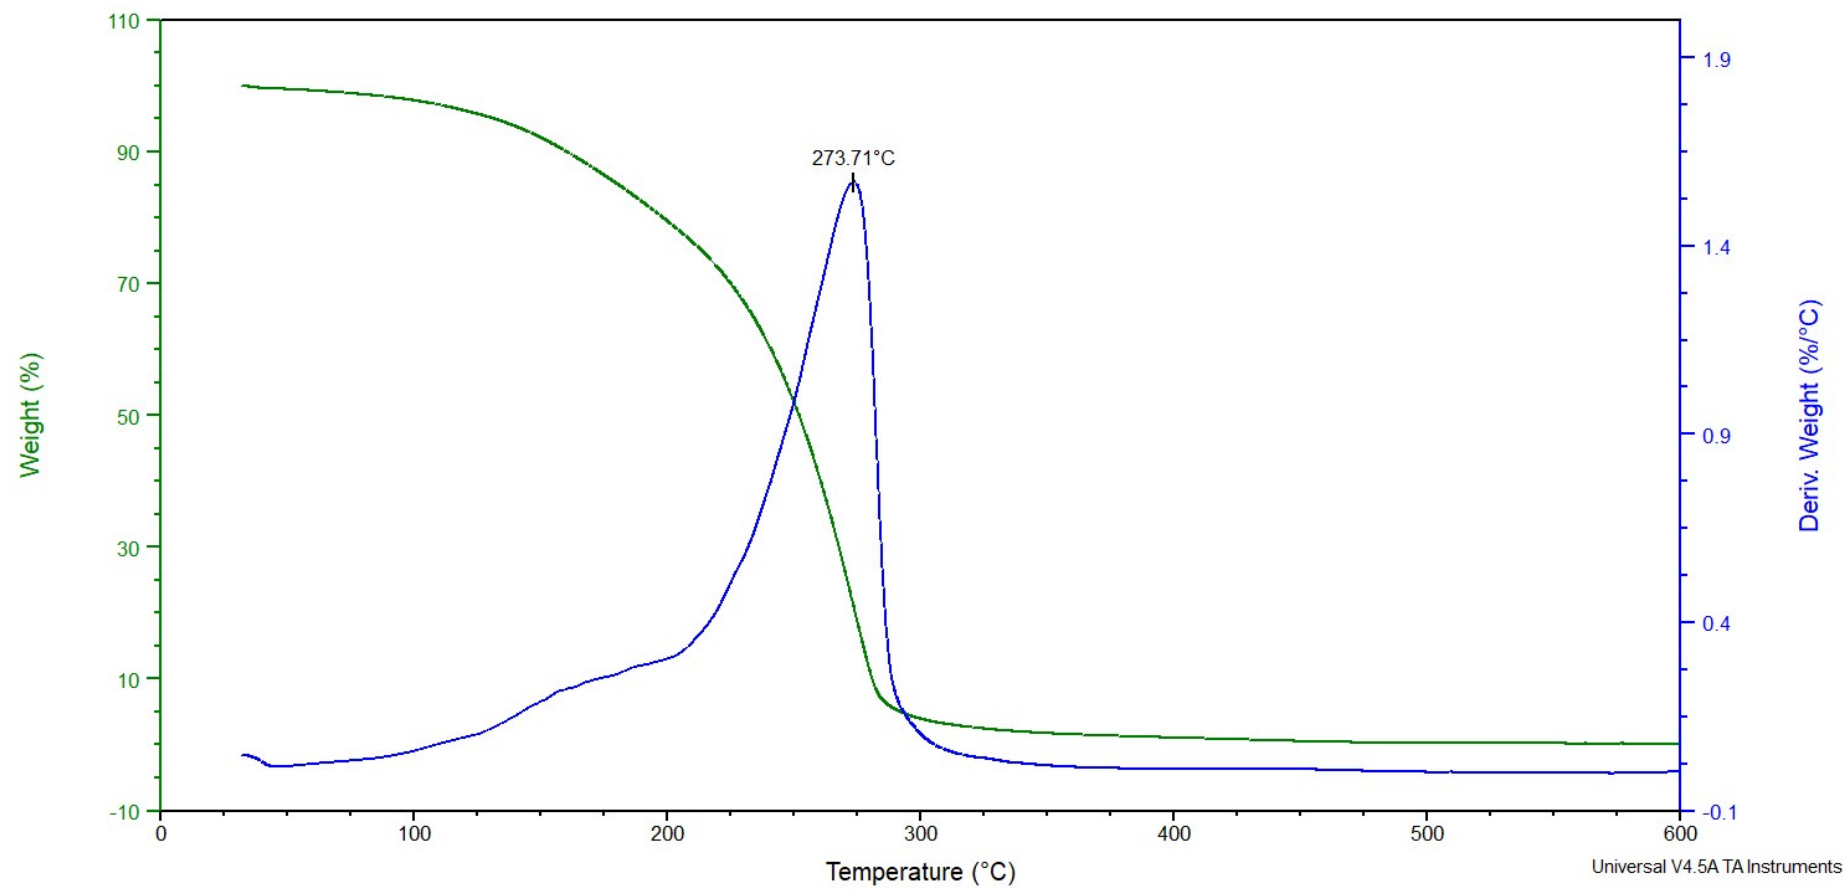



**Fig S8.** Thermal gravimetric analysis (TGA) of **DBNHLev**

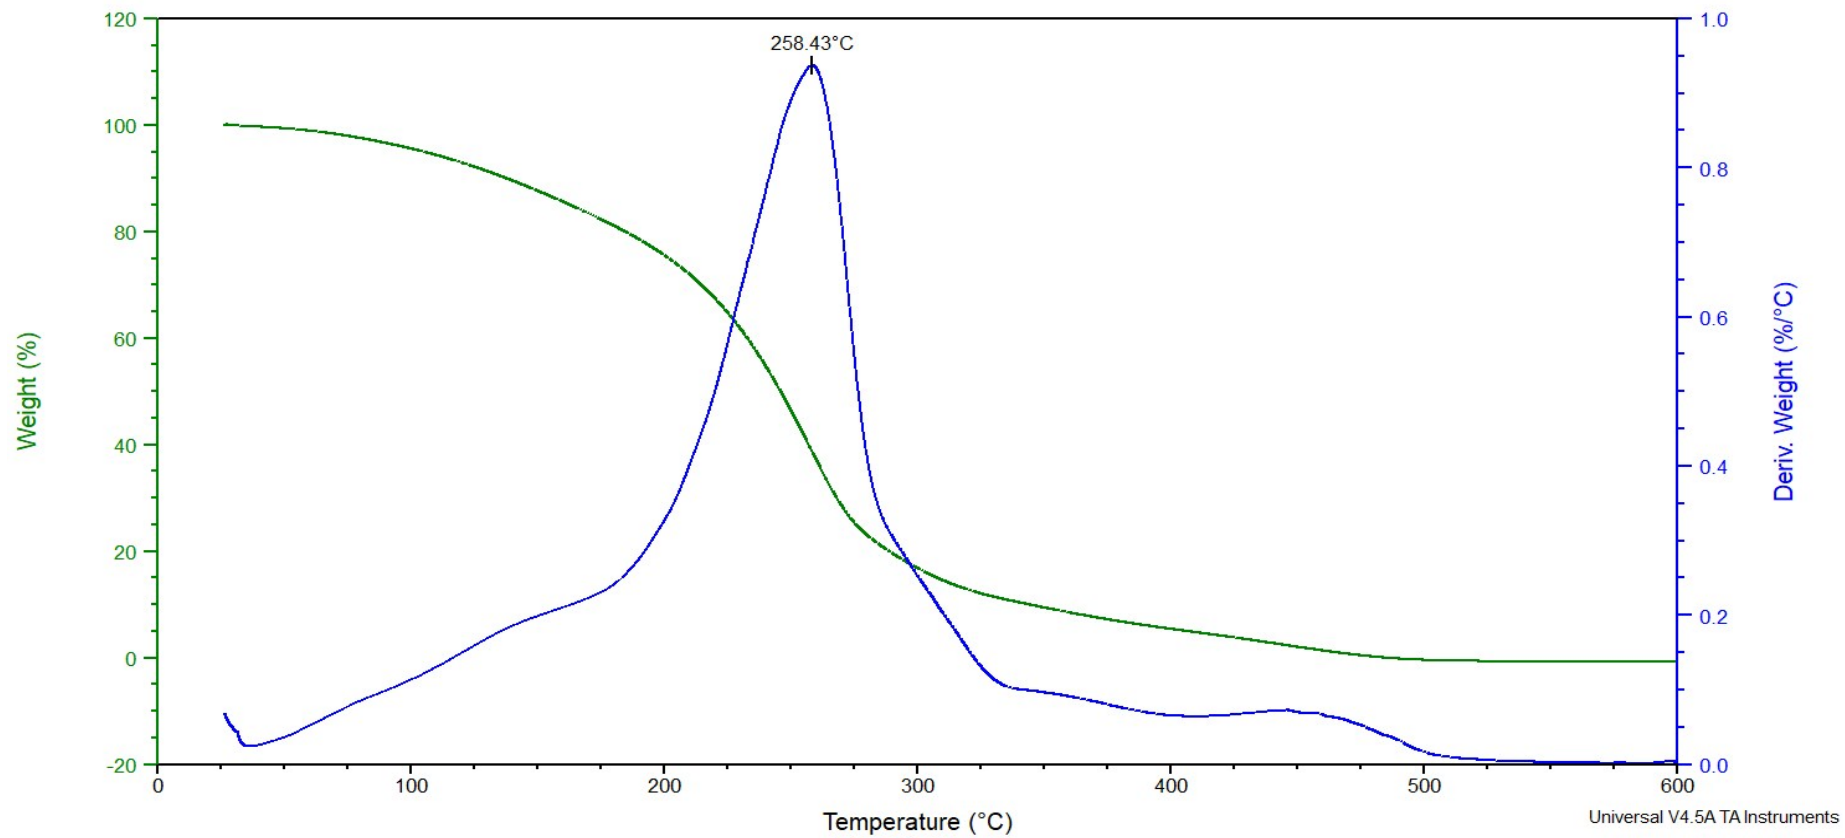

**Fig S9.** Pictures of dissolved MCC in **DBUHLev**: 80 °C, 12.5 wt% (A); 100 °C, 15 wt%(B)

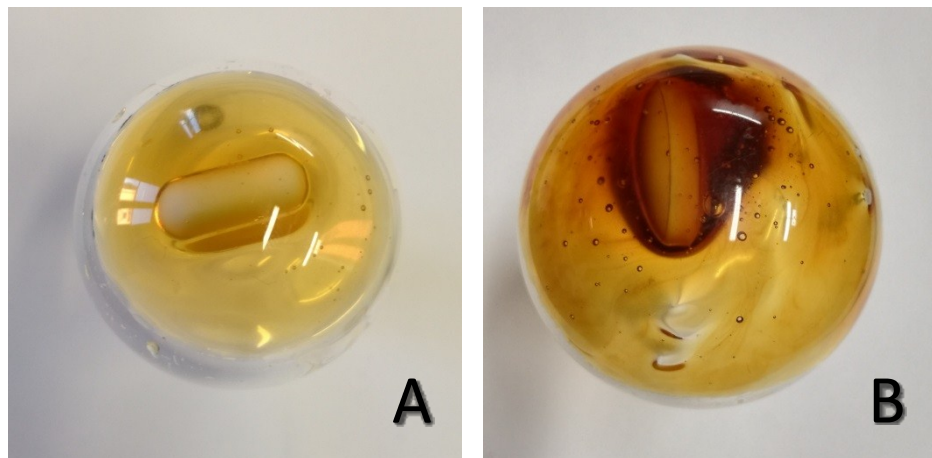

**Fig S10.** Pictures of dissolved MCC in **DBNHLev**: 60 °C, 12 wt% (A); 80 °C, 16 wt% (B); 100 °C, 20 wt%(C)

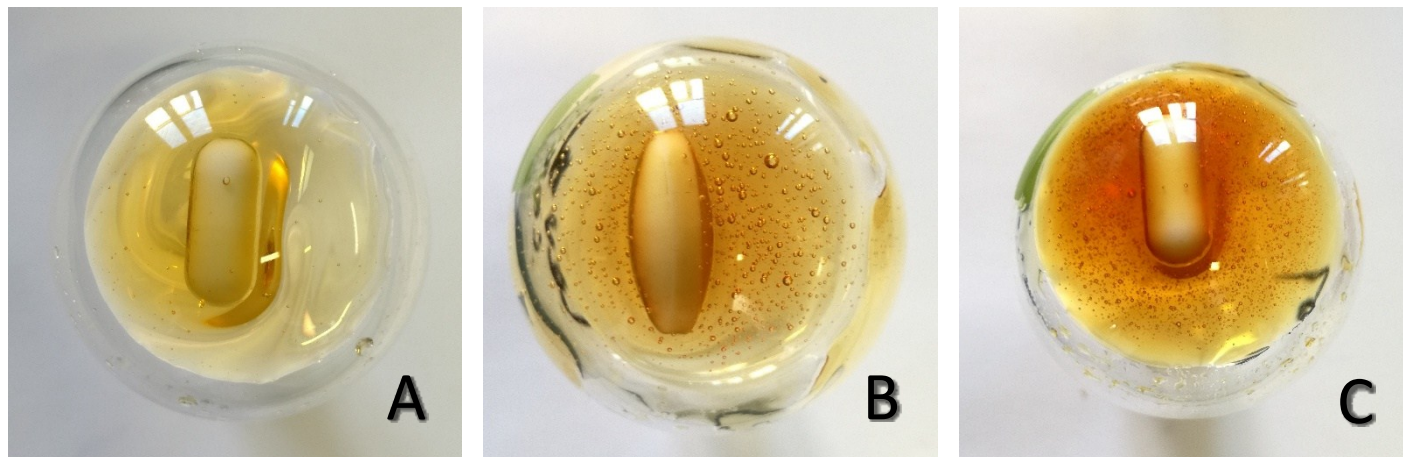

**Fig S11.** Optical microscopy of microcrystalline cellulose dissolved in **DBNHLev** (100 °C, 20 wt%), 4x(**A**) and 15x (**B**)

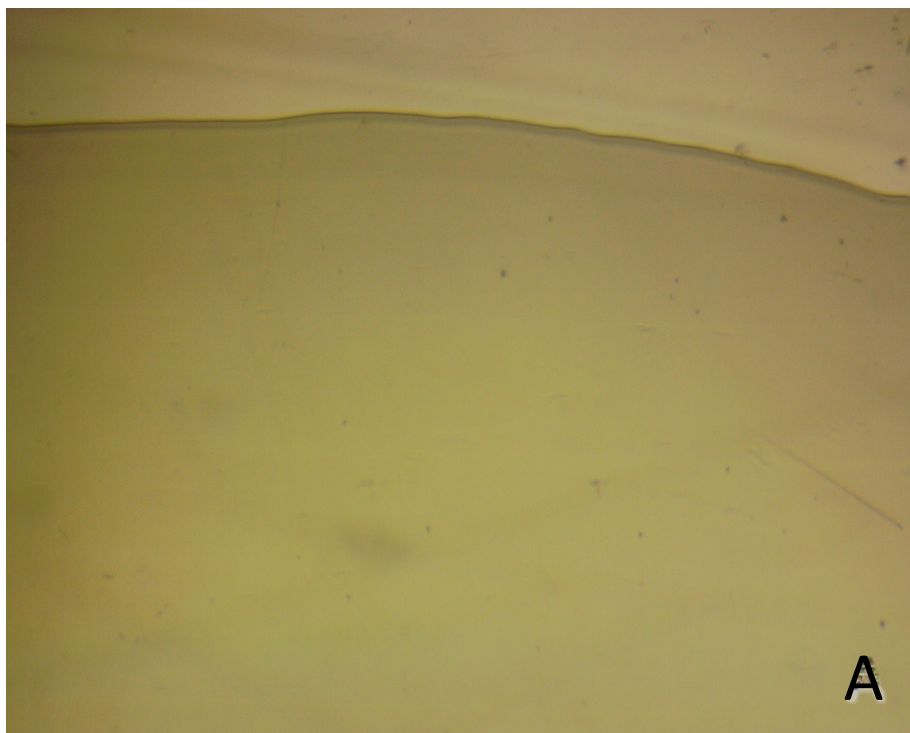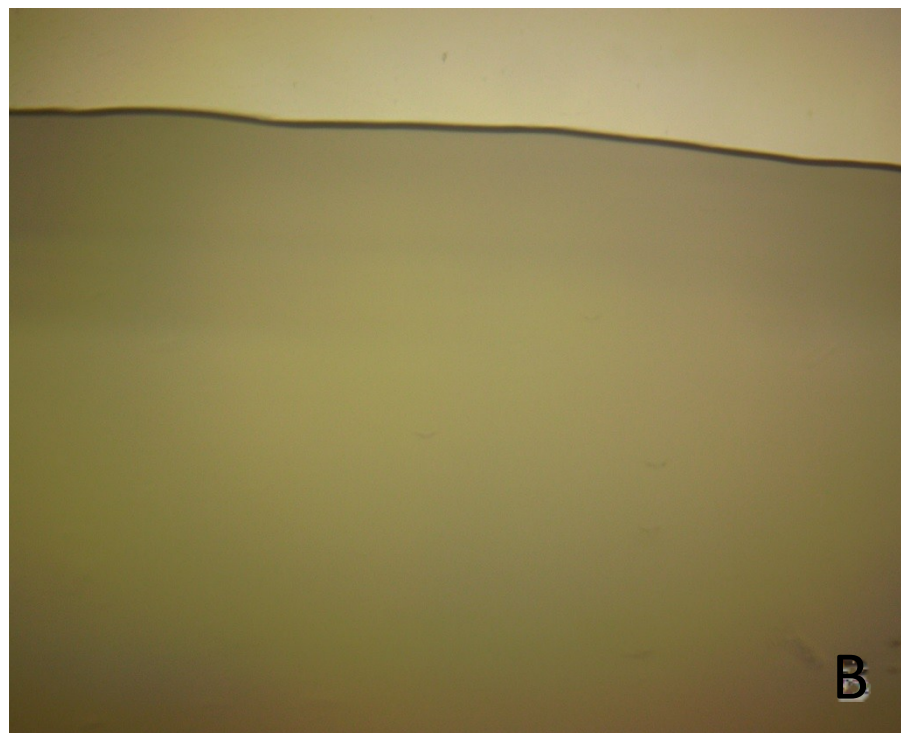

**Fig S12.** Optical microscopy of microcrystalline cellulose dissolved in **DBUHLev** (100 °C, 15 wt%), 4x(**A**) and 15x (**B**)

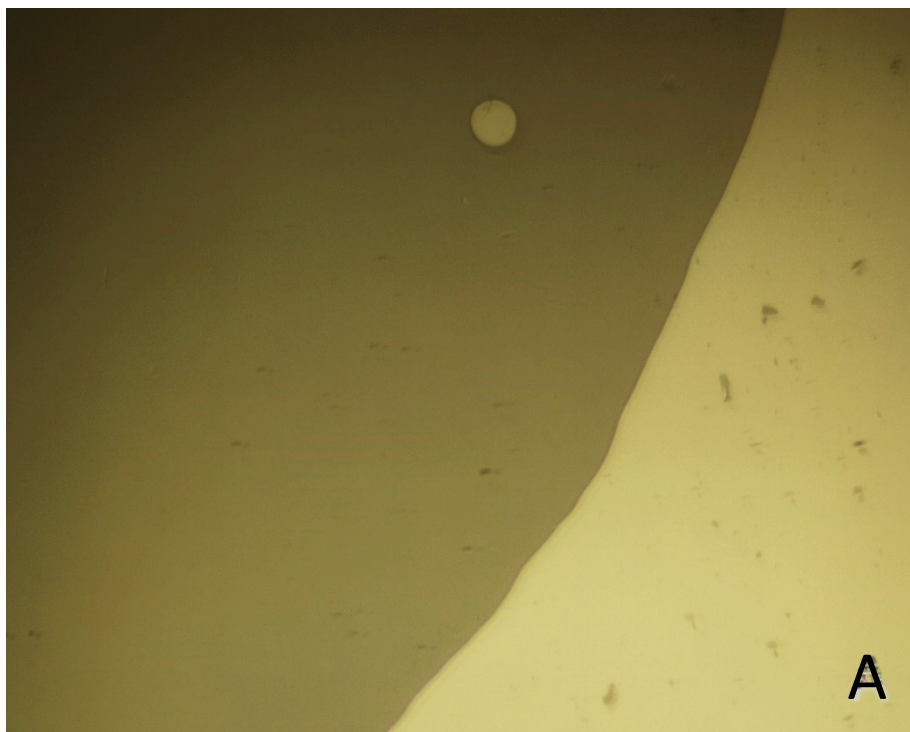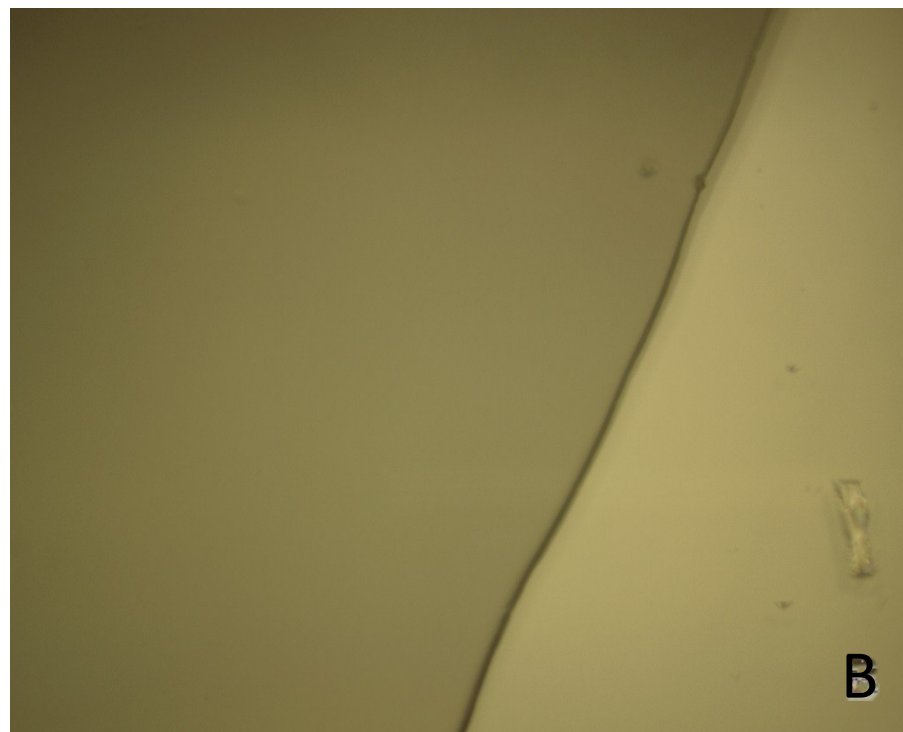

Fig S13. IR of MCC

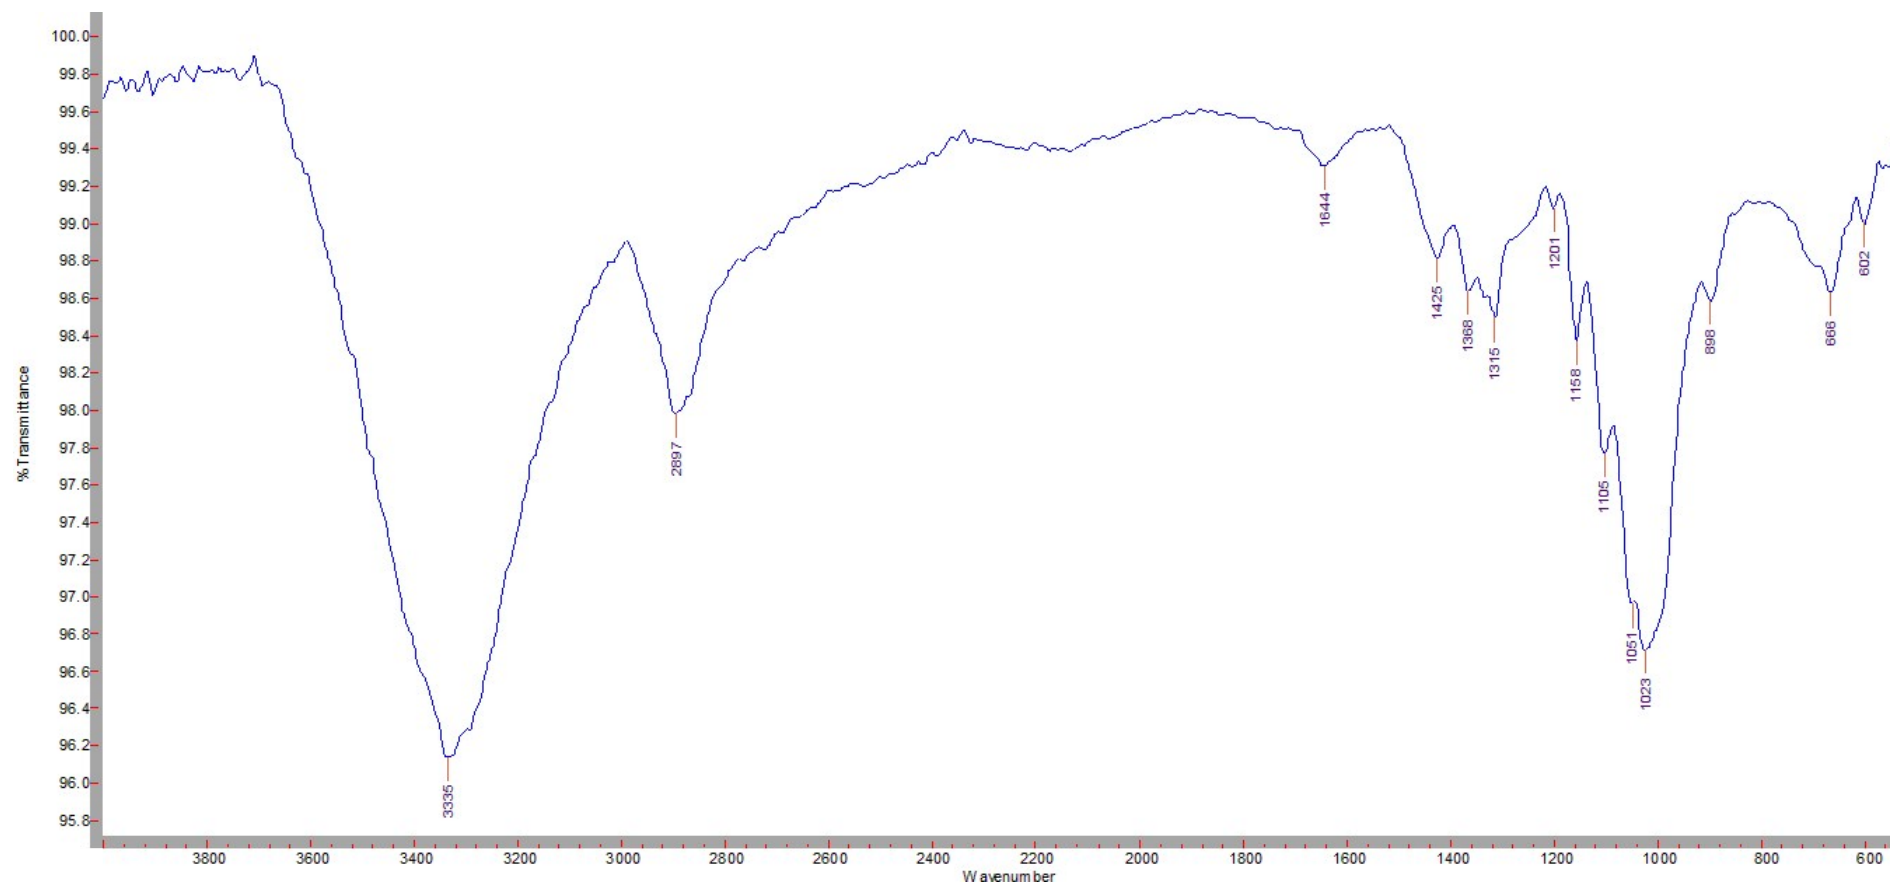

**Fig S14.** IR of regenerated cellulose after dissolution in **DBUHLev** at 100 °C

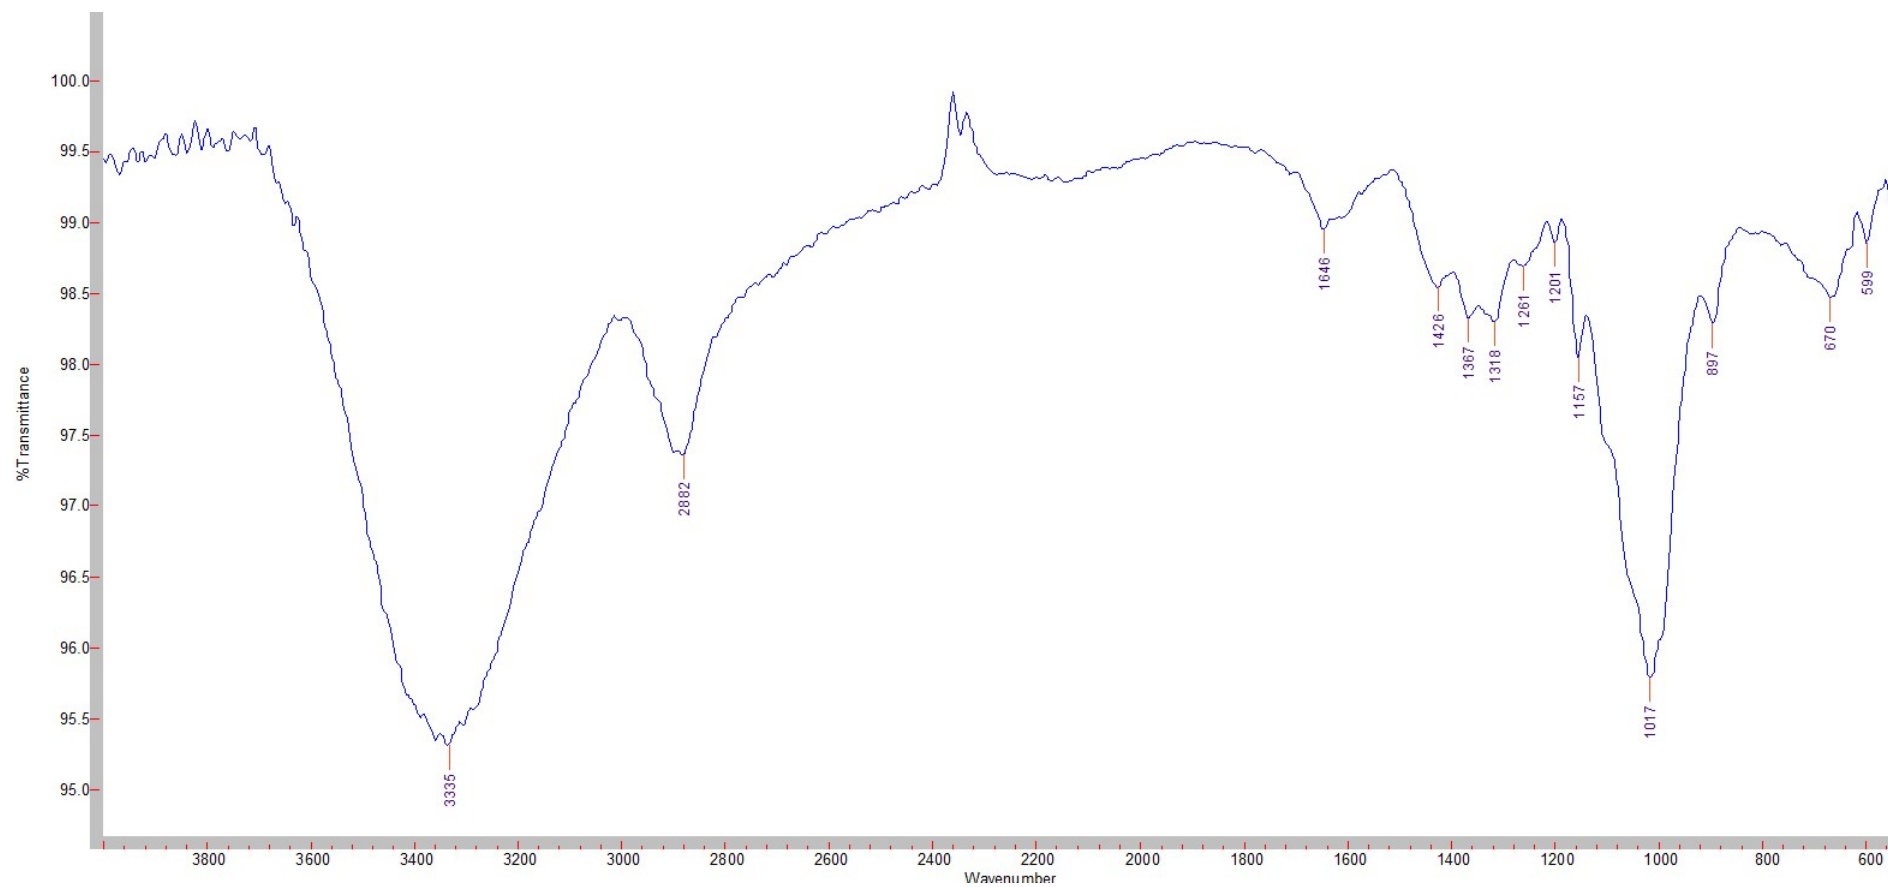

**Fig S15.** IR of regenerated cellulose after dissolution in **DBNHLev** at 100 °C

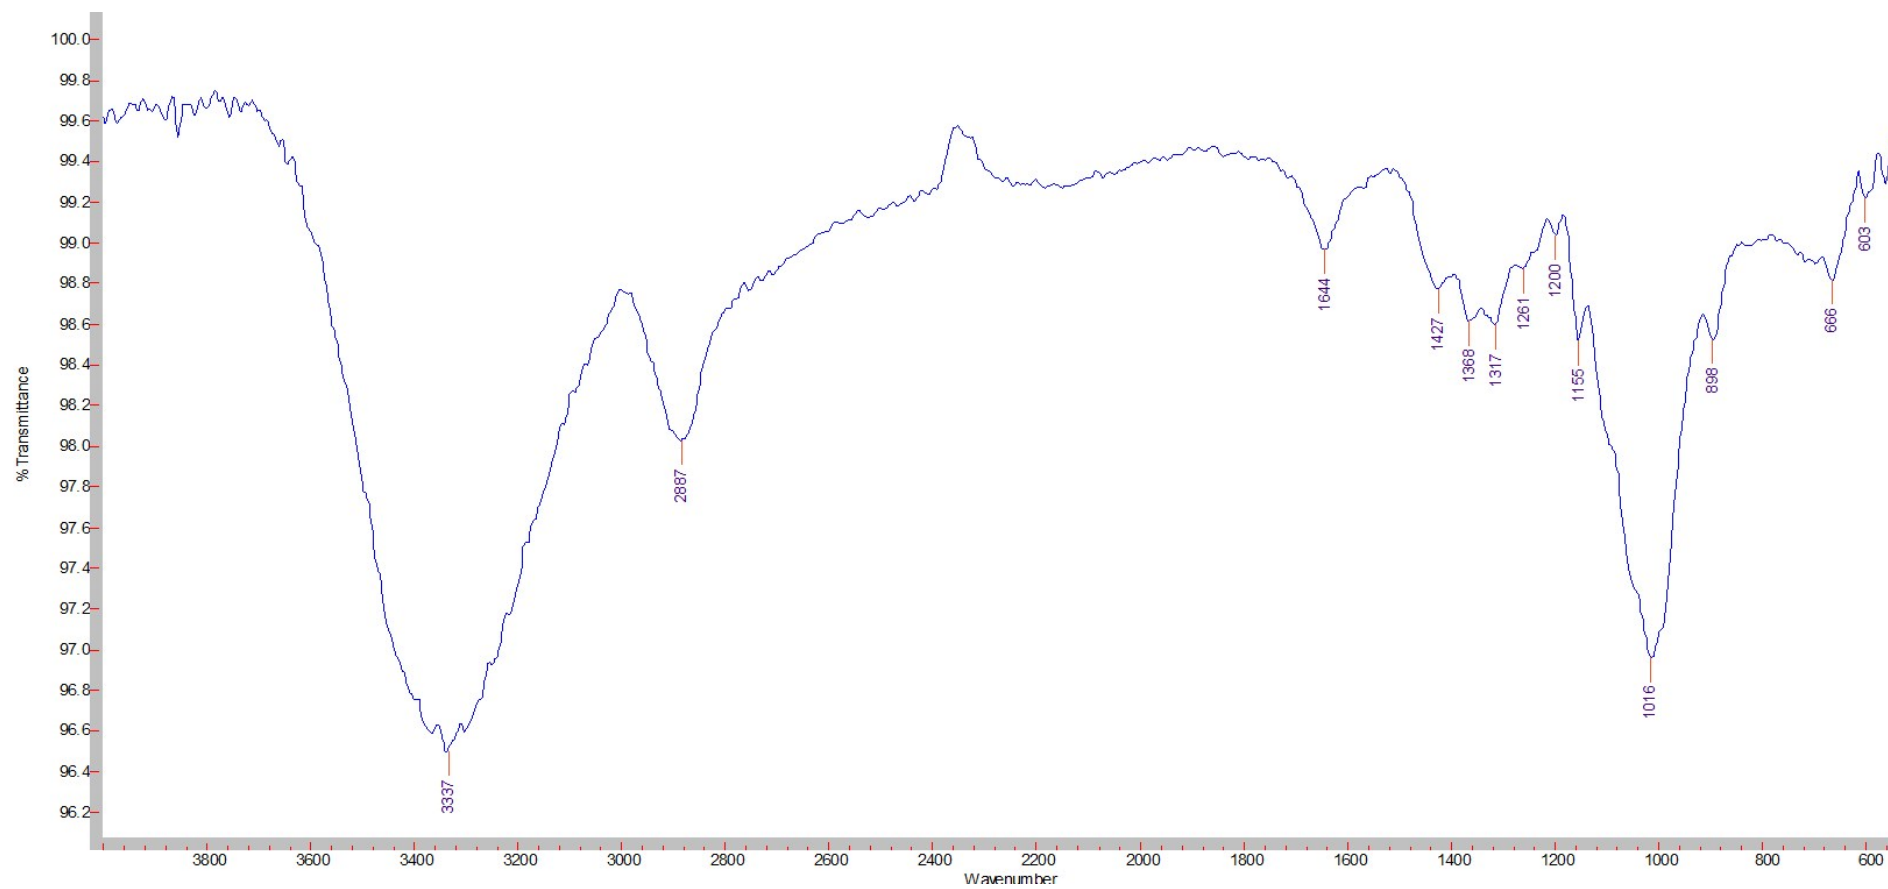

**Fig S16.**  $^1\text{H-NMR}$  of Levulinic Anhydride

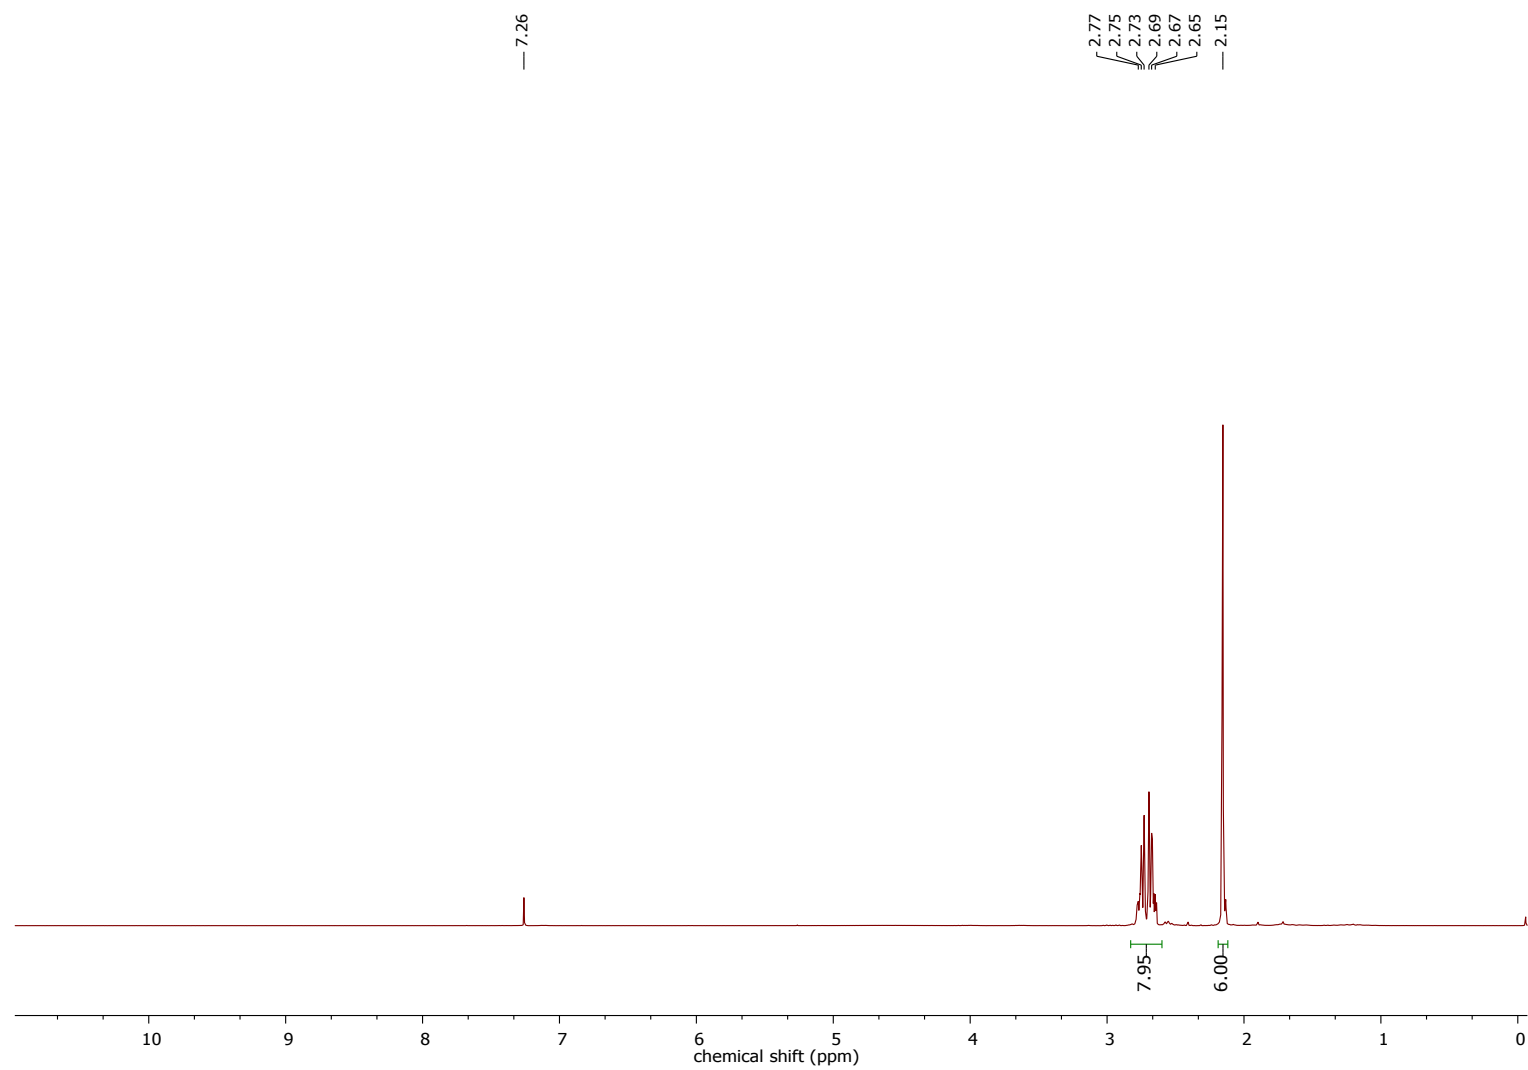



Fig S17.  $^{13}\text{C}$ -NMR of Levulinic Anhydride at 25 °C

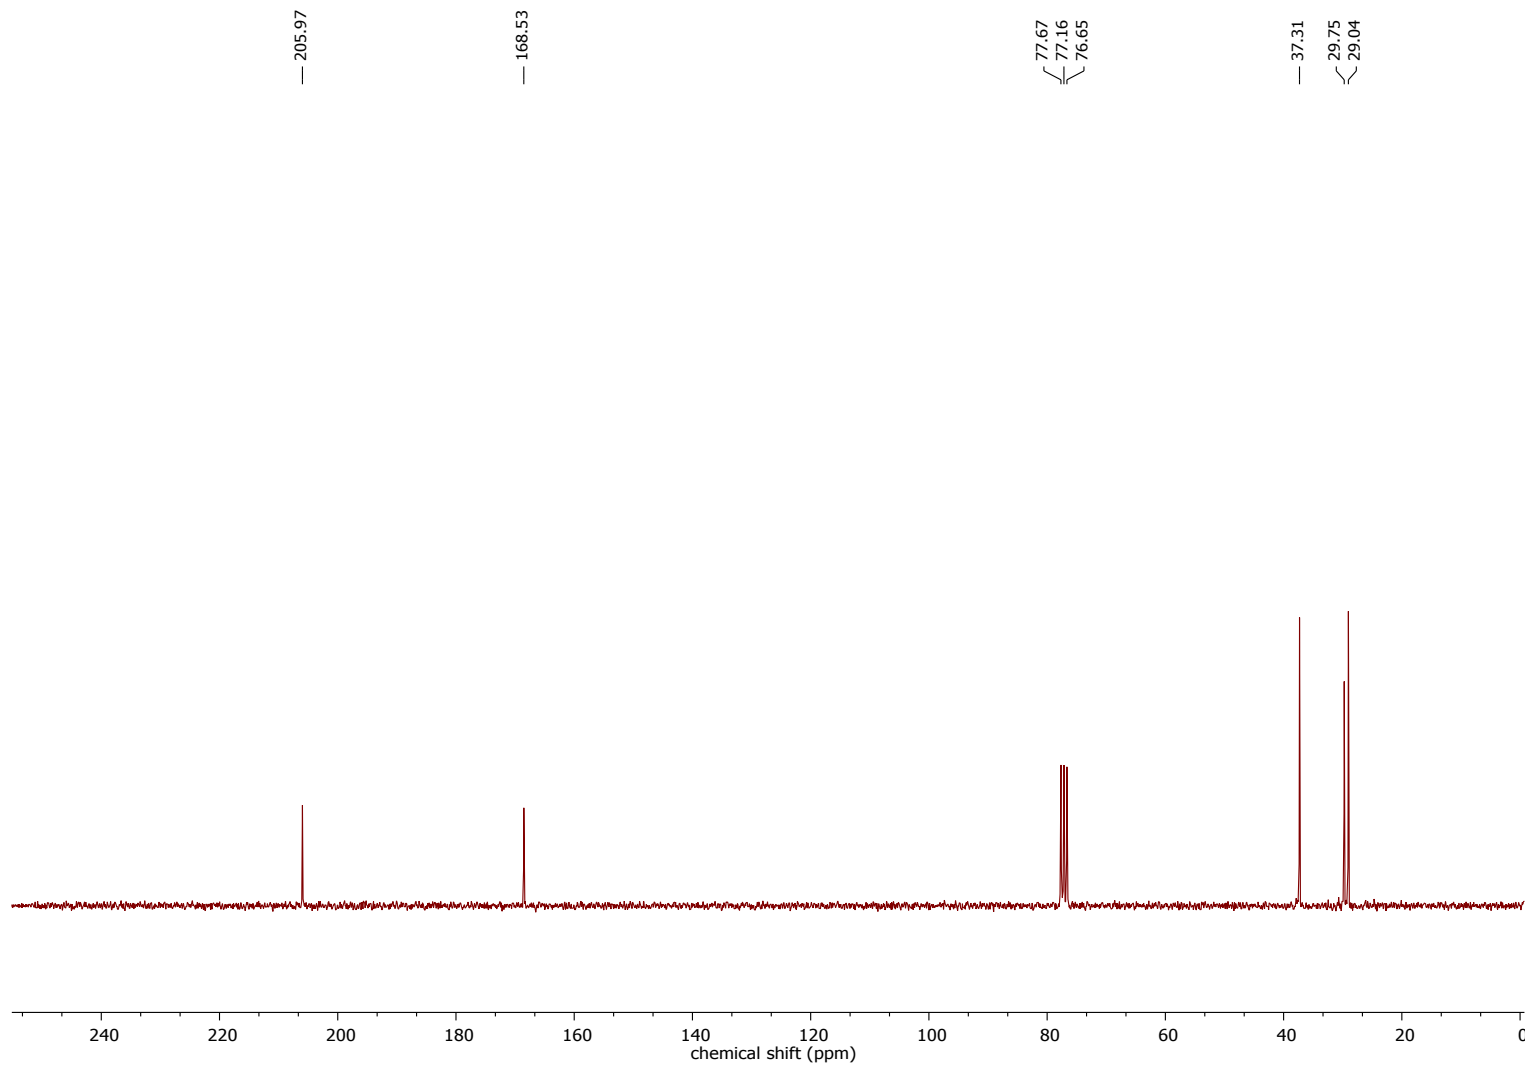

**Fig S18.** IR of cellulose levulinate from **DBNHLev**, 20 eq Lev<sub>2</sub>O, 80°C, 0.5 ml DMSO

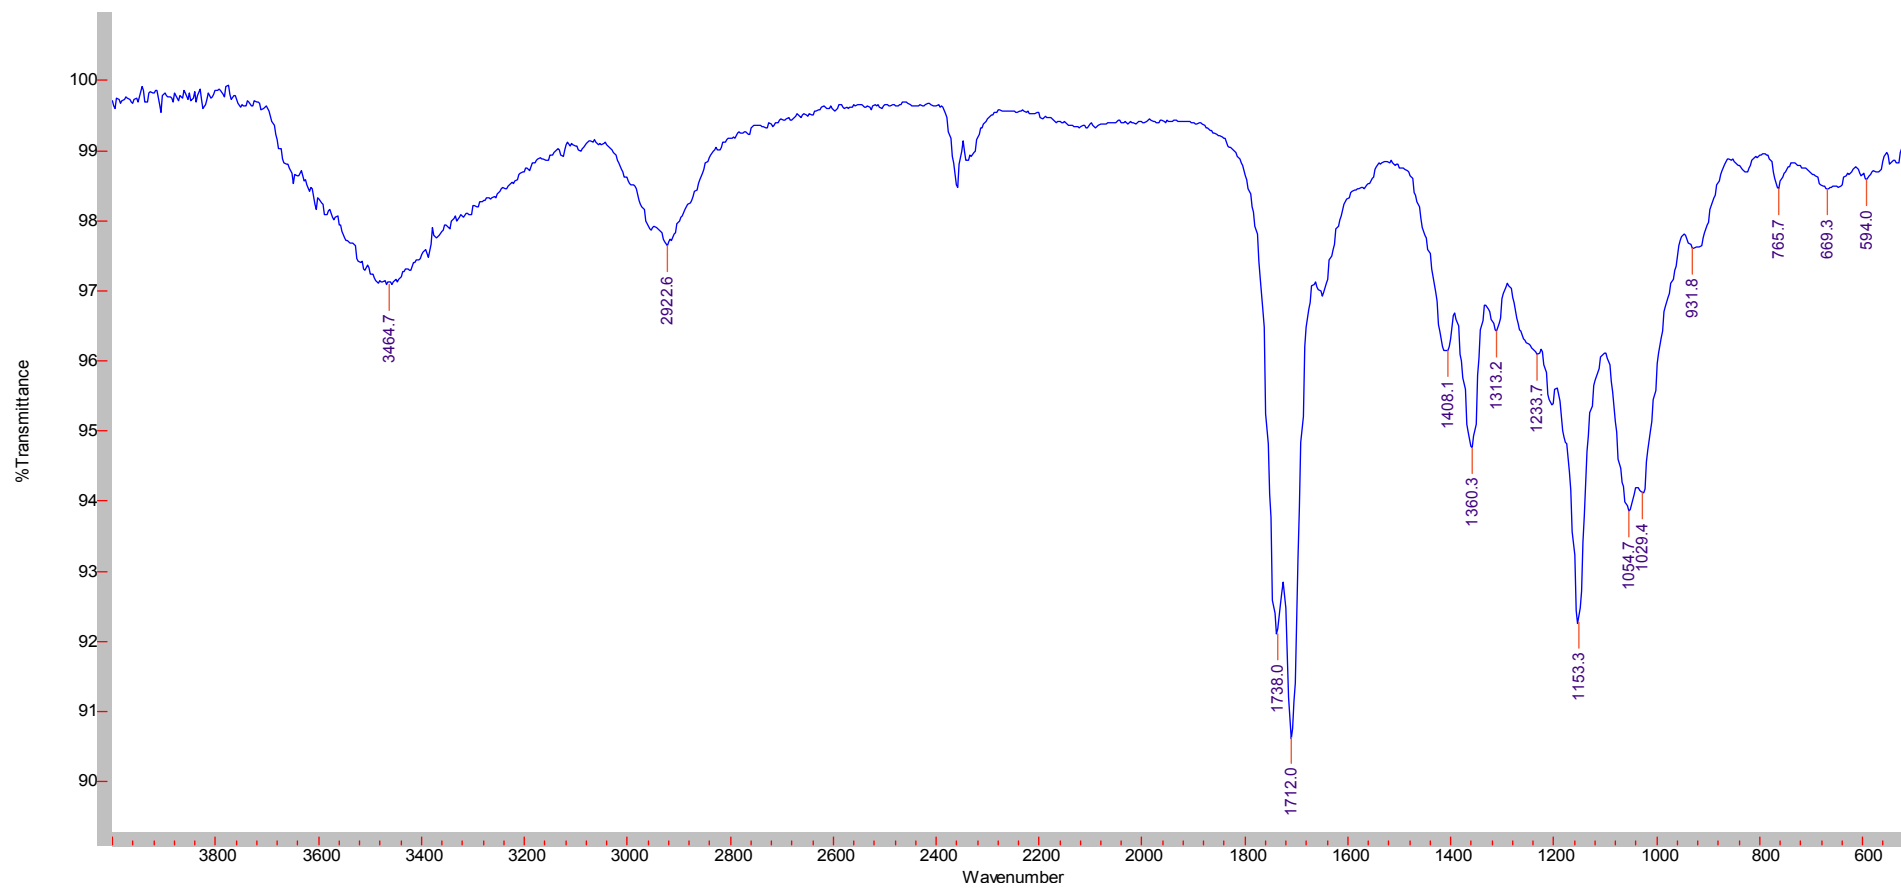

**Fig S19.** IR of cellulose levulinate from **DBNHLev**, 10 eq Lev<sub>2</sub>O, 80°C, 0.5 ml DMSO

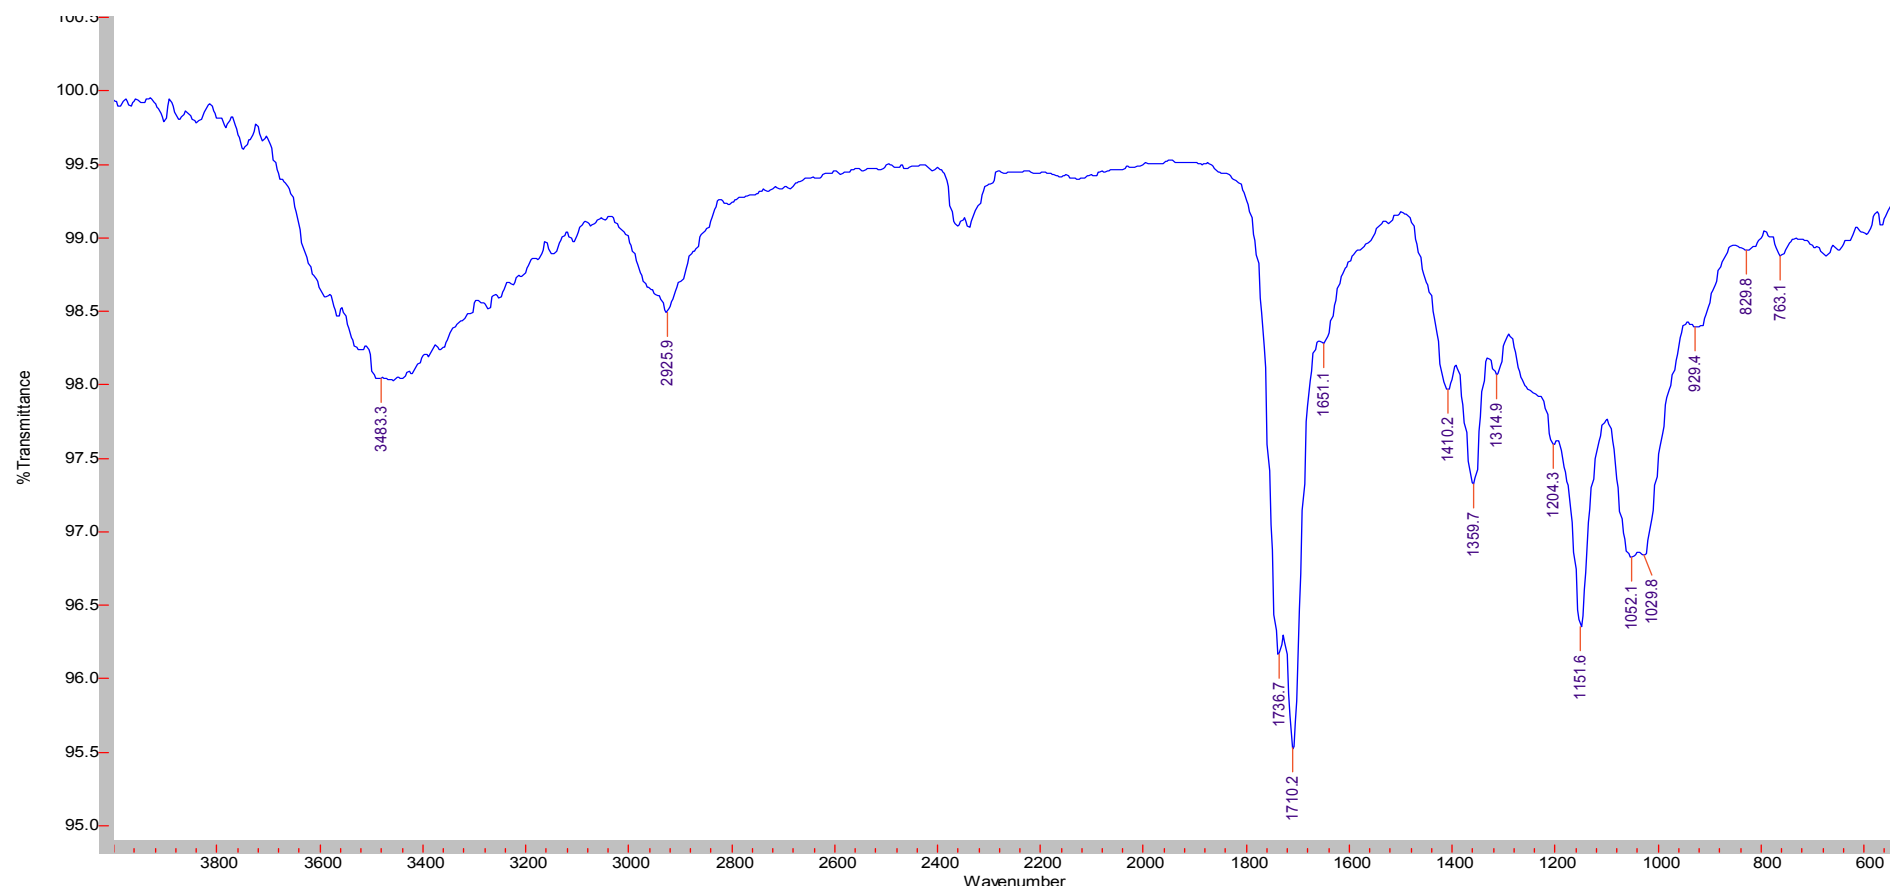

**Fig S20.** IR of cellulose levulinate from **DBNHLev**, 10 eq Lev<sub>2</sub>O, 50°C, 0.5 ml DMSO

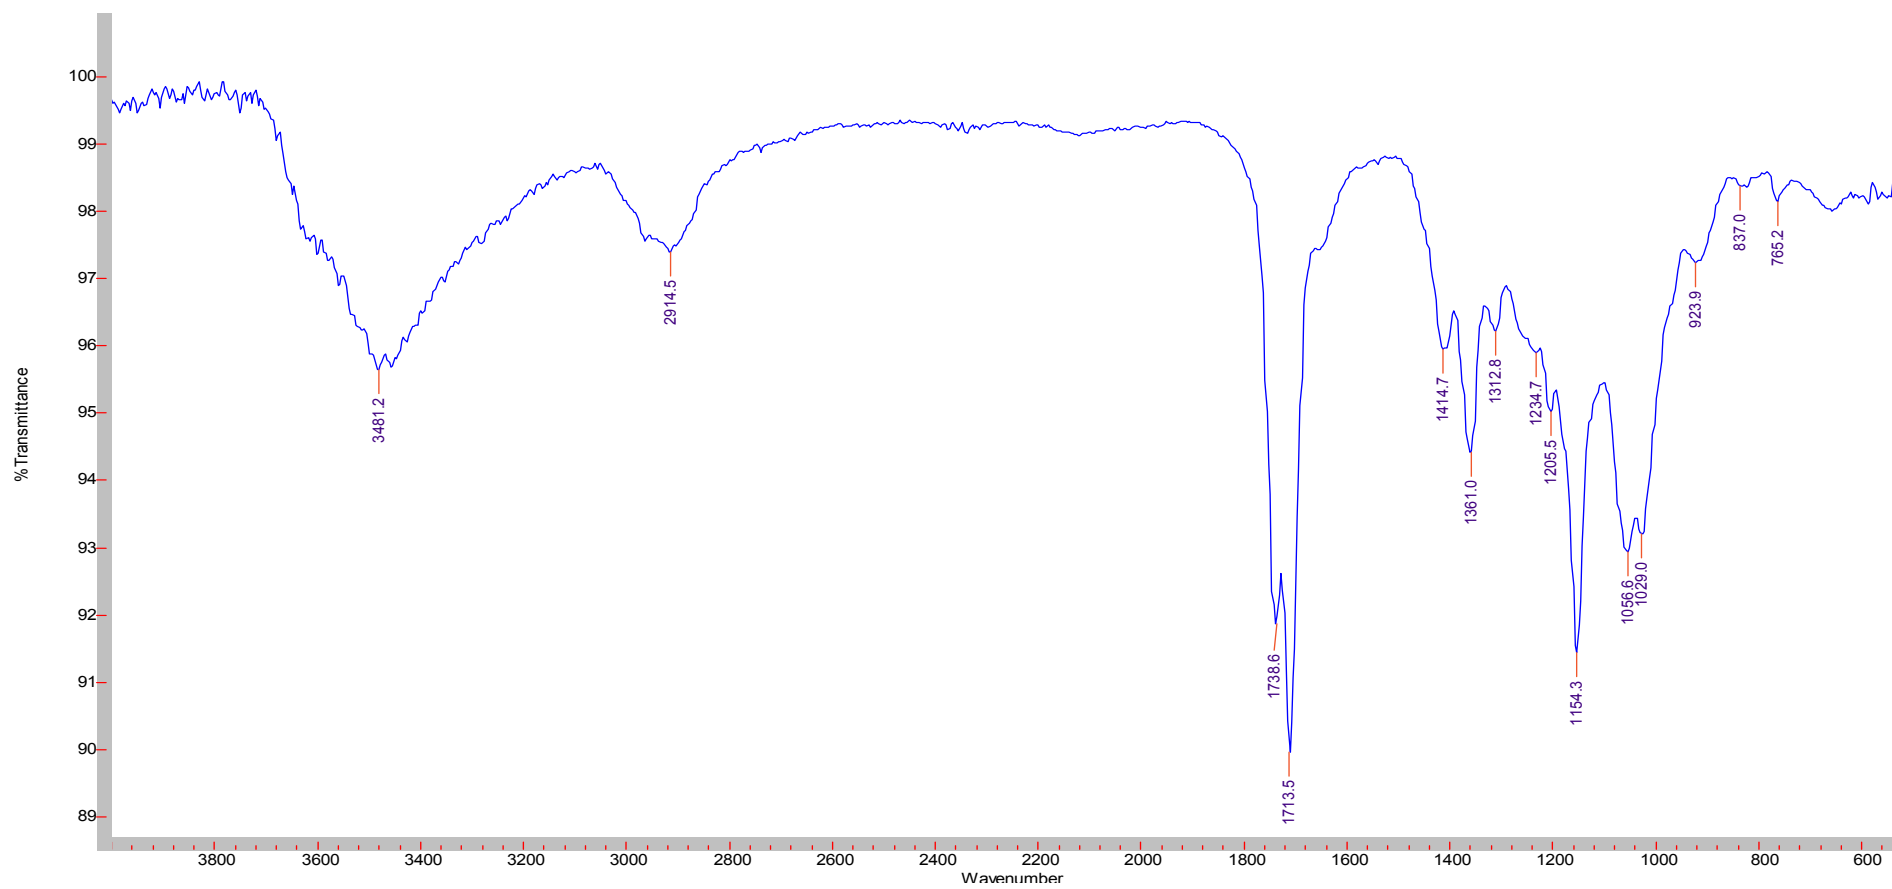

**Fig S21.** IR of cellulose levulinate from **DBNHLev**, 10 eq Lev<sub>2</sub>O, 25°C, 0.5 ml DMSO

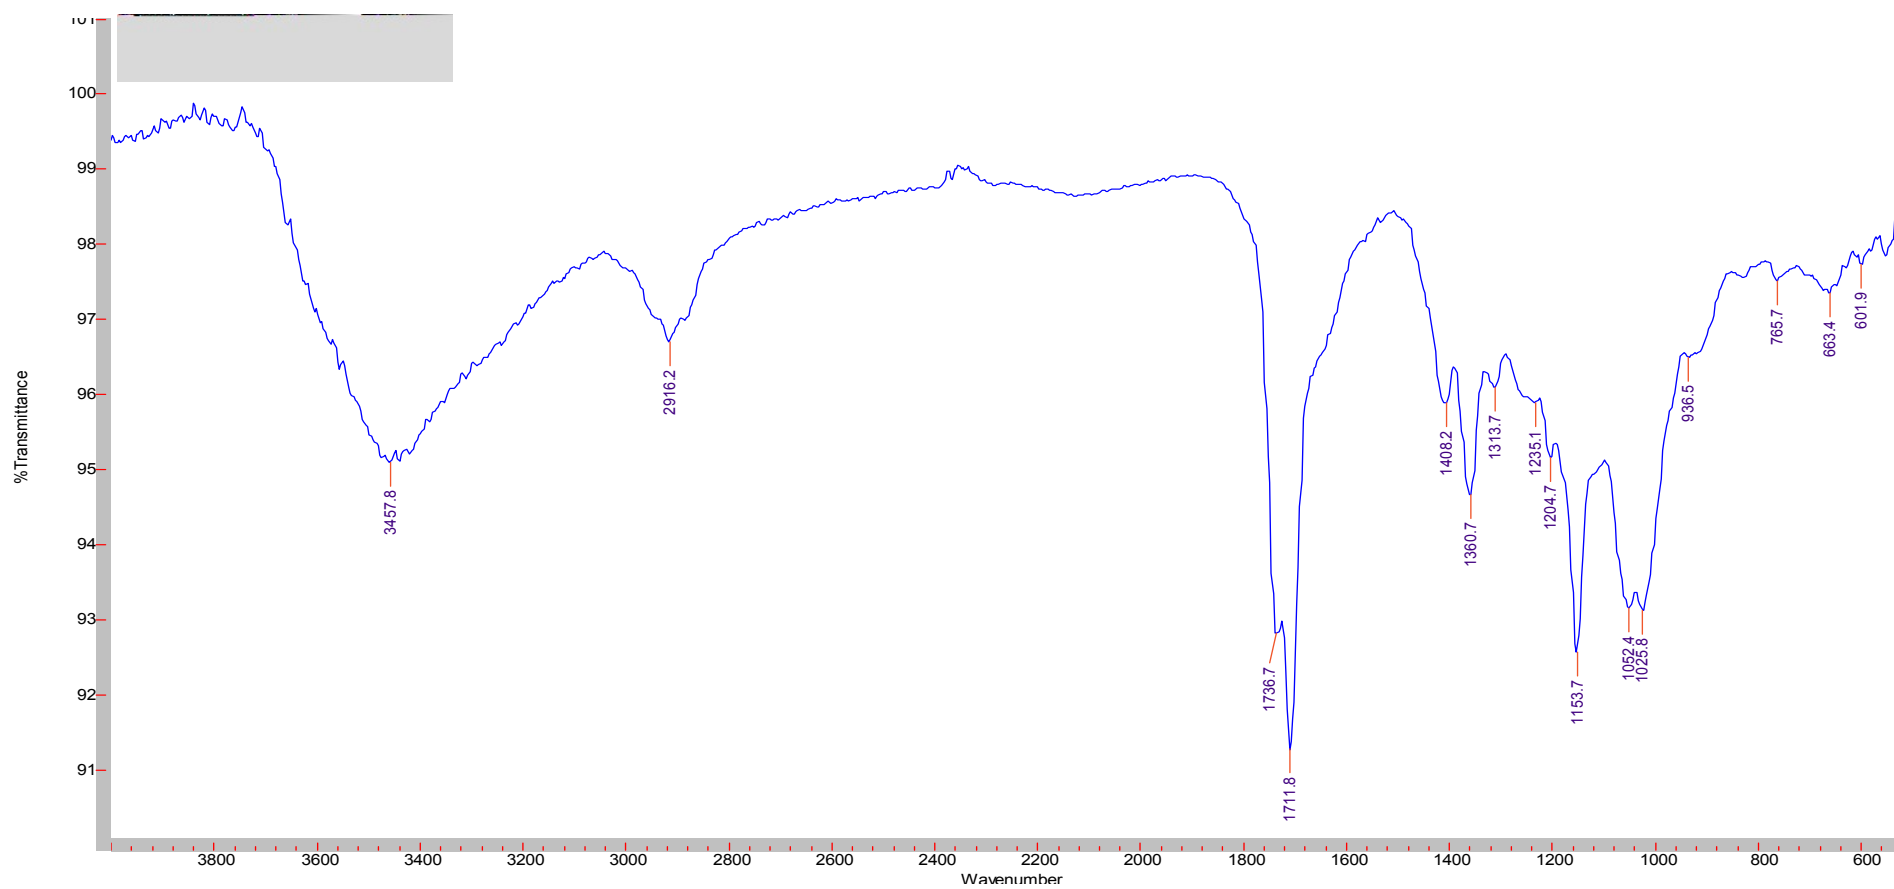

**Fig S22.** IR of cellulose levulinate from **DBNHLev**, 3 eq Lev<sub>2</sub>O, 80°C, 0.5 ml DMSO

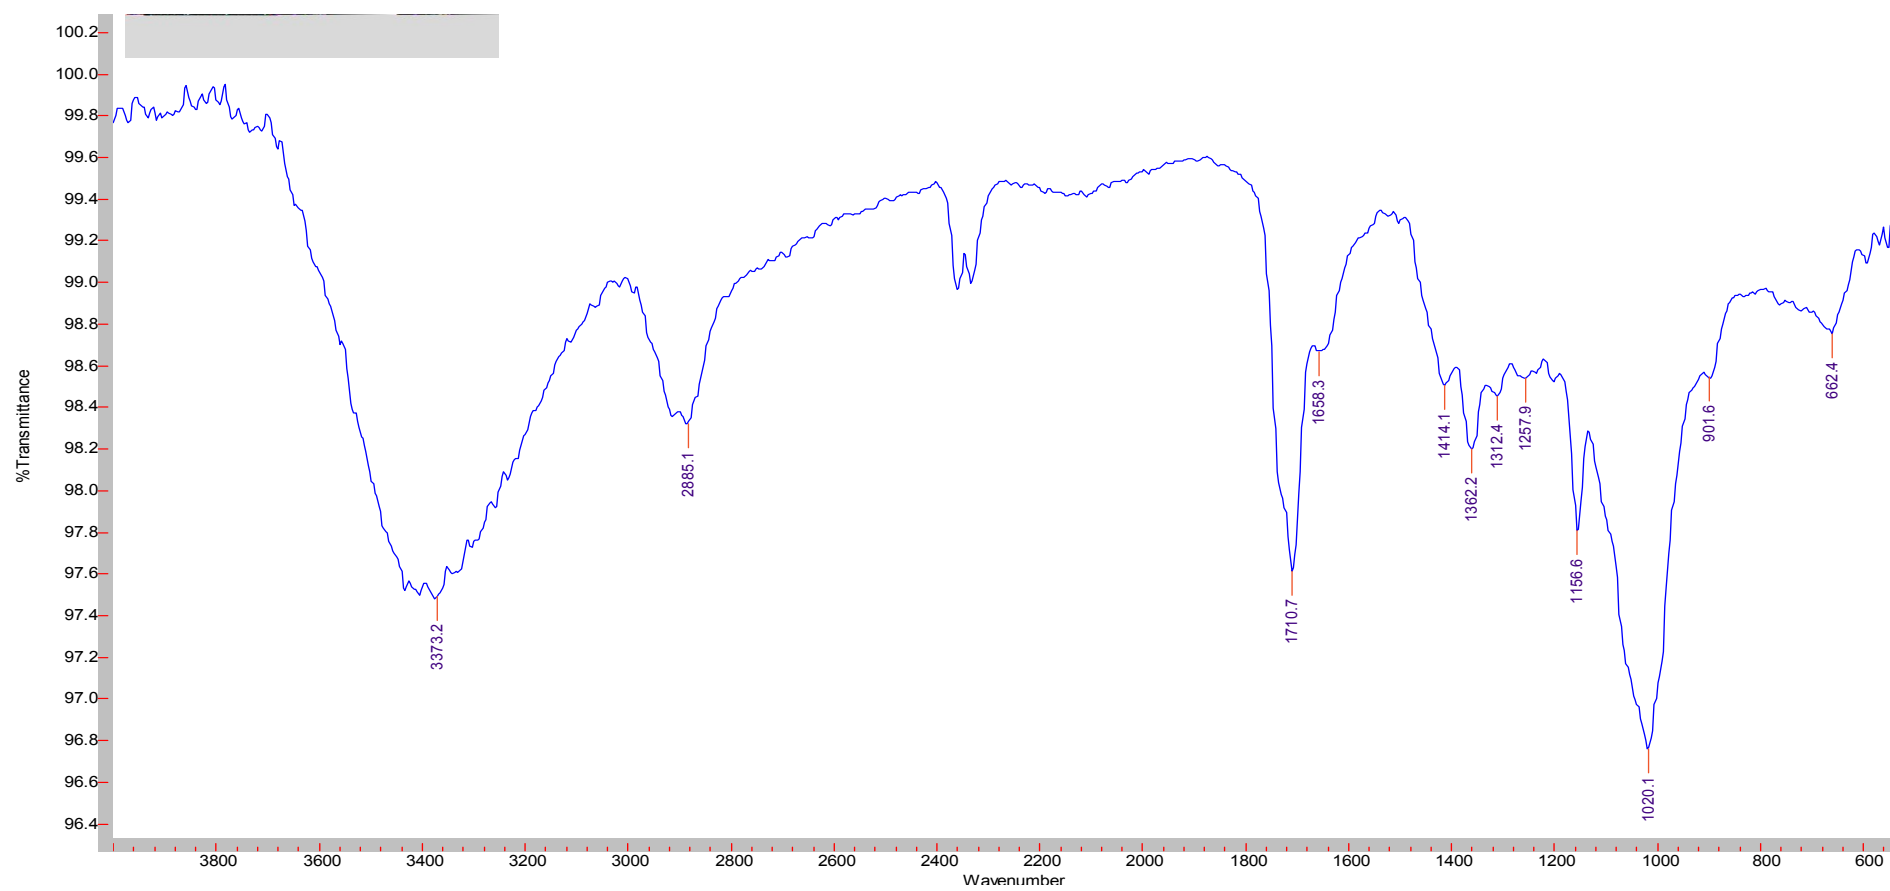

**Fig S23.** IR of cellulose levulinate from **DBNHLev**, 20 eq Lev<sub>2</sub>O, 80°C, 0.5 ml  $\gamma$ -valerolactone

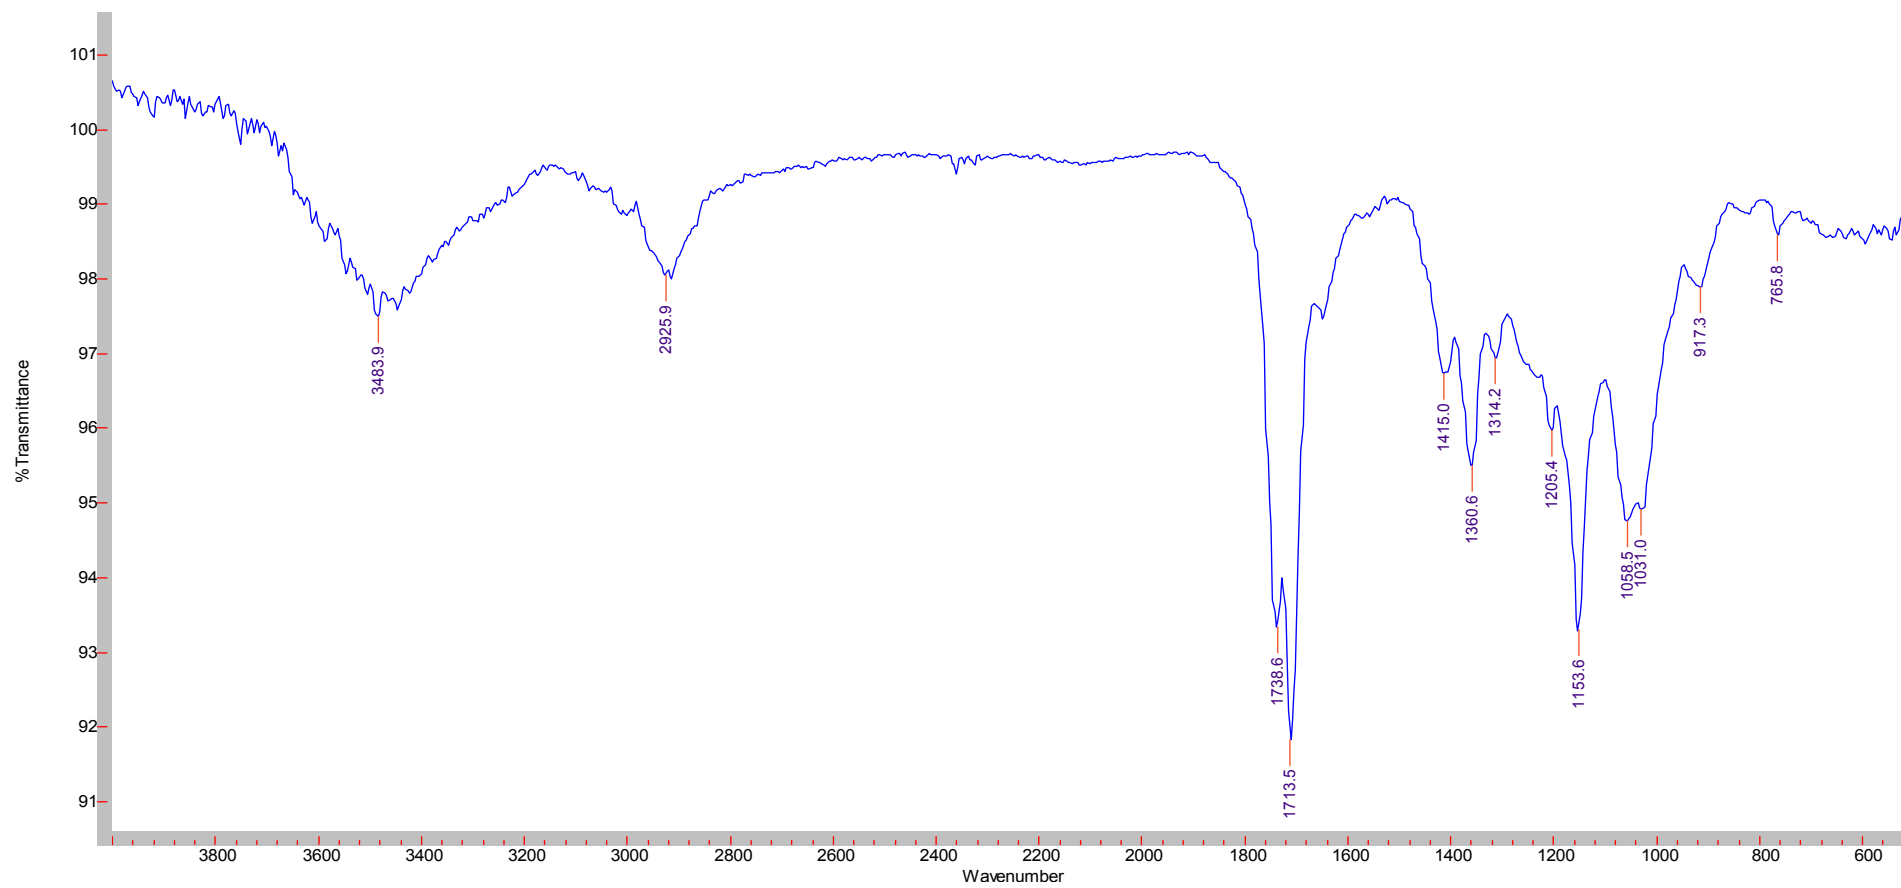

**Fig S24.** IR of cellulose levulinate from **DBNHLev**, 10 eq Lev<sub>2</sub>O, 80°C, 0.5 ml  $\gamma$ -valerolactone

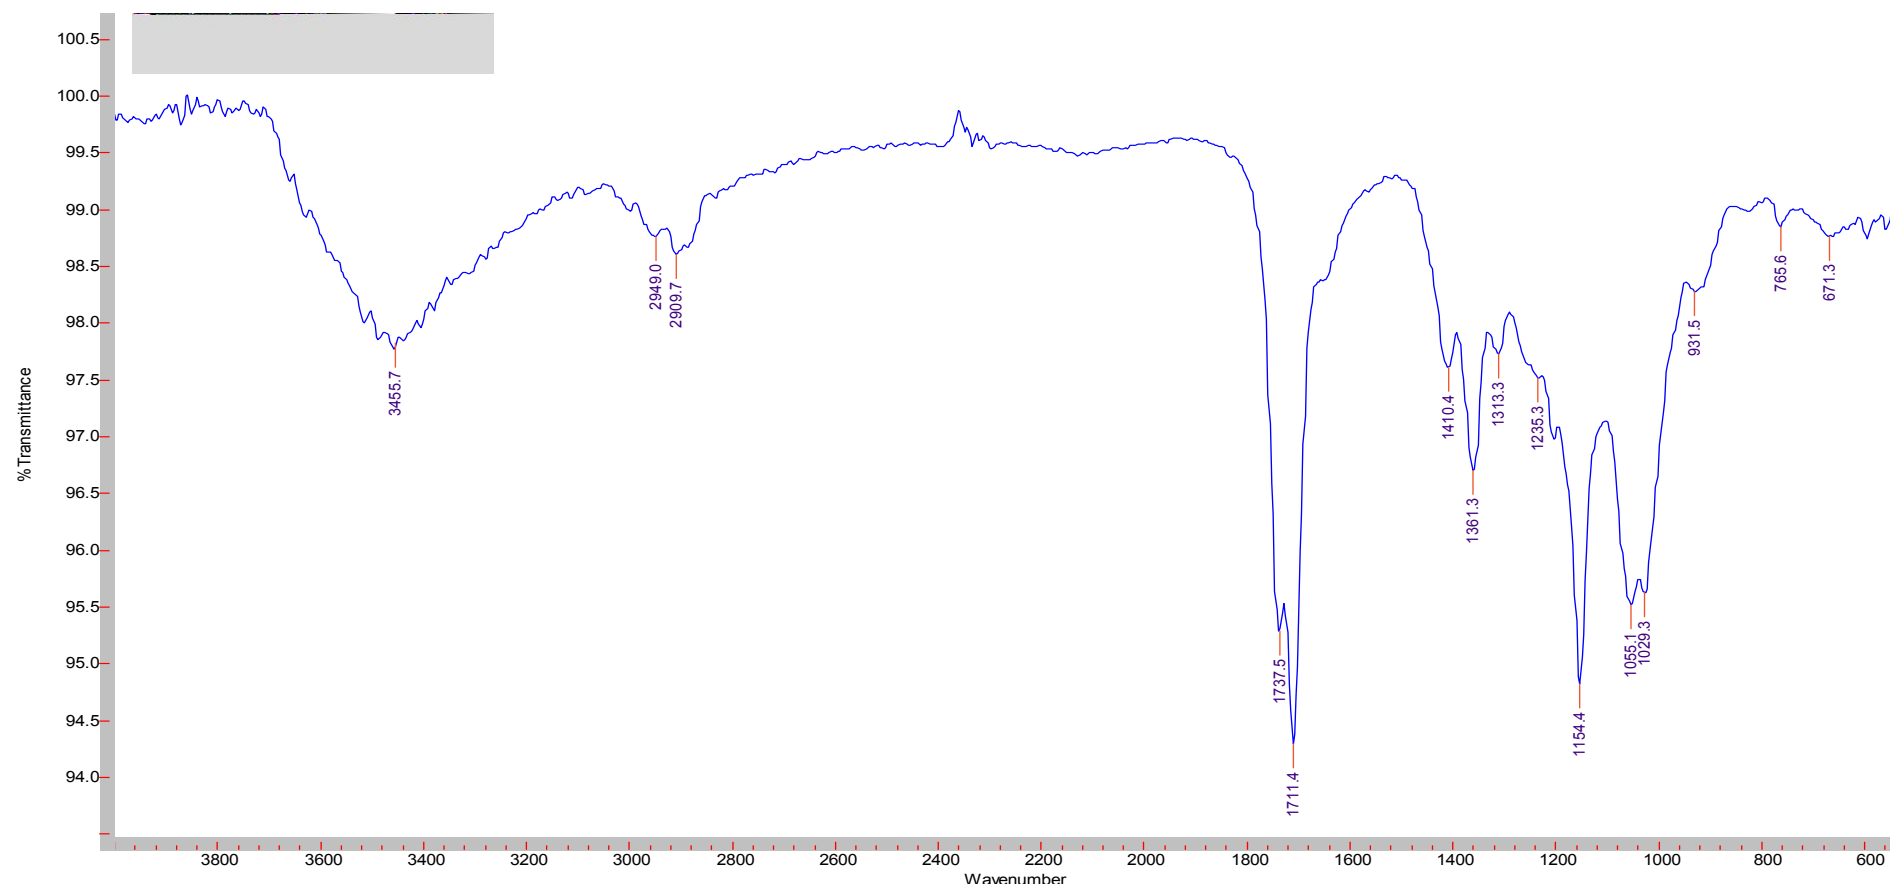



**Fig S25.** IR of cellulose levulinate from **DBNHLev**, 10 eq Lev<sub>2</sub>O, 50°C, 0.5 ml  $\gamma$ -valerolactone

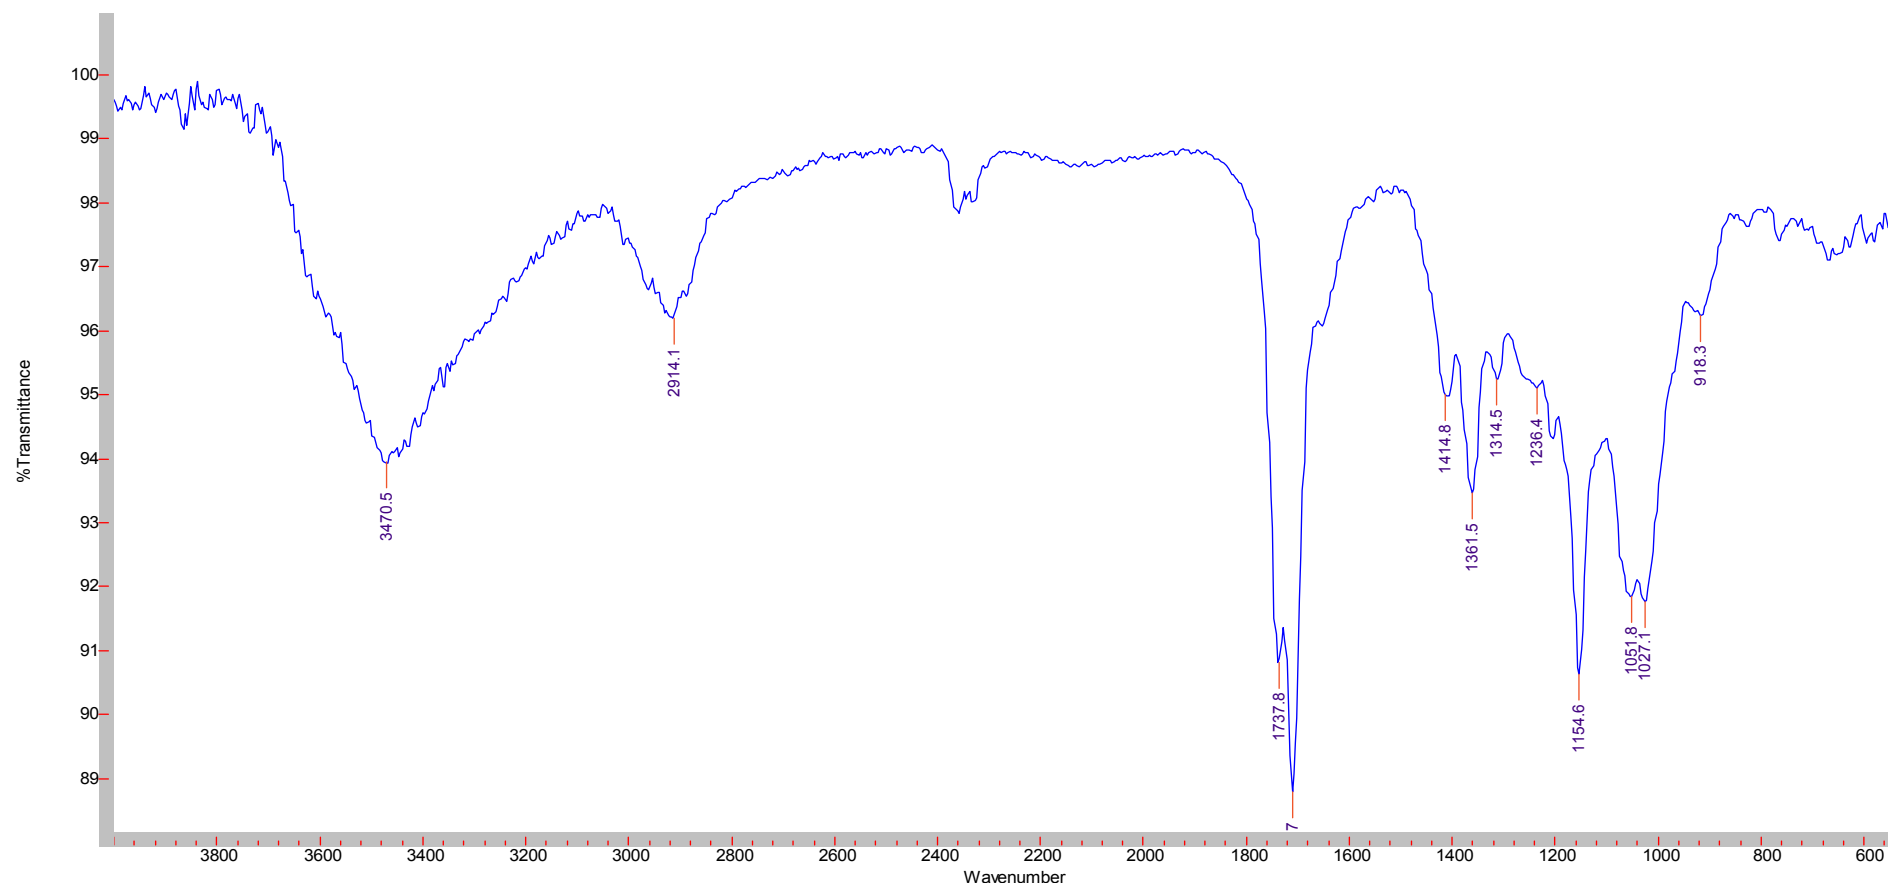

**Fig S26.** IR of cellulose levulinate from **DBNHLev**, 10 eq Lev<sub>2</sub>O, 25°C, 0.5 ml  $\gamma$ - valerolactone

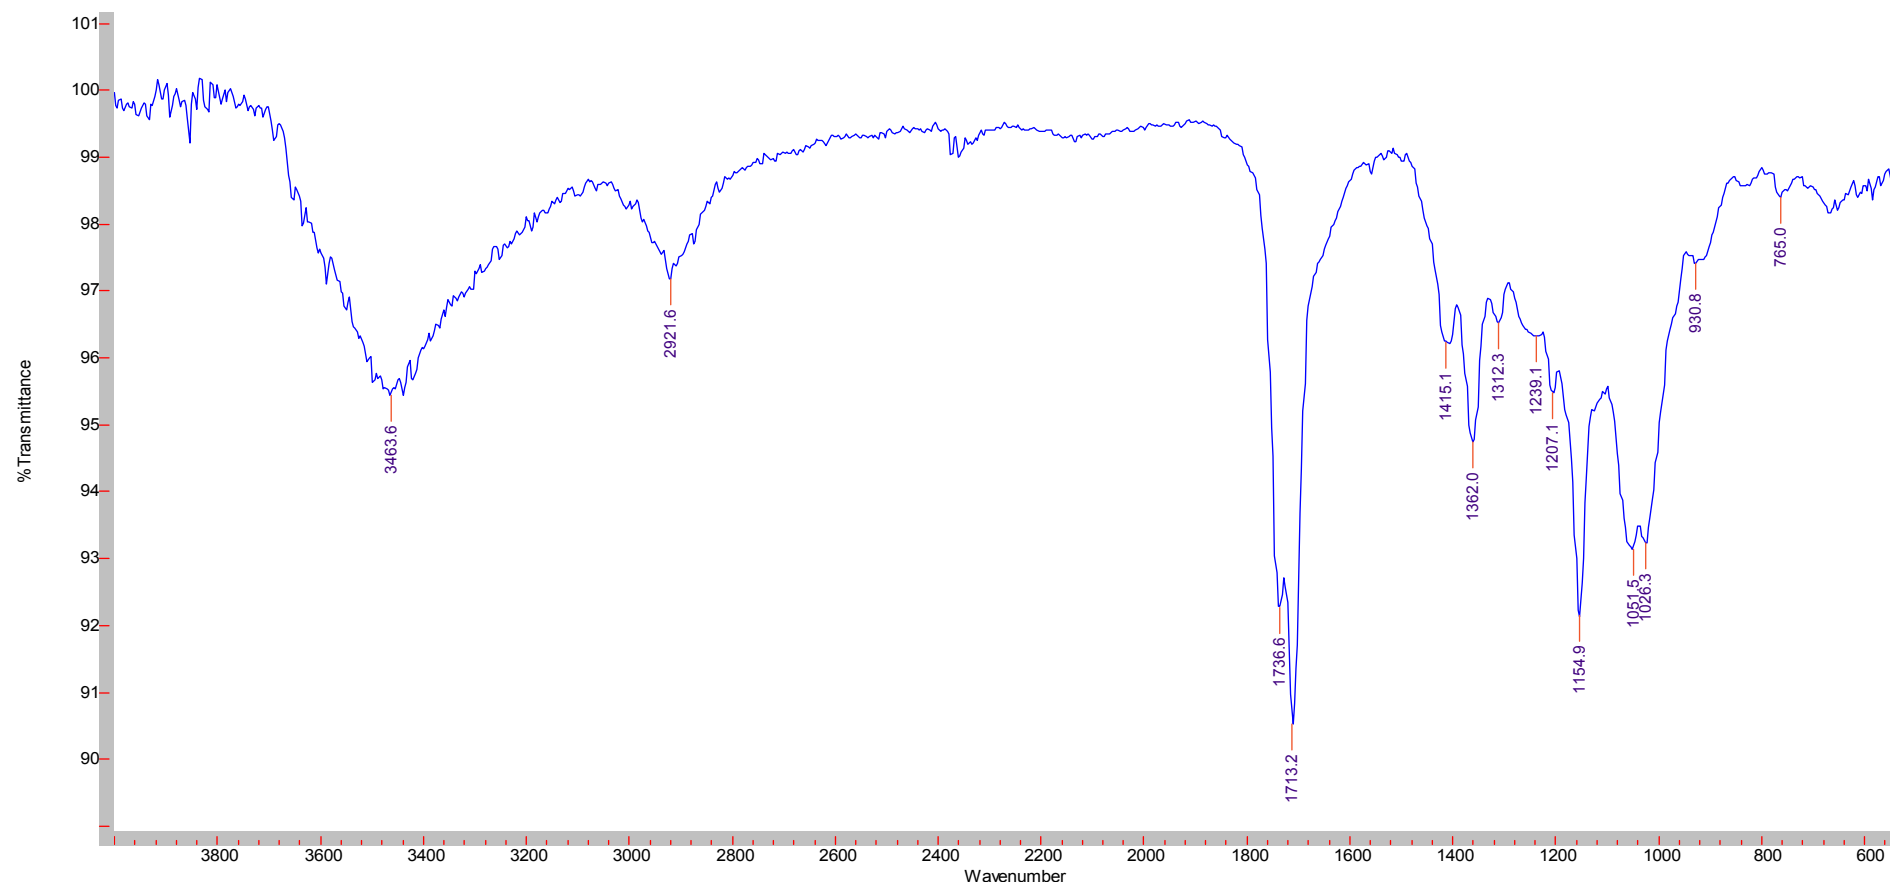

**Fig S27.** IR of cellulose levulinate from **DBNHLev**, 10eq Lev<sub>2</sub>O, 80°C, 3.5gr DMSO

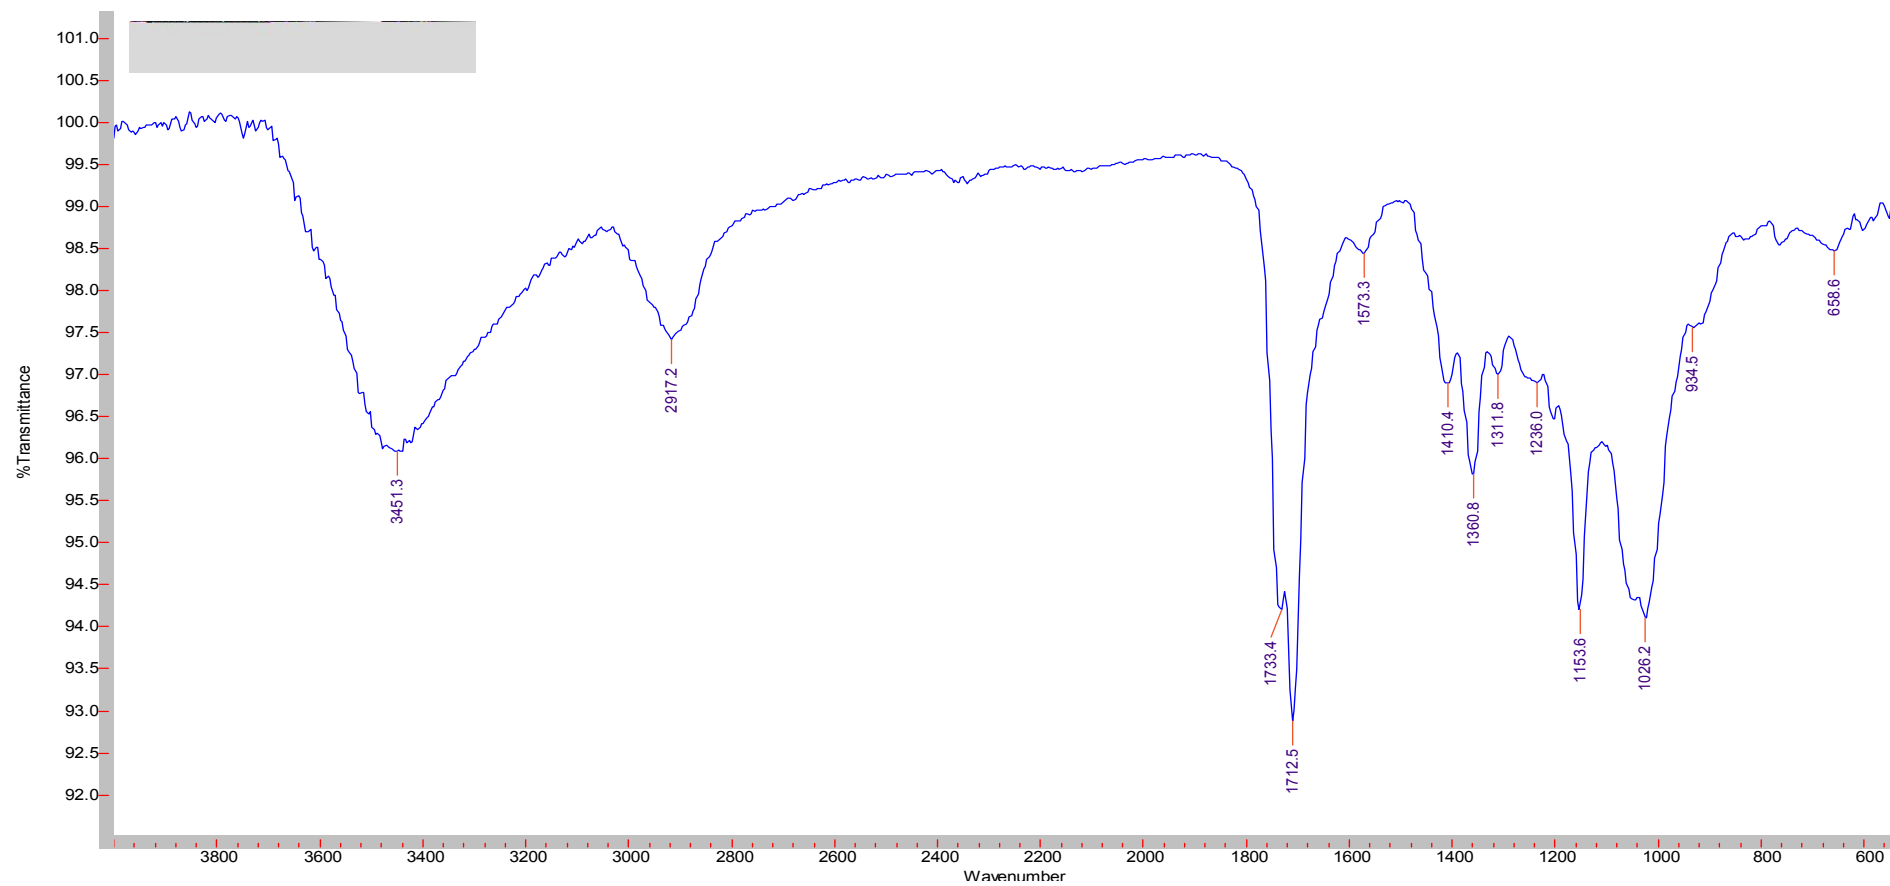

**Fig S28.** IR of cellulose levulinate from **DBUHLev**, 10 eq Lev<sub>2</sub>O, 80°C, 0.5 ml DMSO

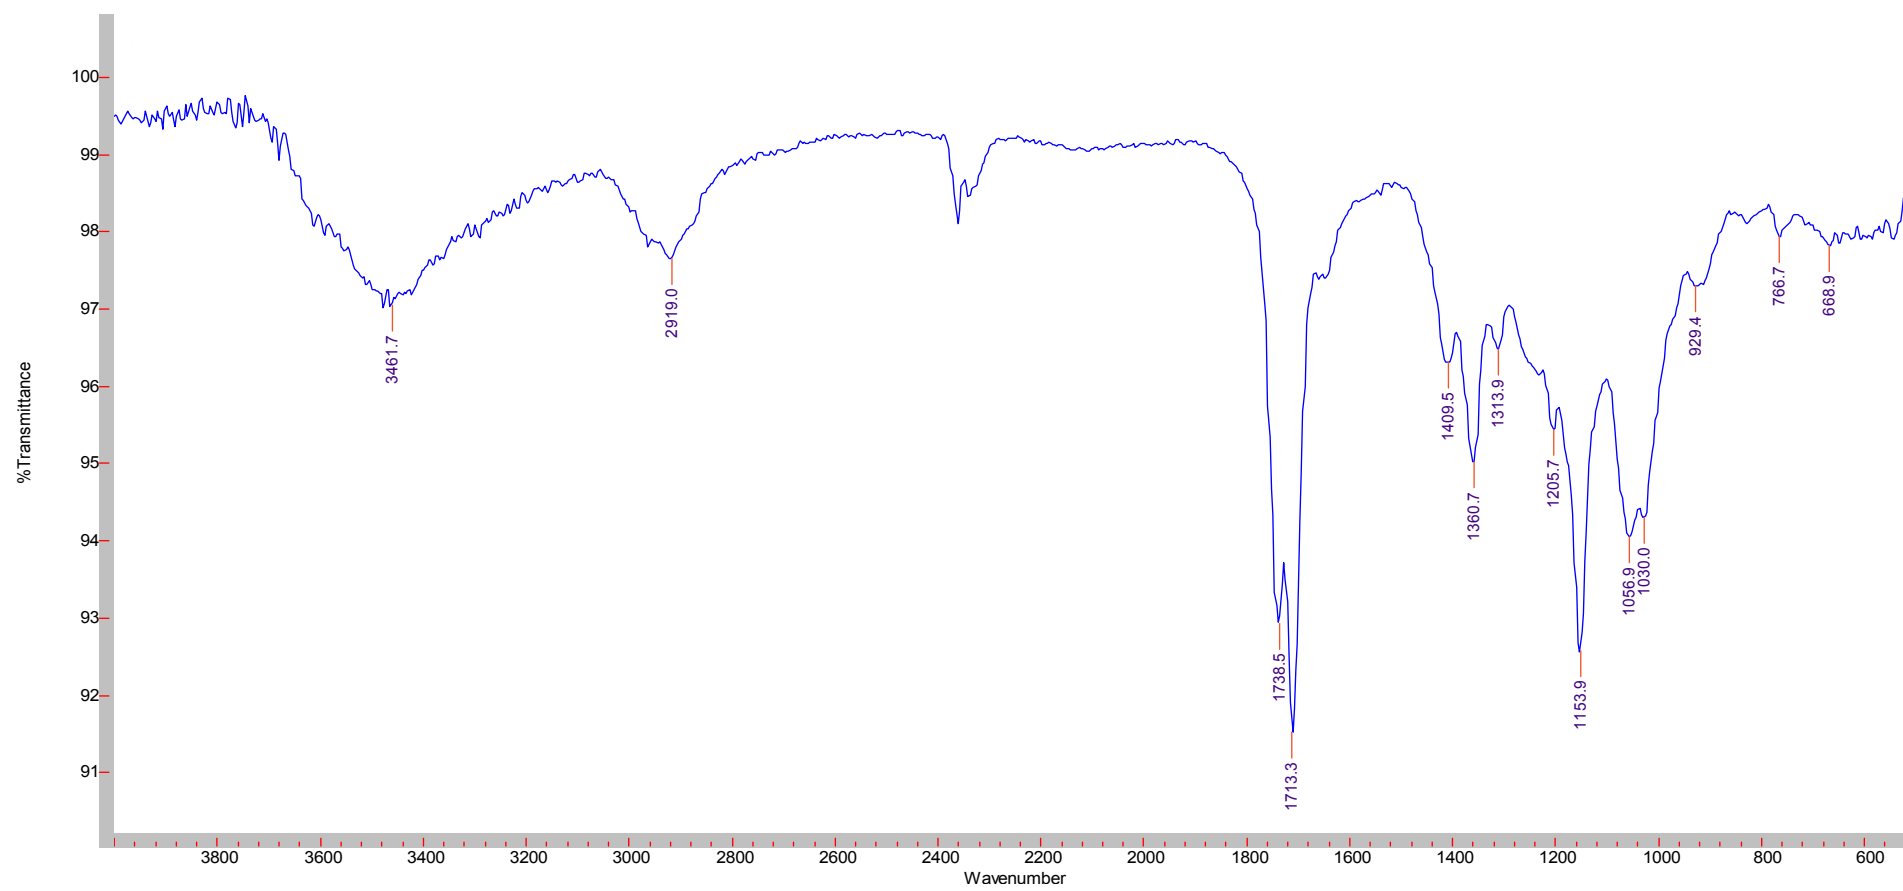

**Fig S29.** IR of cellulose levulinate from **DBUHLev**, 10 eq Lev<sub>2</sub>O, 80°C, 0.5 ml DMSO

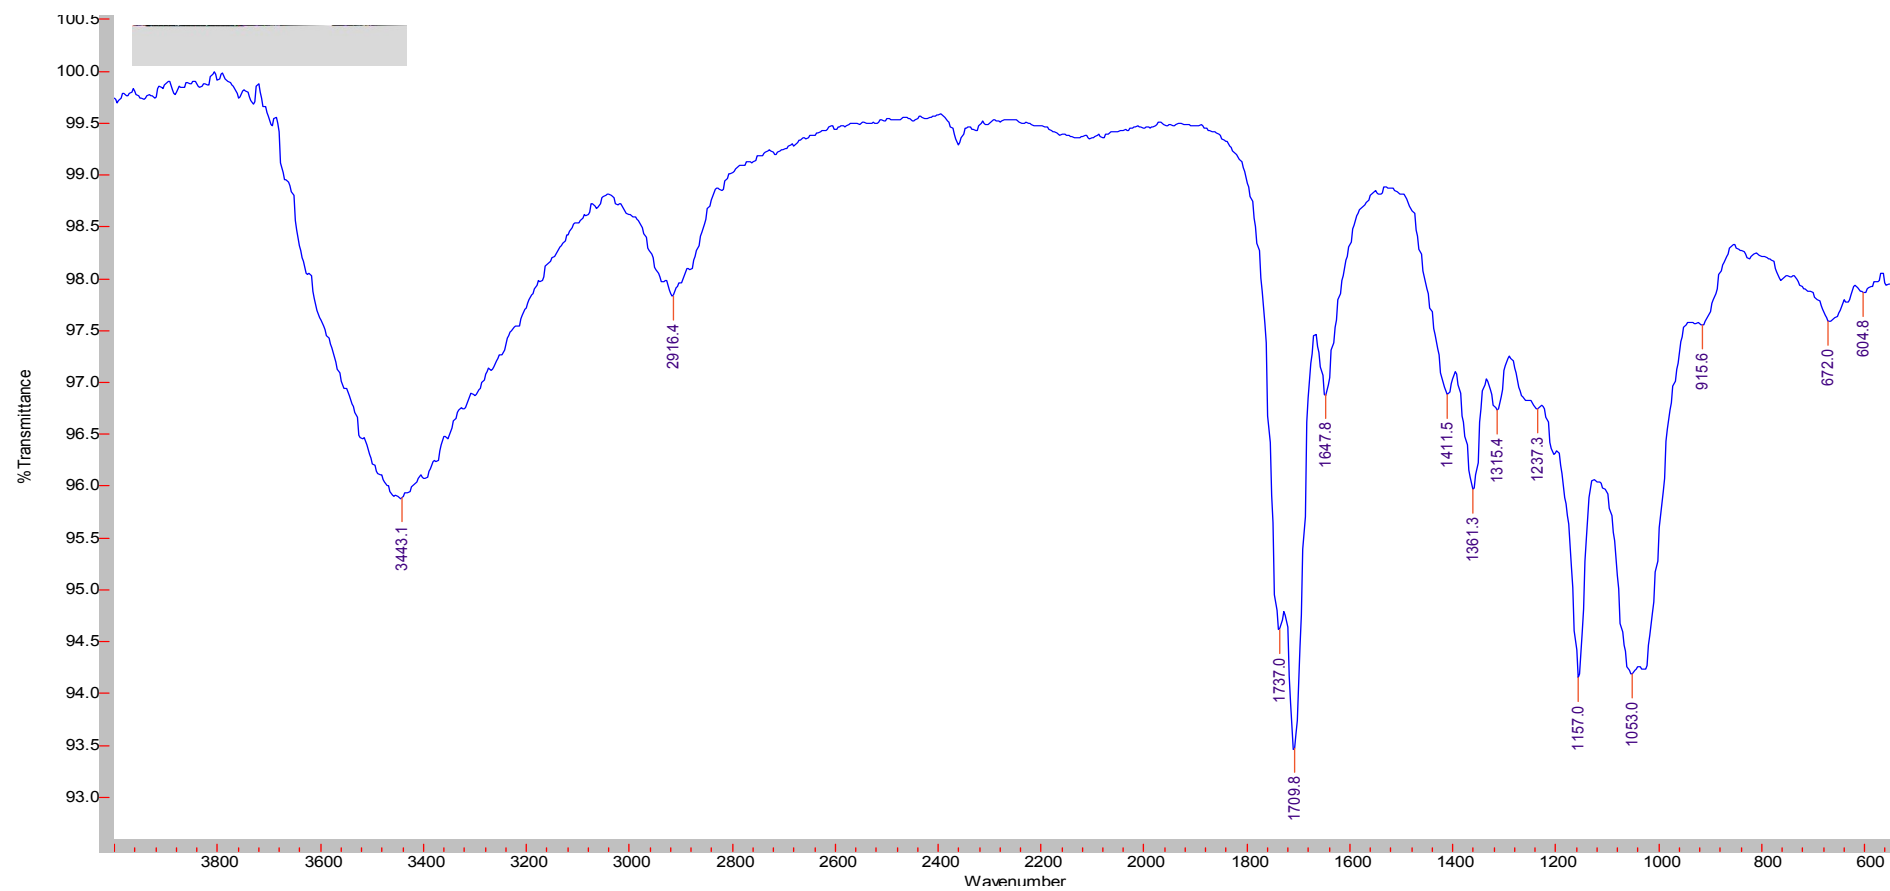

**Fig S30.** IR of cellulose levulinate from **DBUHLev**, 10 eq Lev<sub>2</sub>O, 50°C, 0.5 ml DMSO

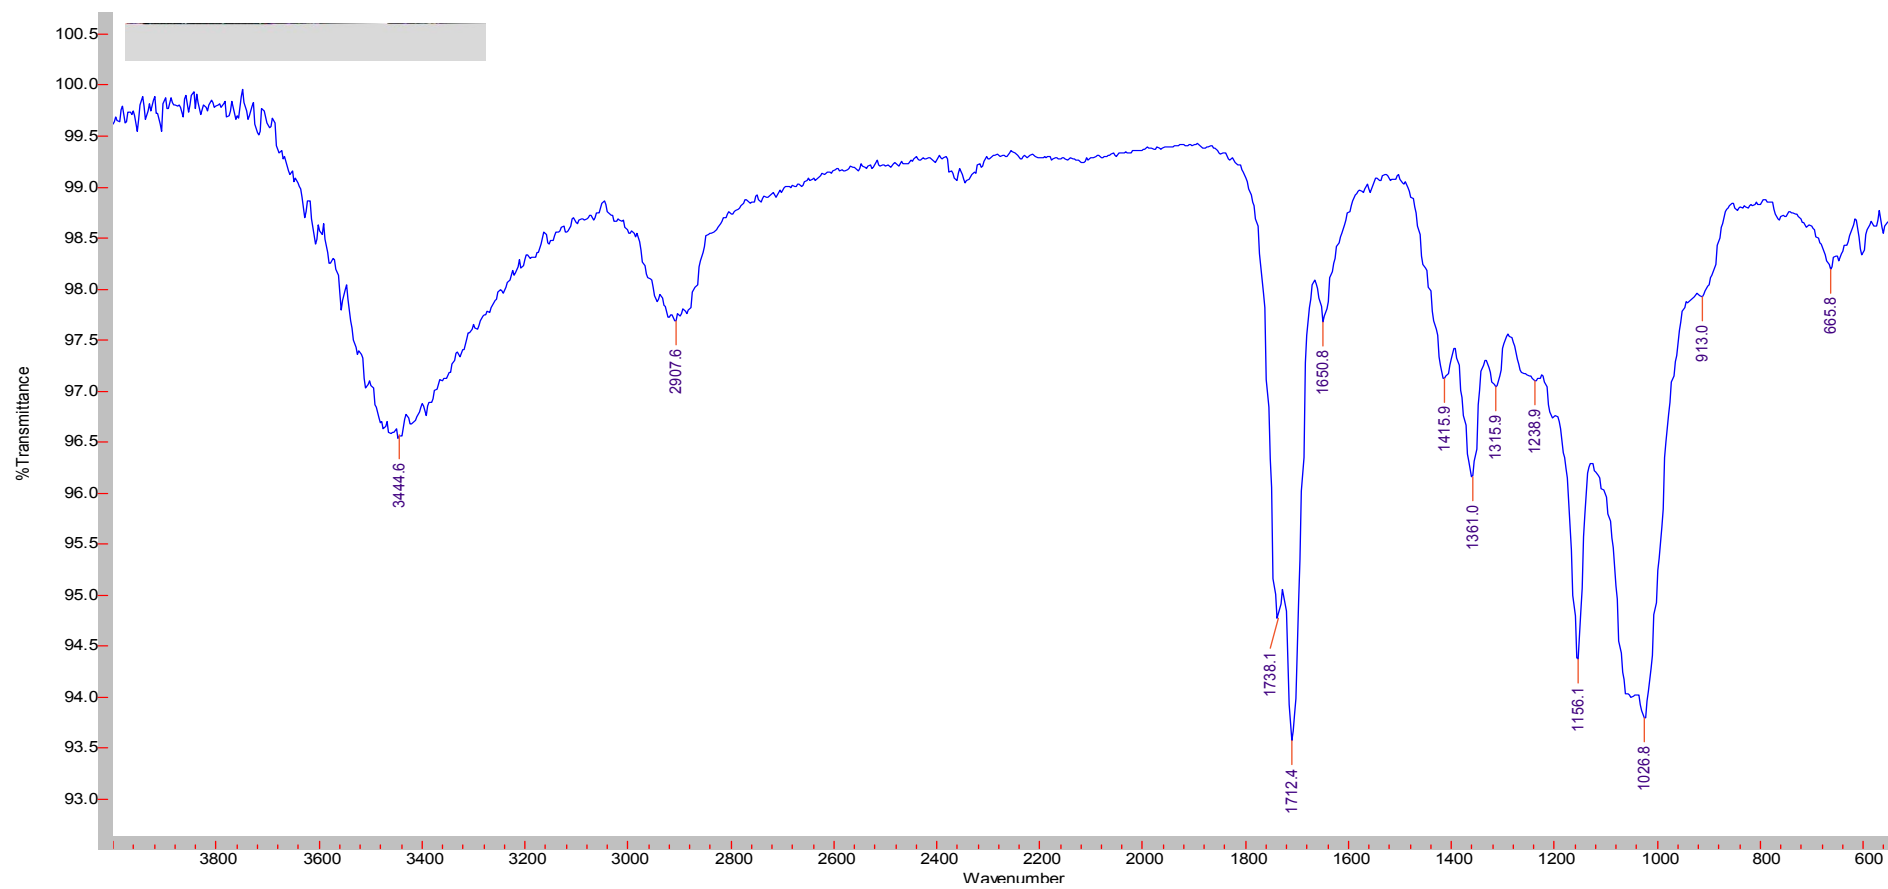

**Fig S31.** IR of cellulose levulinate from **DBUHLev**, 10 eq Lev<sub>2</sub>O, 25°C, 0.5 ml DMSO

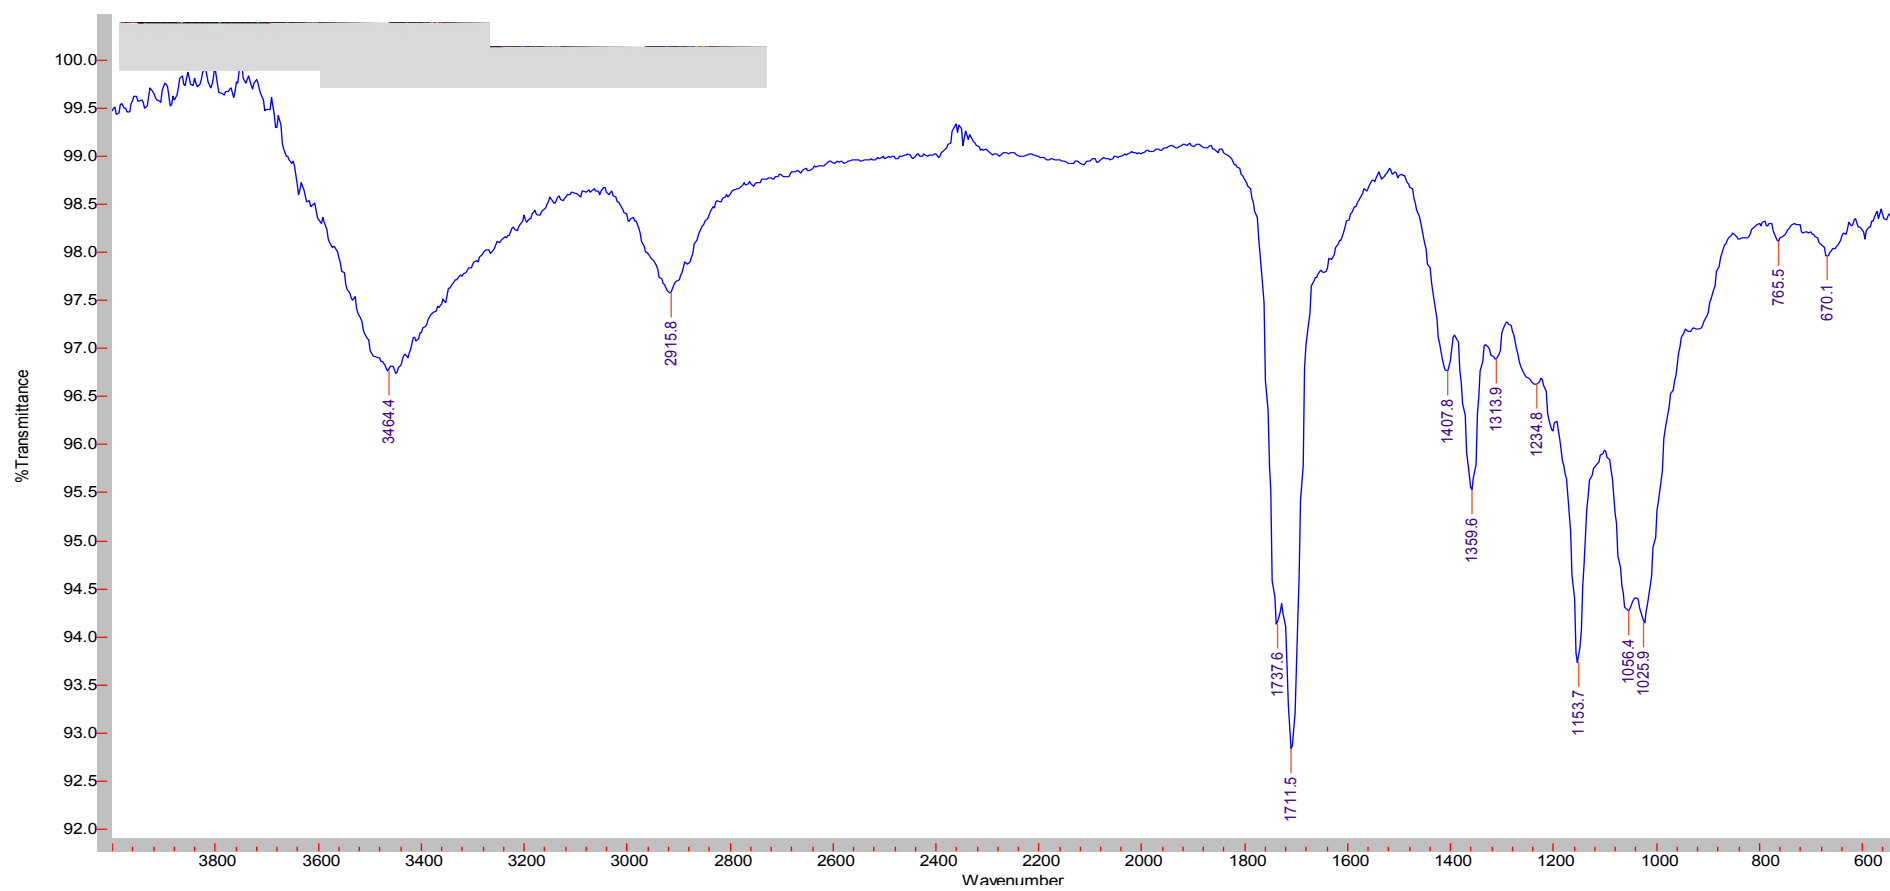

**Fig S32.** IR of cellulose levulinate from **DBUHLev**, 3 eq Lev<sub>2</sub>O, 80°C, 0.5 ml DMSO

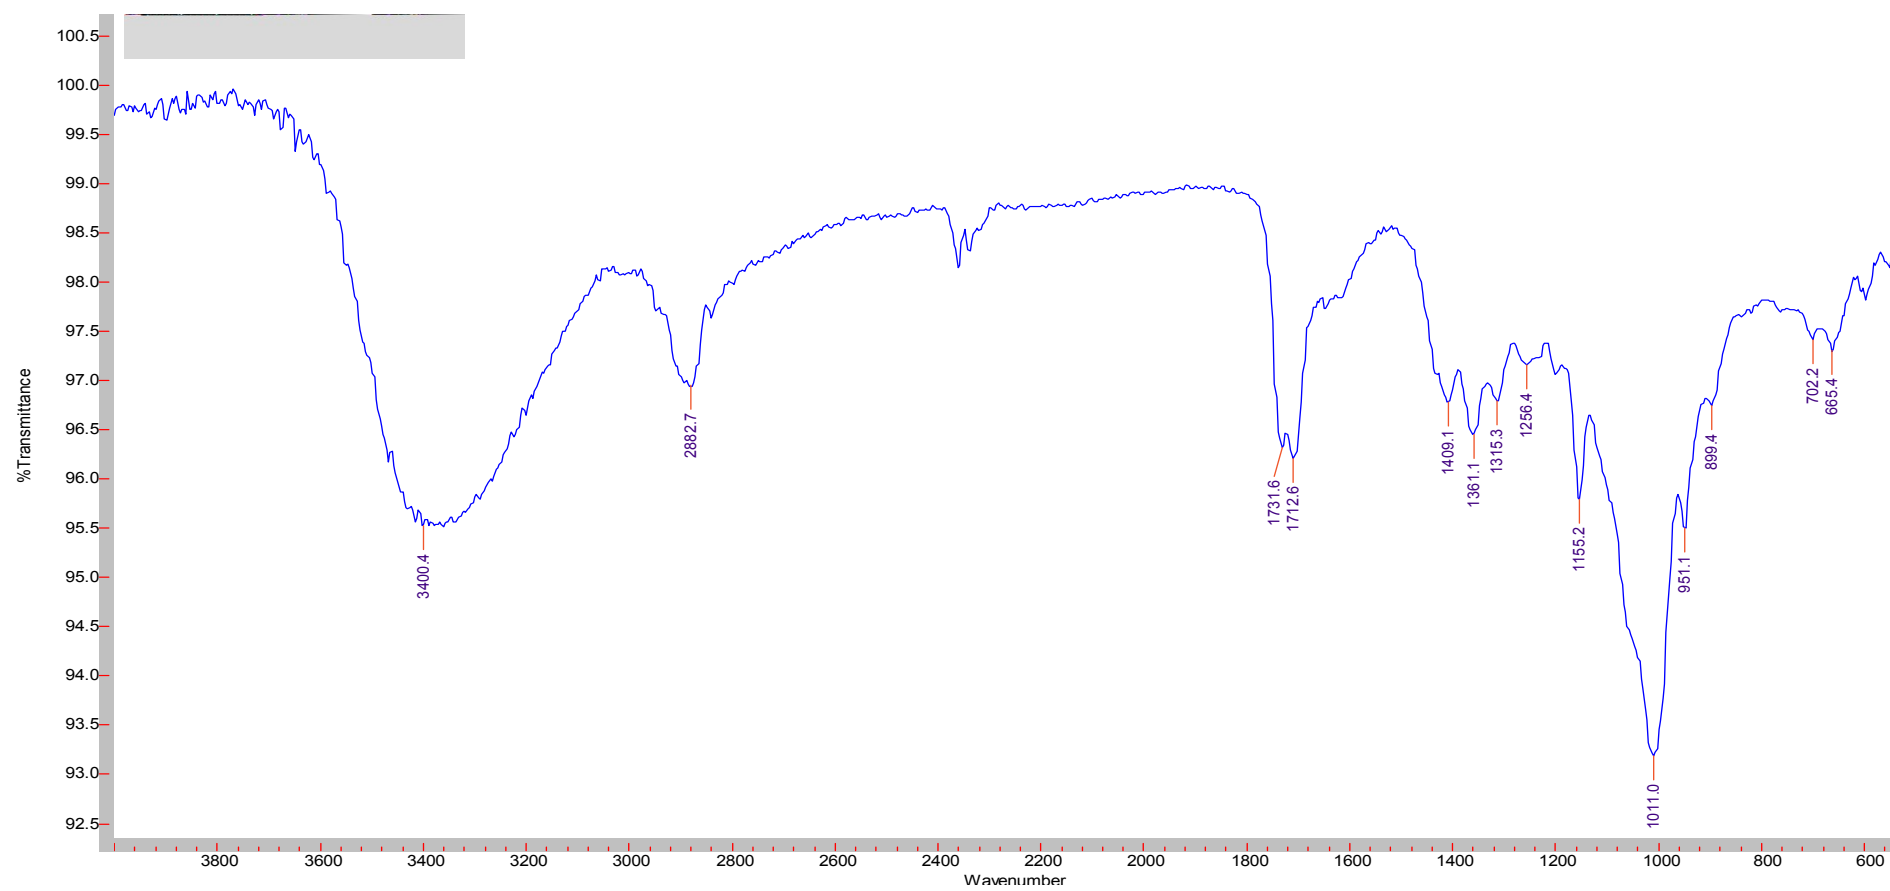



**Fig S33.** IR of cellulose levulinate from **DBUHLev**, 10eq Lev<sub>2</sub>O, 80°C, 3.5gr DMSO

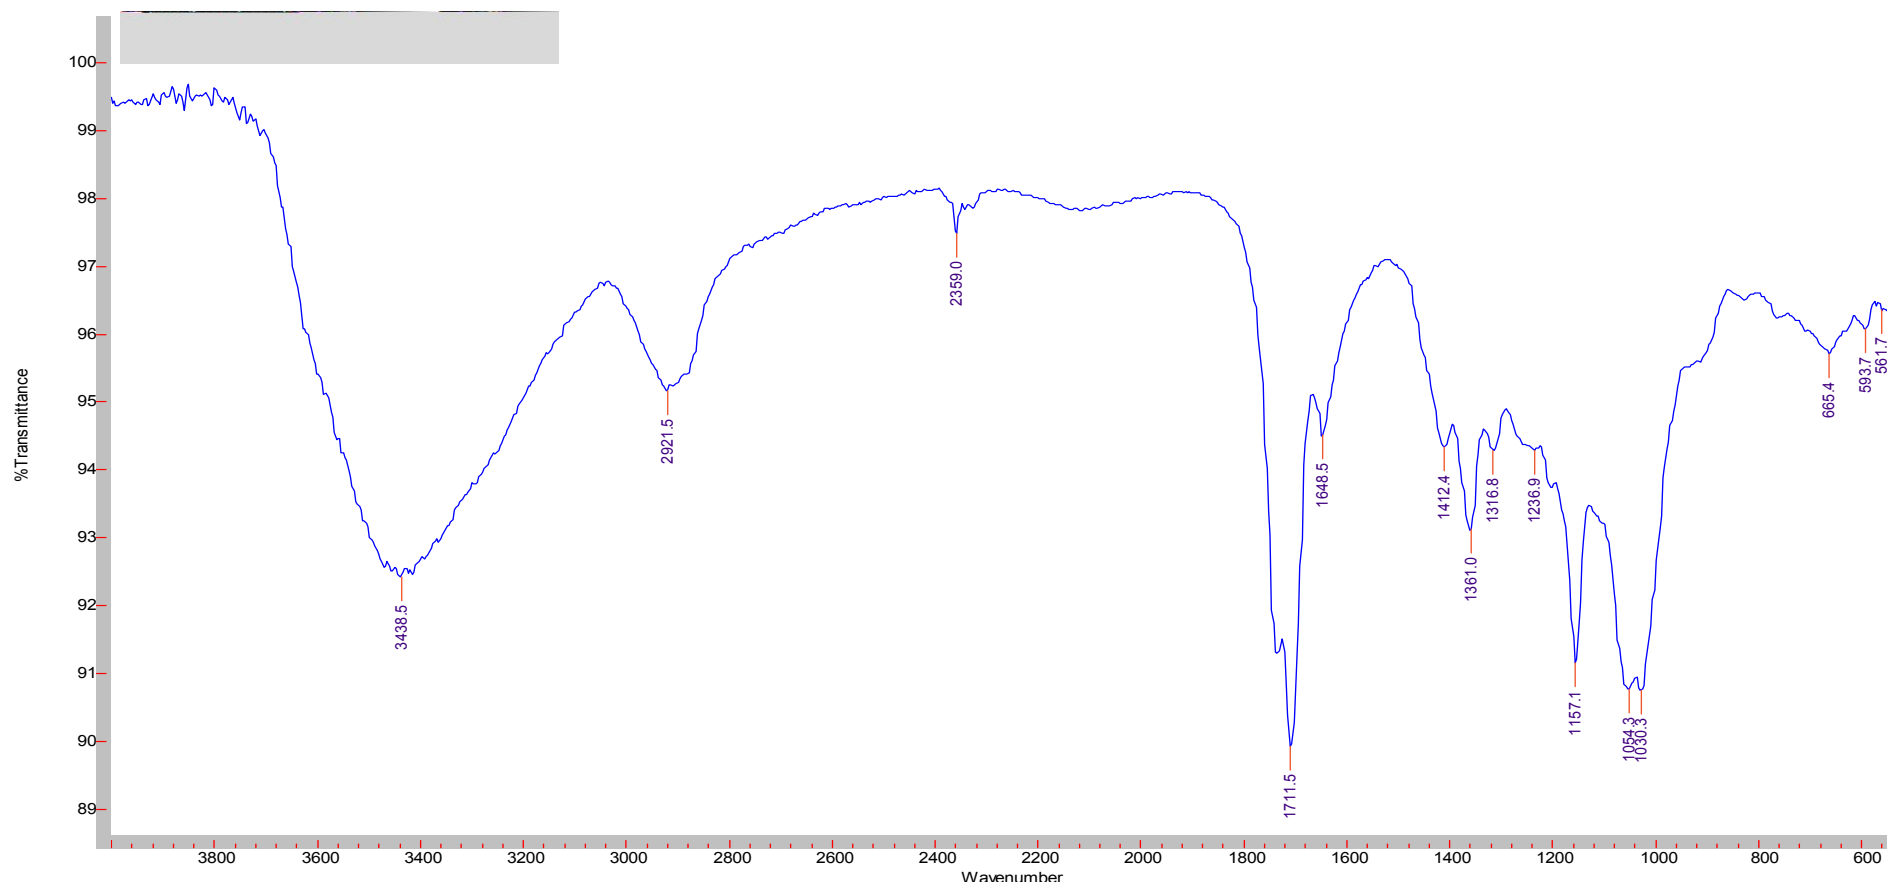

**Fig S34.**  $^1\text{H}$  NMR of propionyl-levulinyll cellulose from **DBNHLev**, 10 eq  $\text{Lev}_2\text{O}$ ,  $80^\circ\text{C}$ , 0.5 ml DMSO

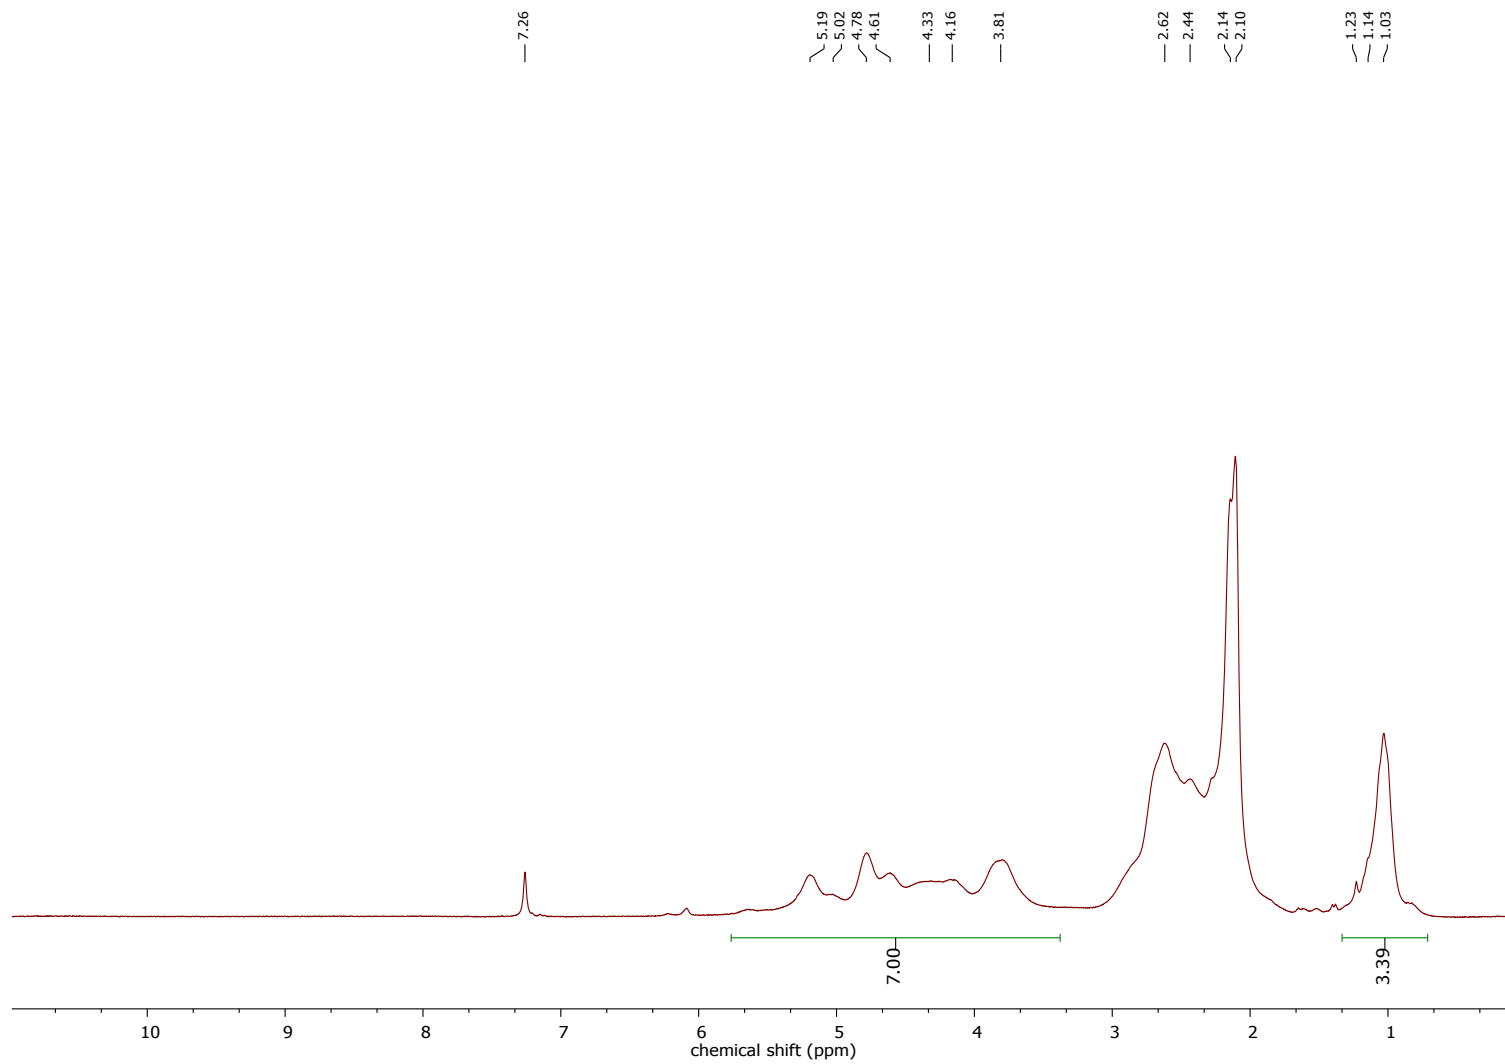

**Fig S35.**  $^1\text{H}$  NMR of propionyl-levulinyl cellulose from **DBNHLev**, 10 eq  $\text{Lev}_2\text{O}$ ,  $80^\circ\text{C}$ , 0.5 ml DMSO

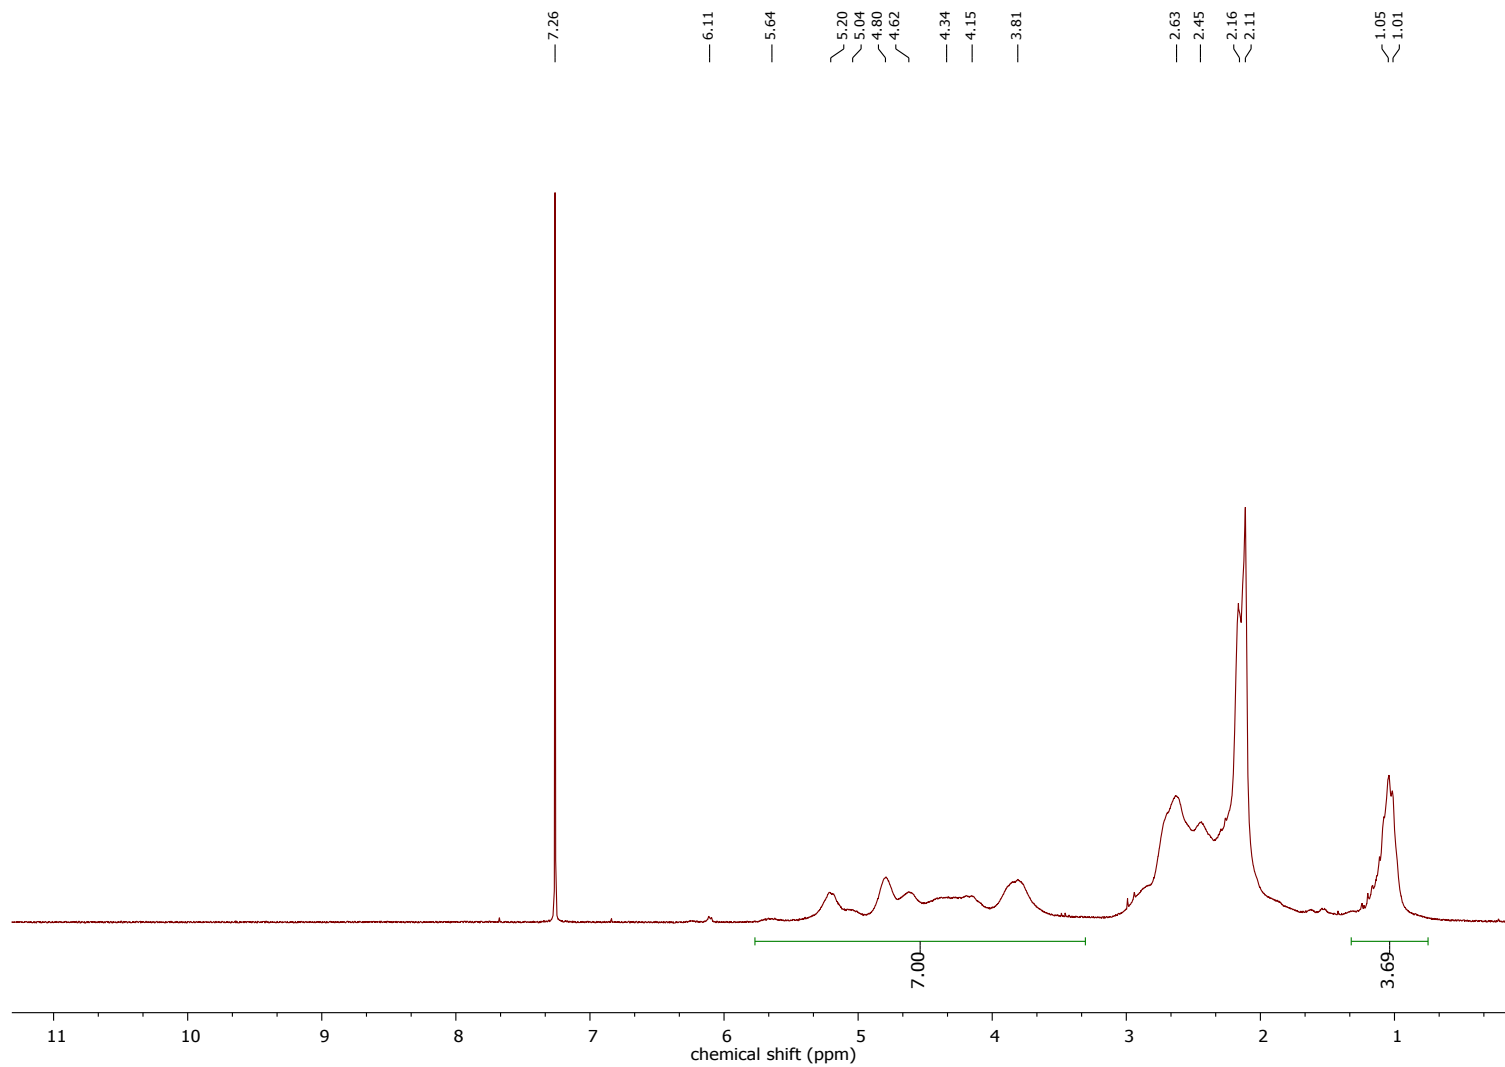

**Fig S36.**  $^1\text{H}$  NMR of propionyl-levulinyll cellulose from **DBNHLev**, 10 eq  $\text{Lev}_2\text{O}$ ,  $50^\circ\text{C}$ , 0.5 ml DMSO

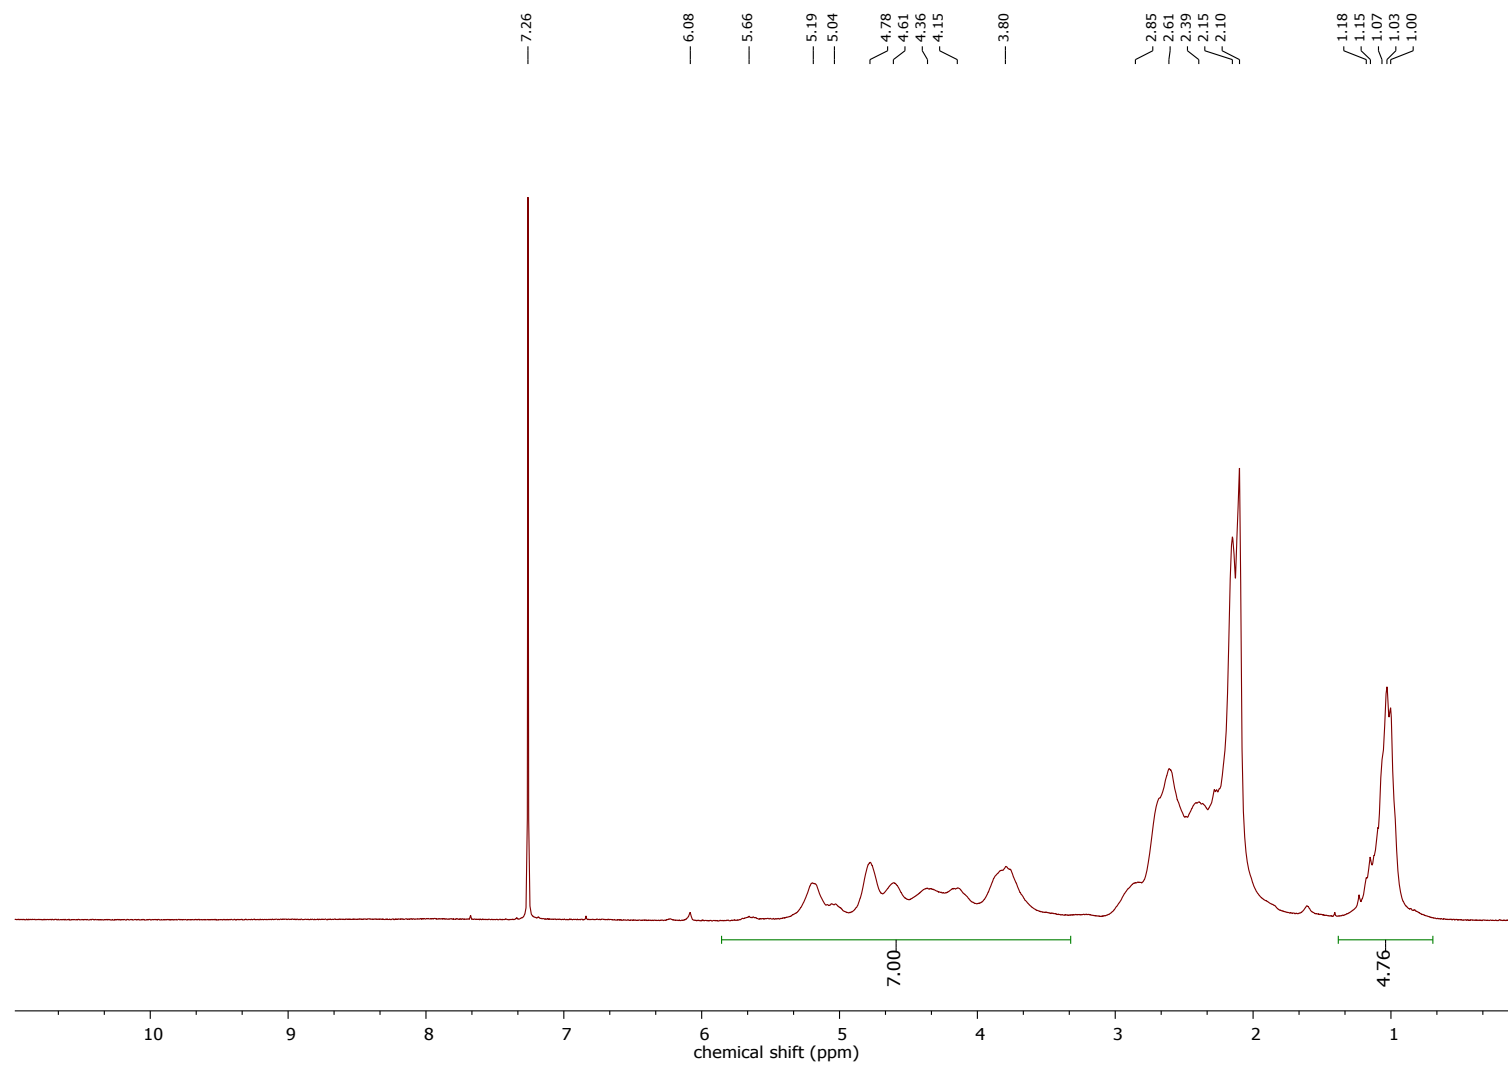

**Fig S37.**  $^1\text{H}$  NMR of propionyl-levulinyll cellulose from **DBNHLev**, 10 eq  $\text{Lev}_2\text{O}$ ,  $25^\circ\text{C}$ , 0.5 ml DMSO

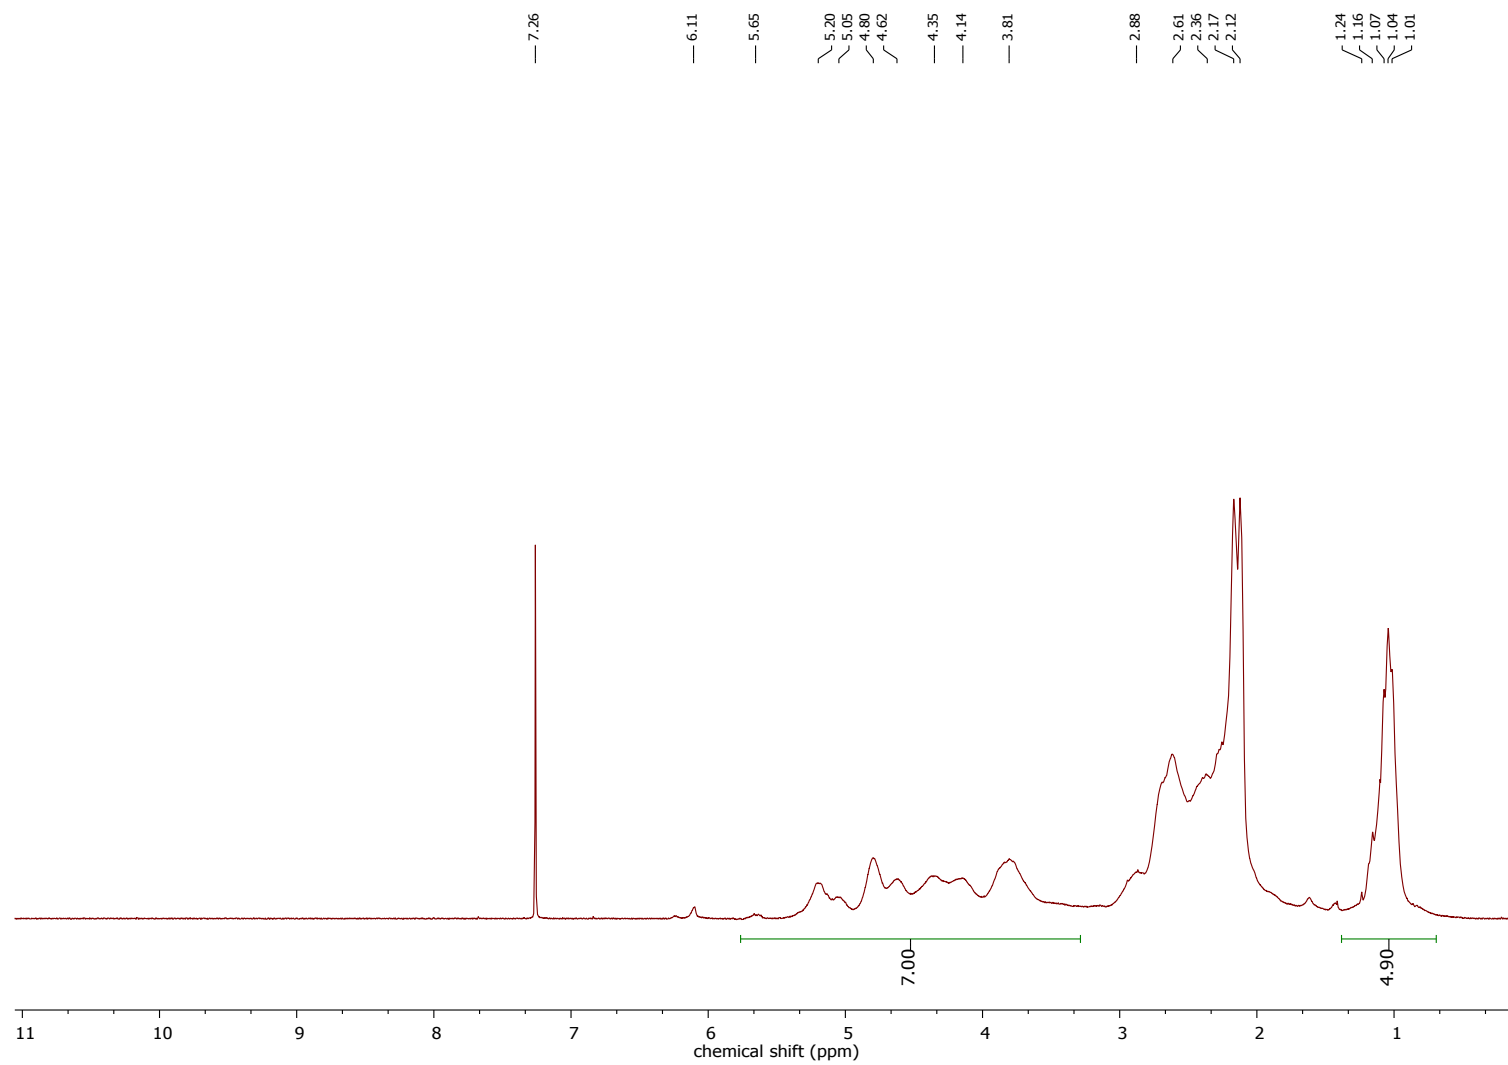

**Fig S38.**  $^1\text{H}$  NMR of propionyl-levulinyl cellulose from **DBNHLev**, 3 eq  $\text{Lev}_2\text{O}$ ,  $80^\circ\text{C}$ , 0.5 ml DMSO

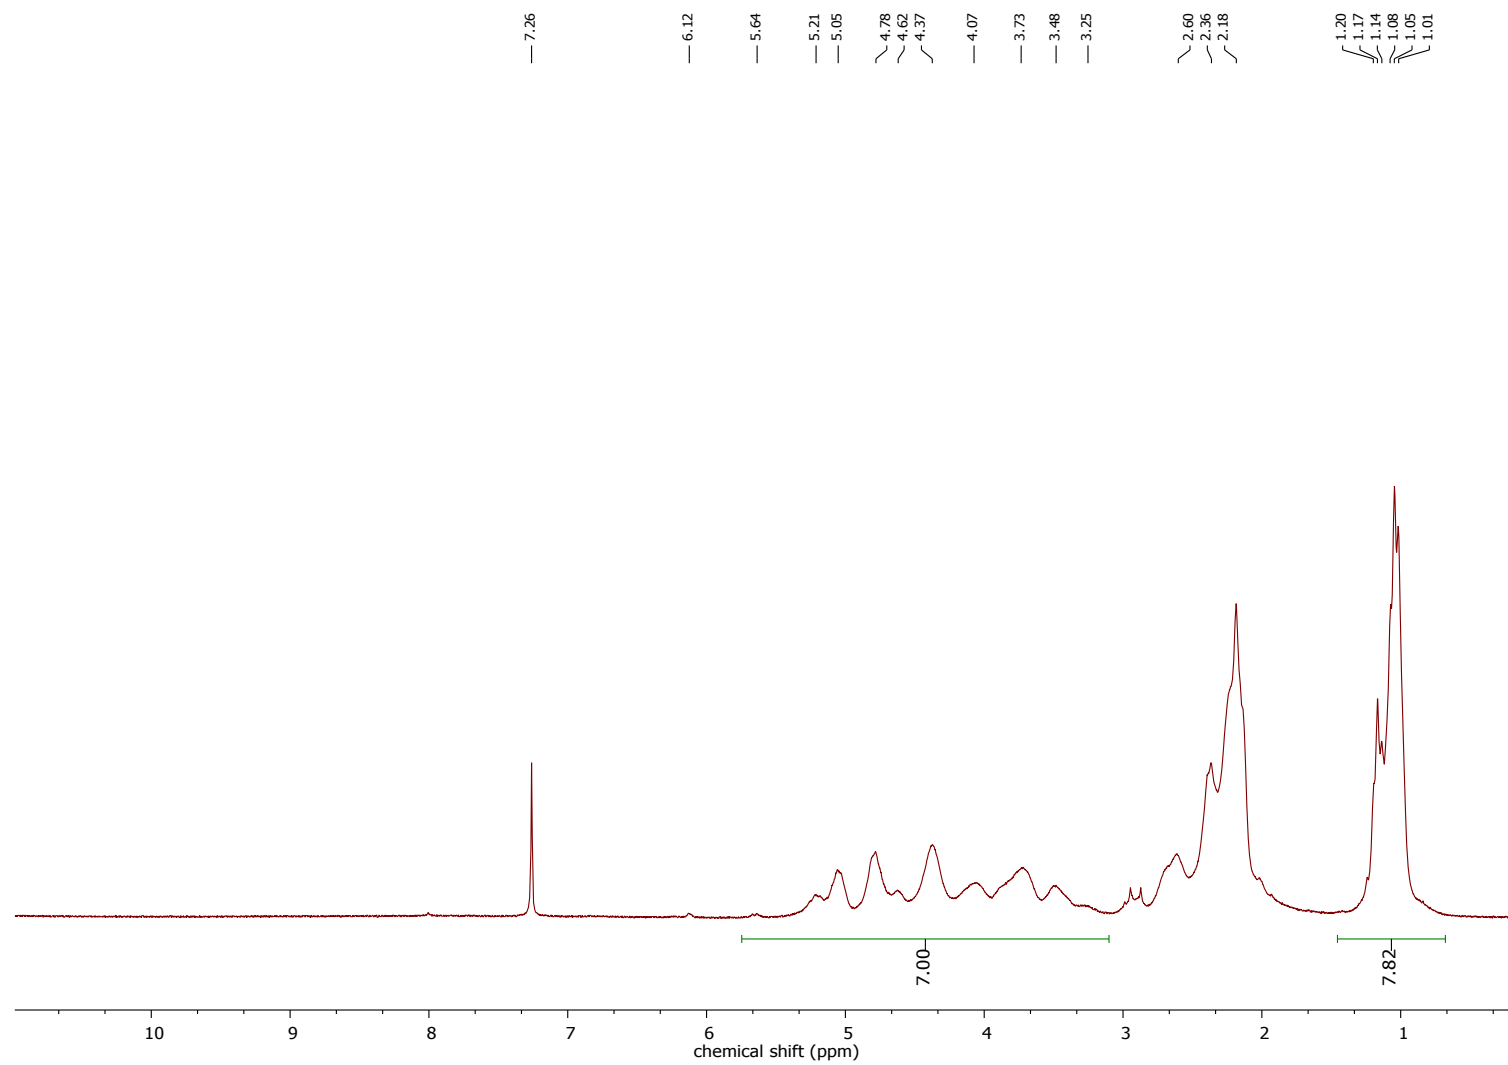

**Fig S39.**  $^1\text{H}$  NMR of propionyl-levulinyl cellulose from **DBNHLev**, 20 eq  $\text{Lev}_2\text{O}$ ,  $80^\circ\text{C}$ , 0.5 ml  $\gamma$ -valerolactone

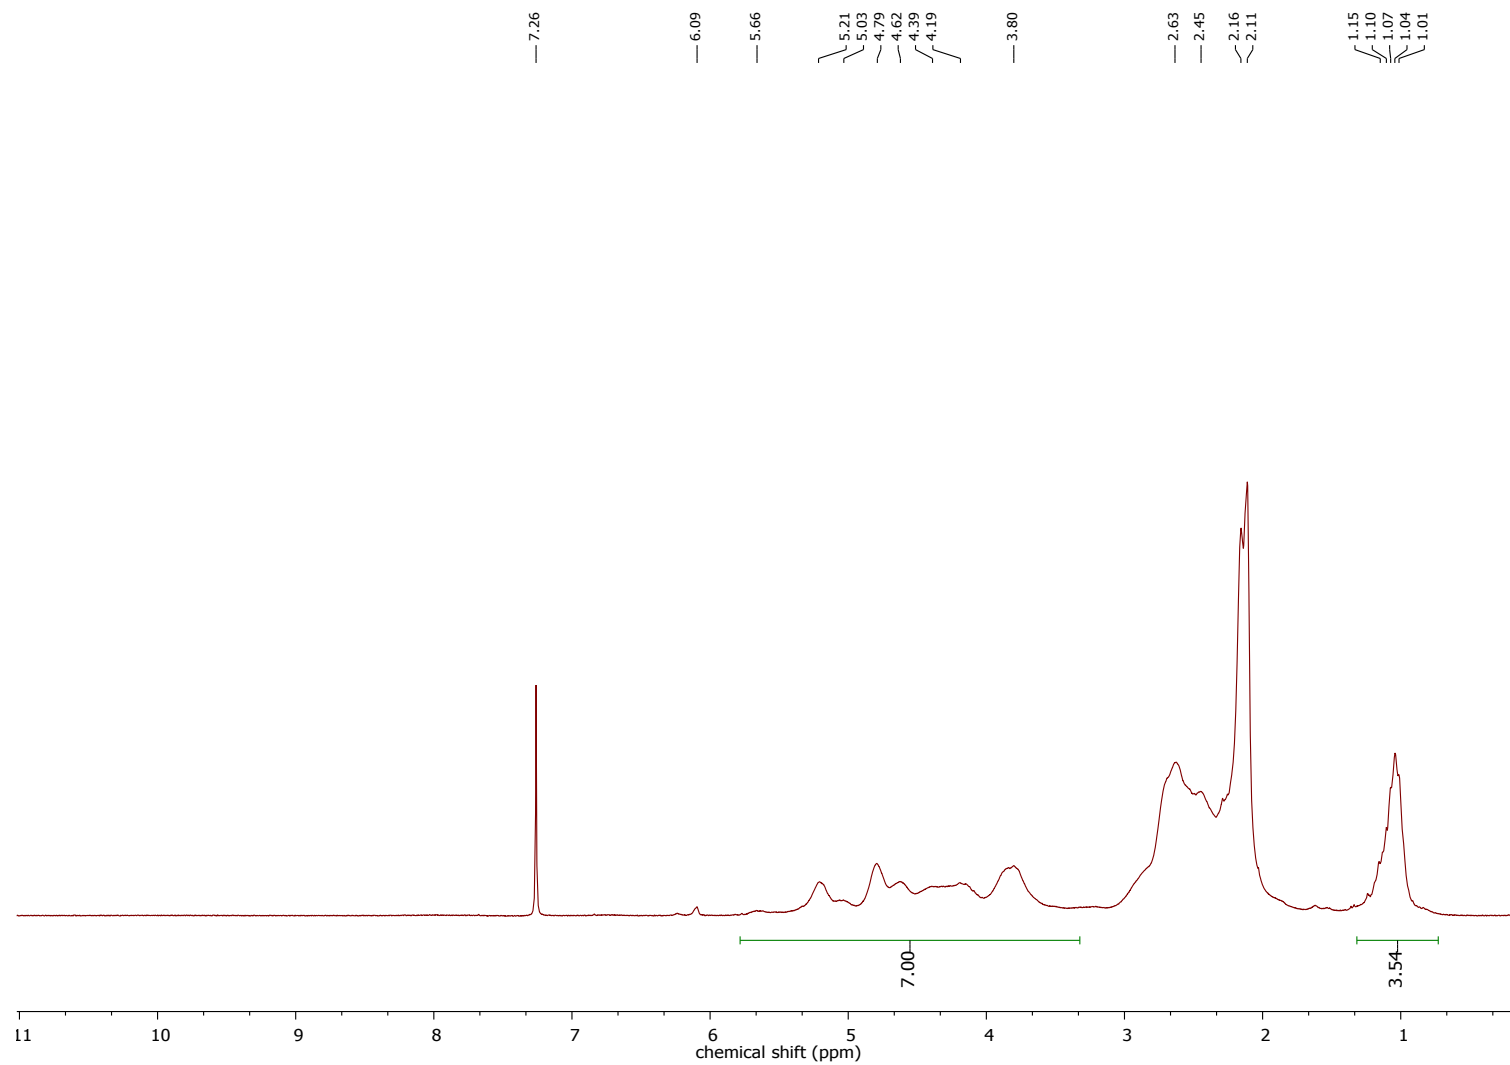

**Fig S40.**  $^1\text{H}$  NMR of propionyl-levulinyl cellulose from **DBNHLev**, 10 eq  $\text{Lev}_2\text{O}$ ,  $80^\circ\text{C}$ , 0.5 ml  $\gamma$ -valerolactone

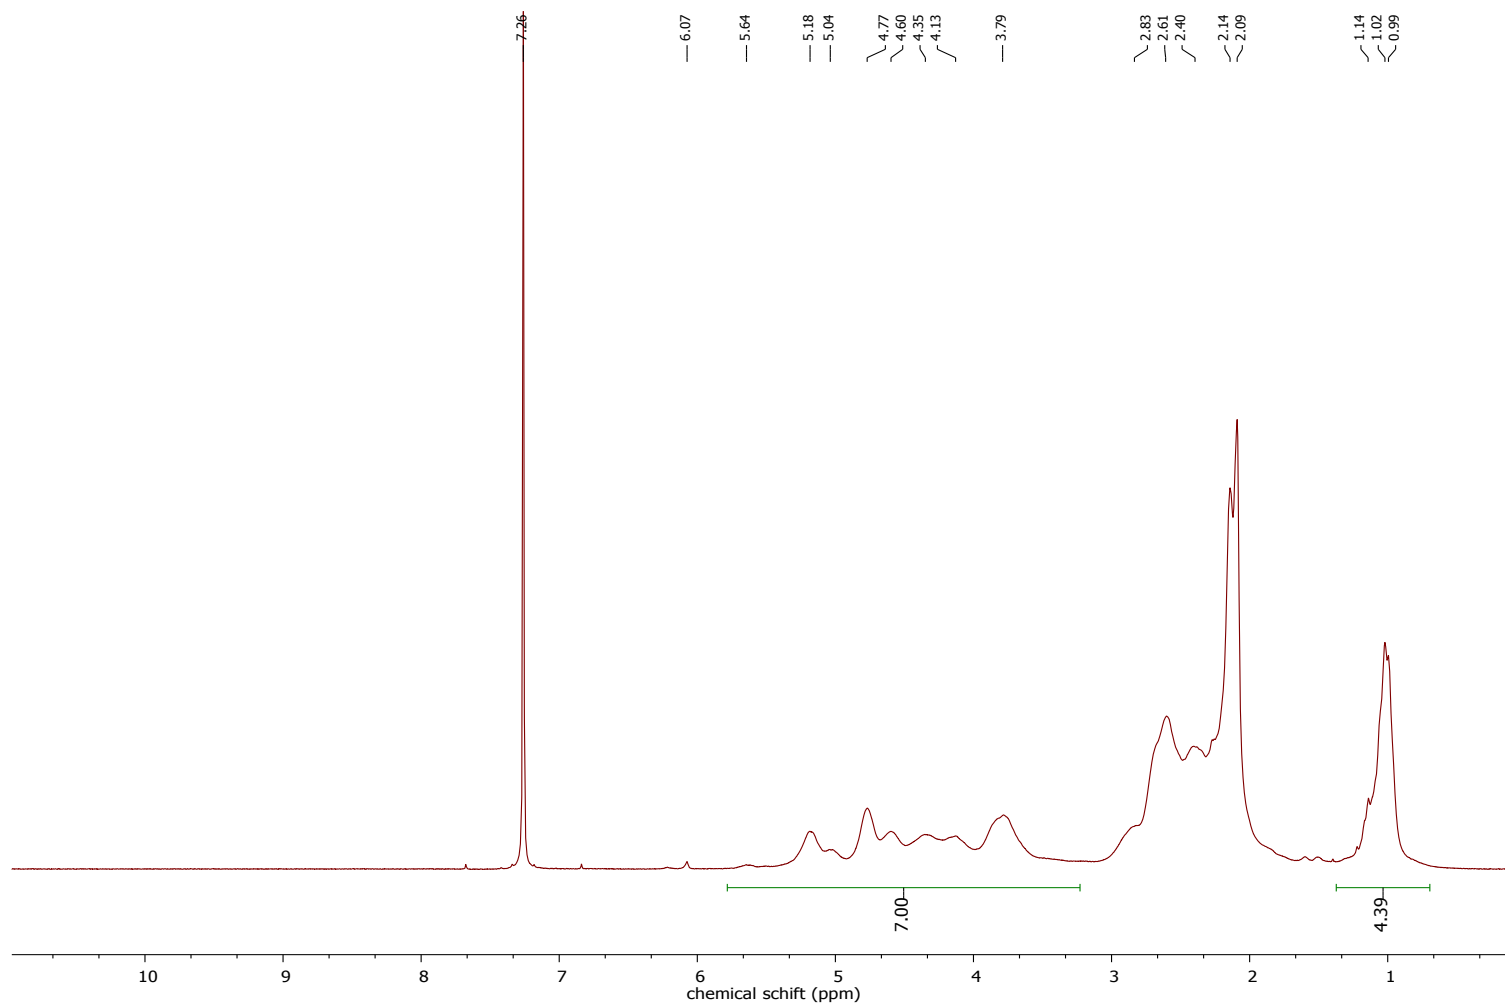



**Fig S41.**  $^1\text{H}$  NMR of propionyl-levulinyll cellulose from **DBNHLev**, 10 eq  $\text{Lev}_2\text{O}$ ,  $50^\circ\text{C}$ , 0.5 ml  $\gamma$ - valerolactone

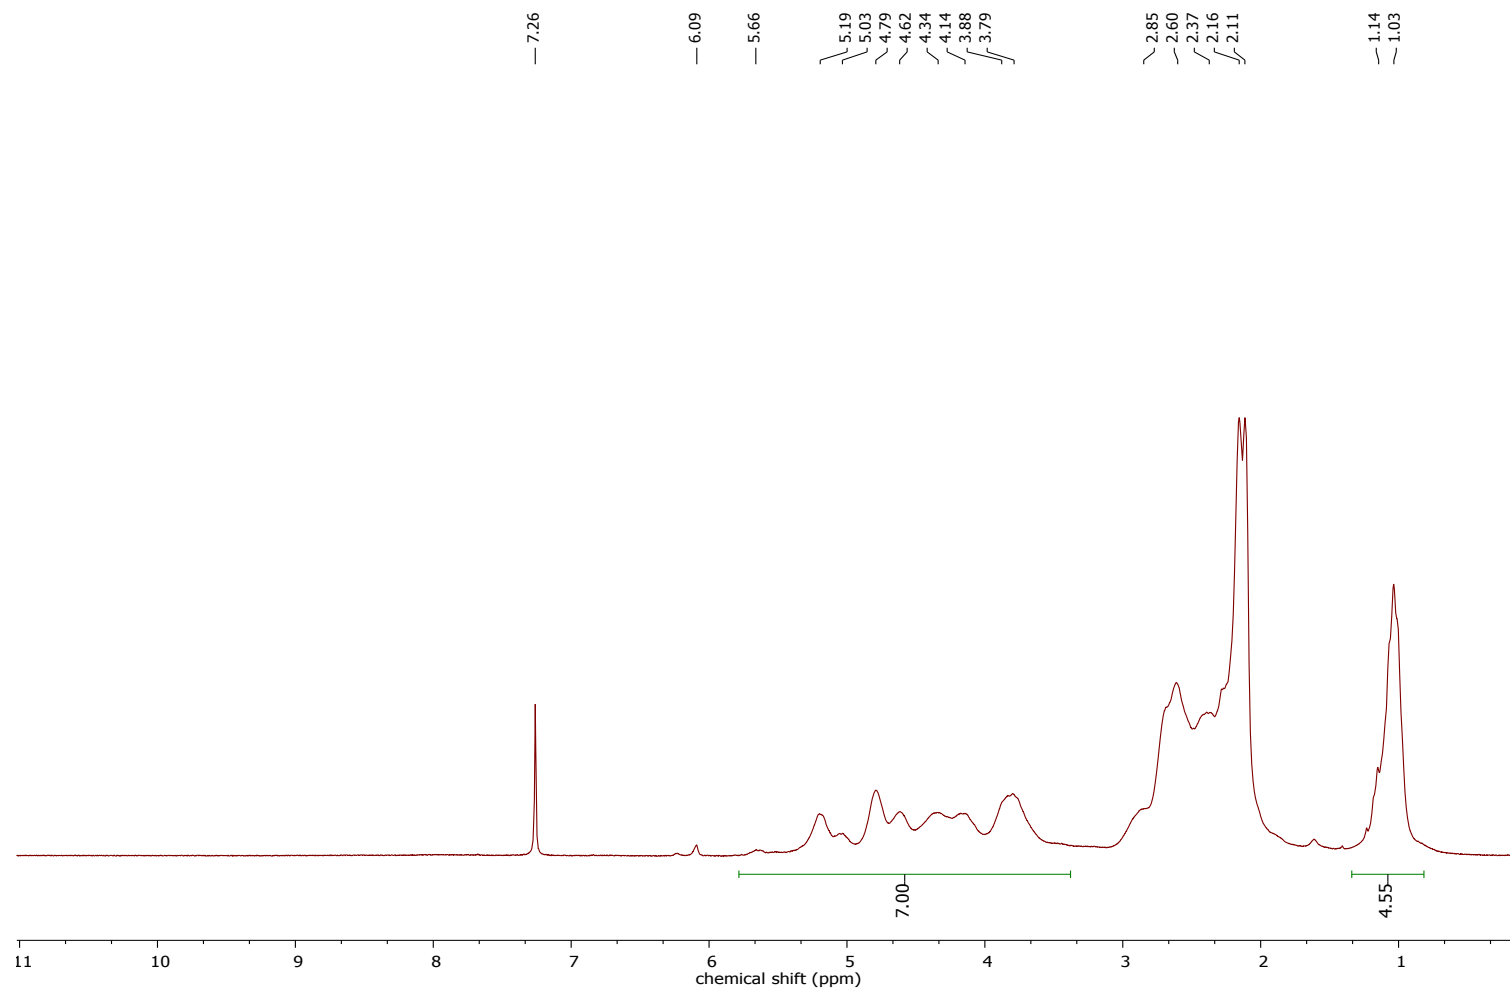

**Fig S42.**  $^1\text{H}$  NMR of propionyl-levulinyl cellulose from **DBNHLev**, 10 eq  $\text{Lev}_2\text{O}$ ,  $25^\circ\text{C}$ , 0.5 ml  $\gamma$ -valerolactone

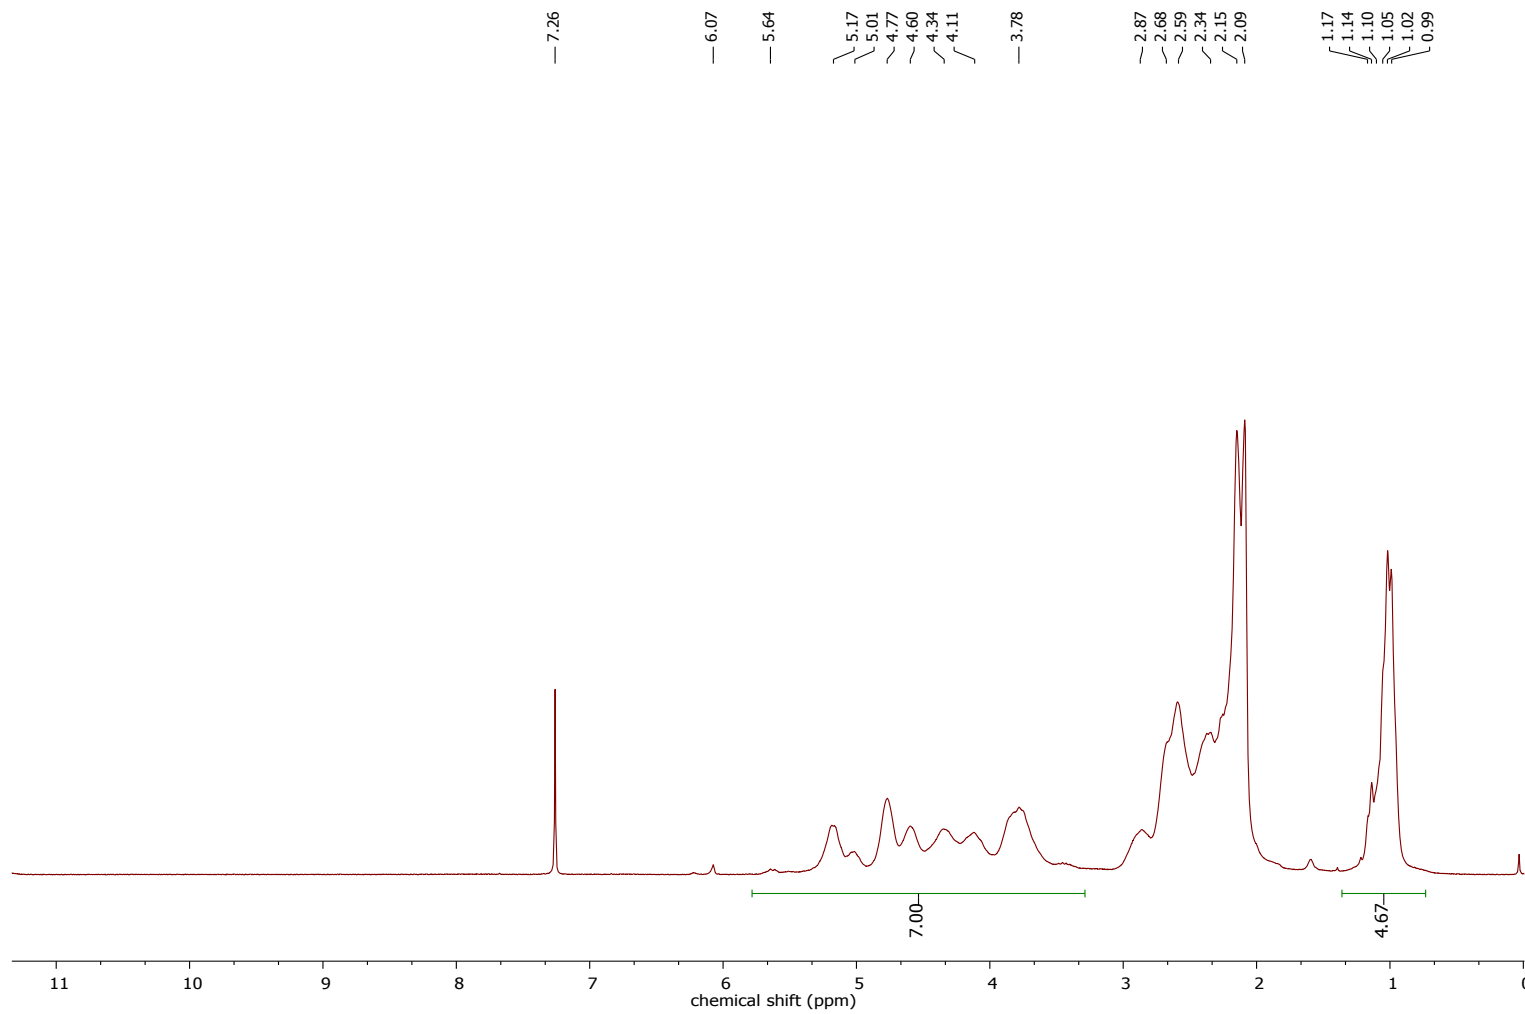

**Fig S43.**  $^1\text{H}$  NMR of propionyl-levulinyl cellulose from **DBNHLev**, 10eq  $\text{Lev}_2\text{O}$ ,  $80^\circ\text{C}$ , 3.5gr DMSO

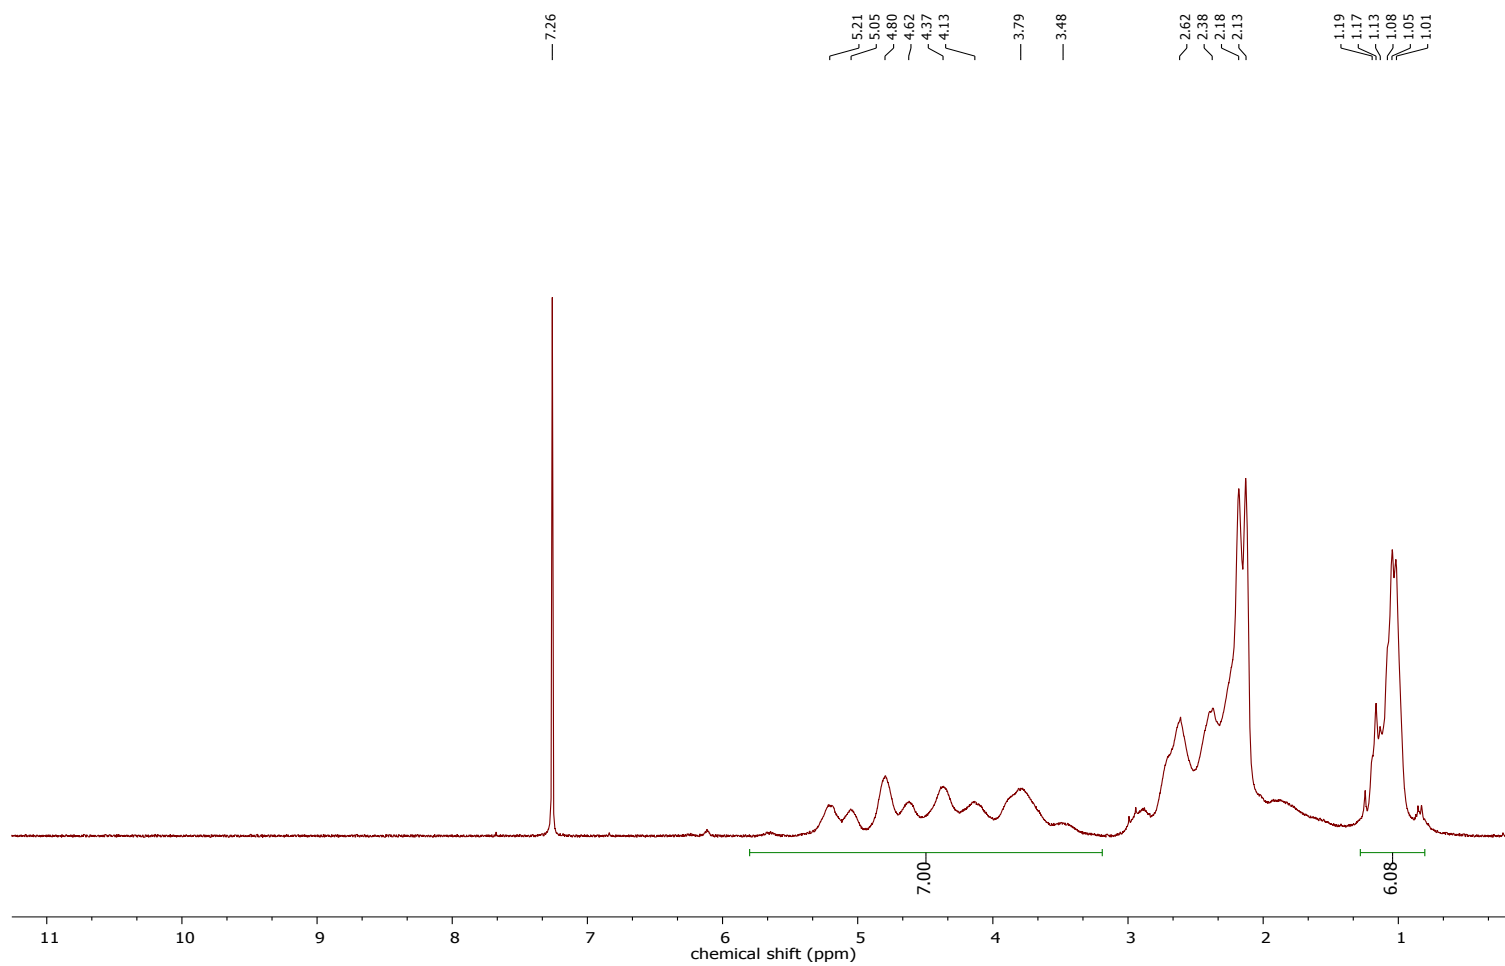

**Fig S44.**  $^1\text{H}$  NMR of propionyl-levulinyll cellulose from **DBUHLev**, 20 eq  $\text{Lev}_2\text{O}$ ,  $80^\circ\text{C}$ , 0.5 ml DMSO

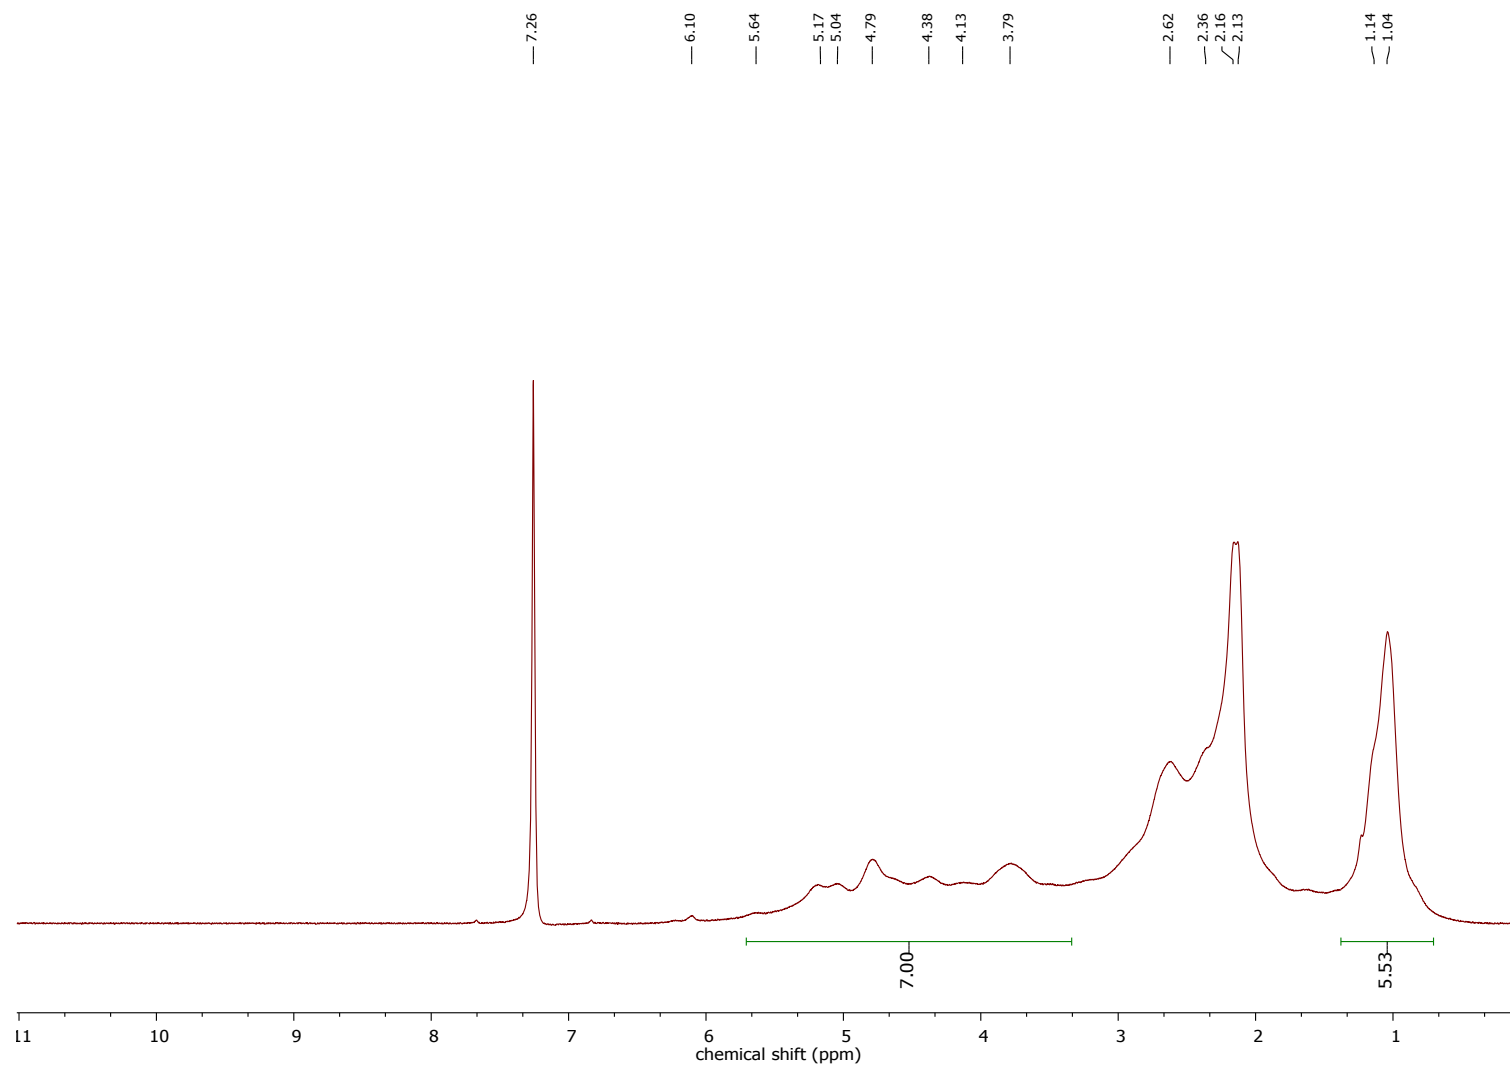

**Fig S45.**  $^1\text{H}$  NMR of propionyl-levulinyll cellulose from **DBUHLev**, 10 eq  $\text{Lev}_2\text{O}$ ,  $80^\circ\text{C}$ , 0.5 ml DMSO

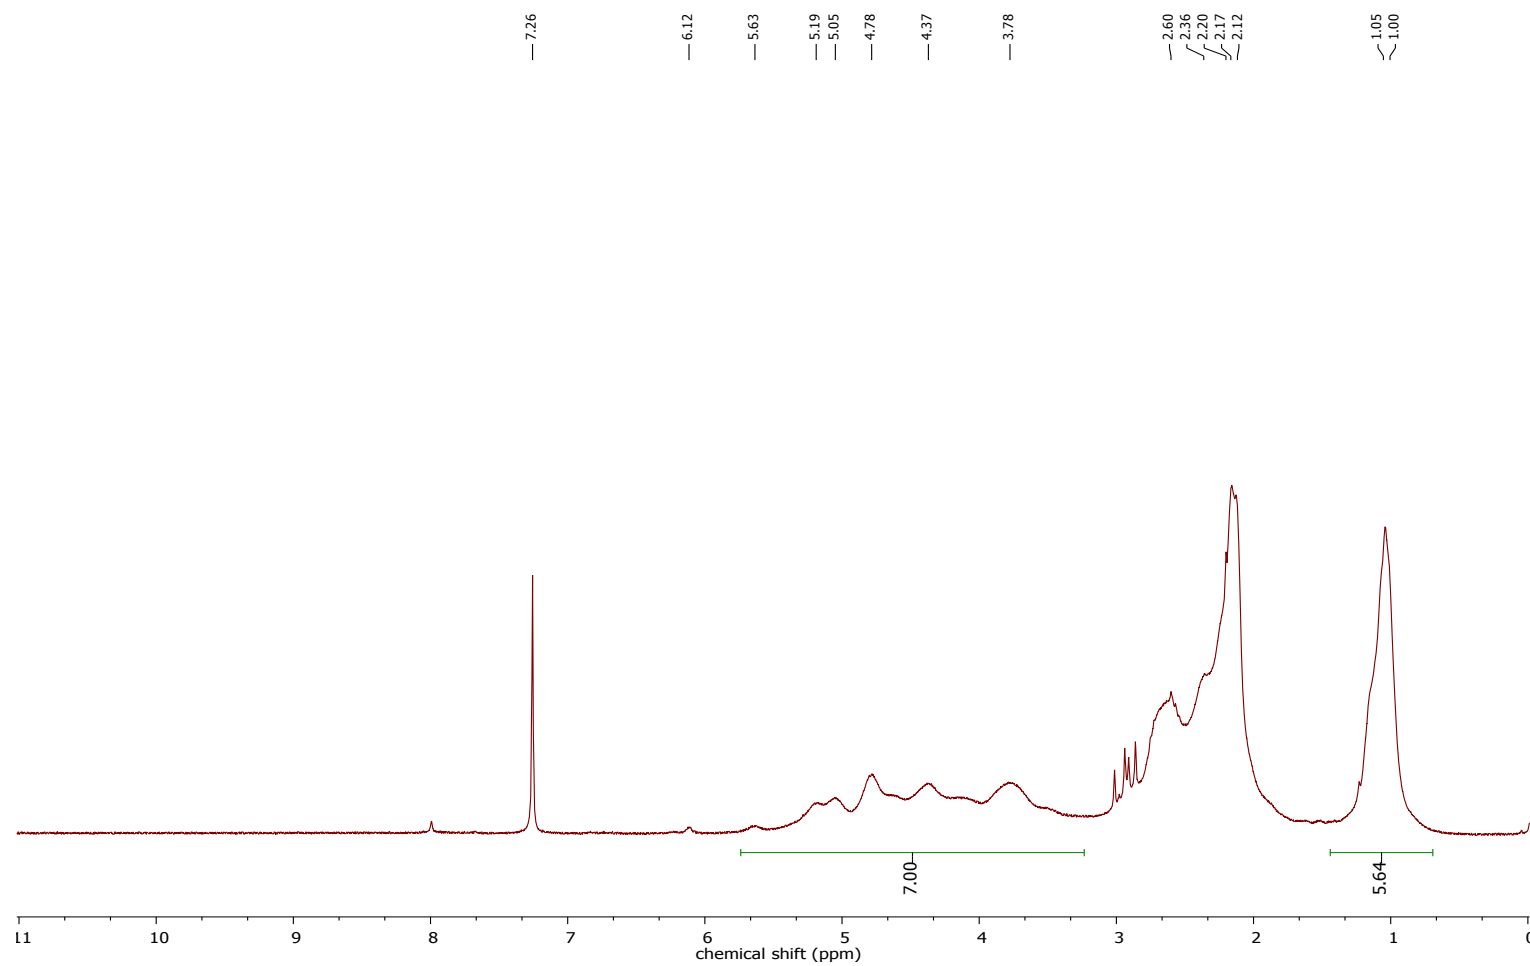

**Fig S46.**  $^1\text{H}$  NMR of propionyl-levulinyll cellulose from **DBUHLev**, 10 eq  $\text{Lev}_2\text{O}$ ,  $50^\circ\text{C}$ , 0.5 ml DMSO

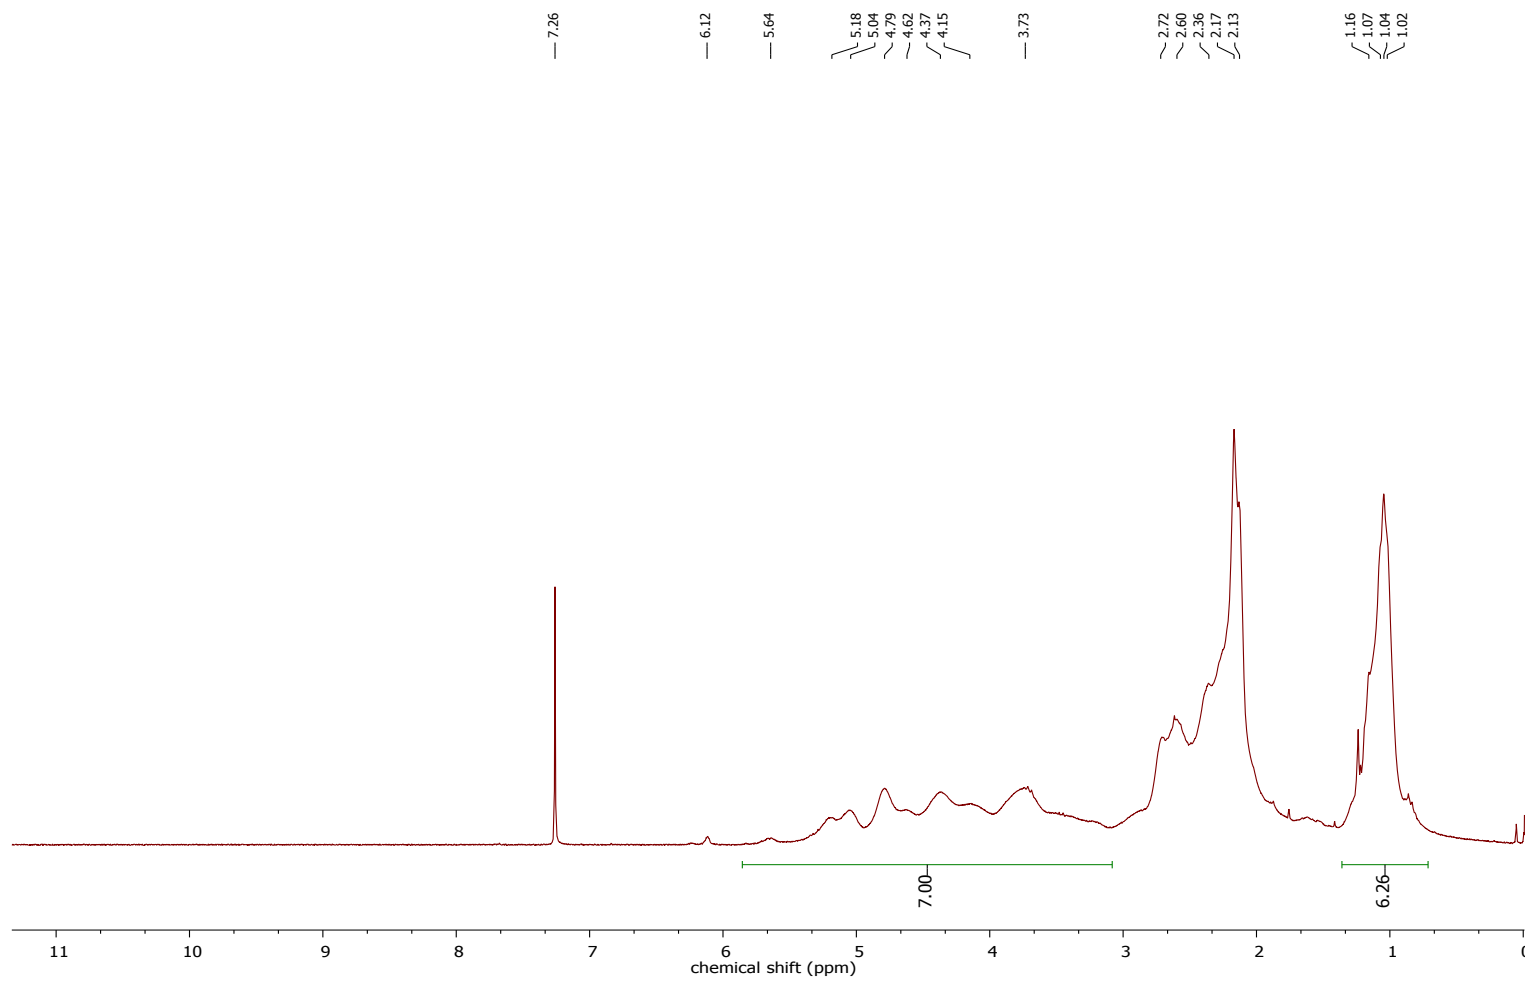

**Fig S47.**  $^1\text{H}$  NMR of propionyl-levulinyll cellulose from **DBUHLev**, 10 eq  $\text{Lev}_2\text{O}$ ,  $25^\circ\text{C}$ , 0.5 ml DMSO

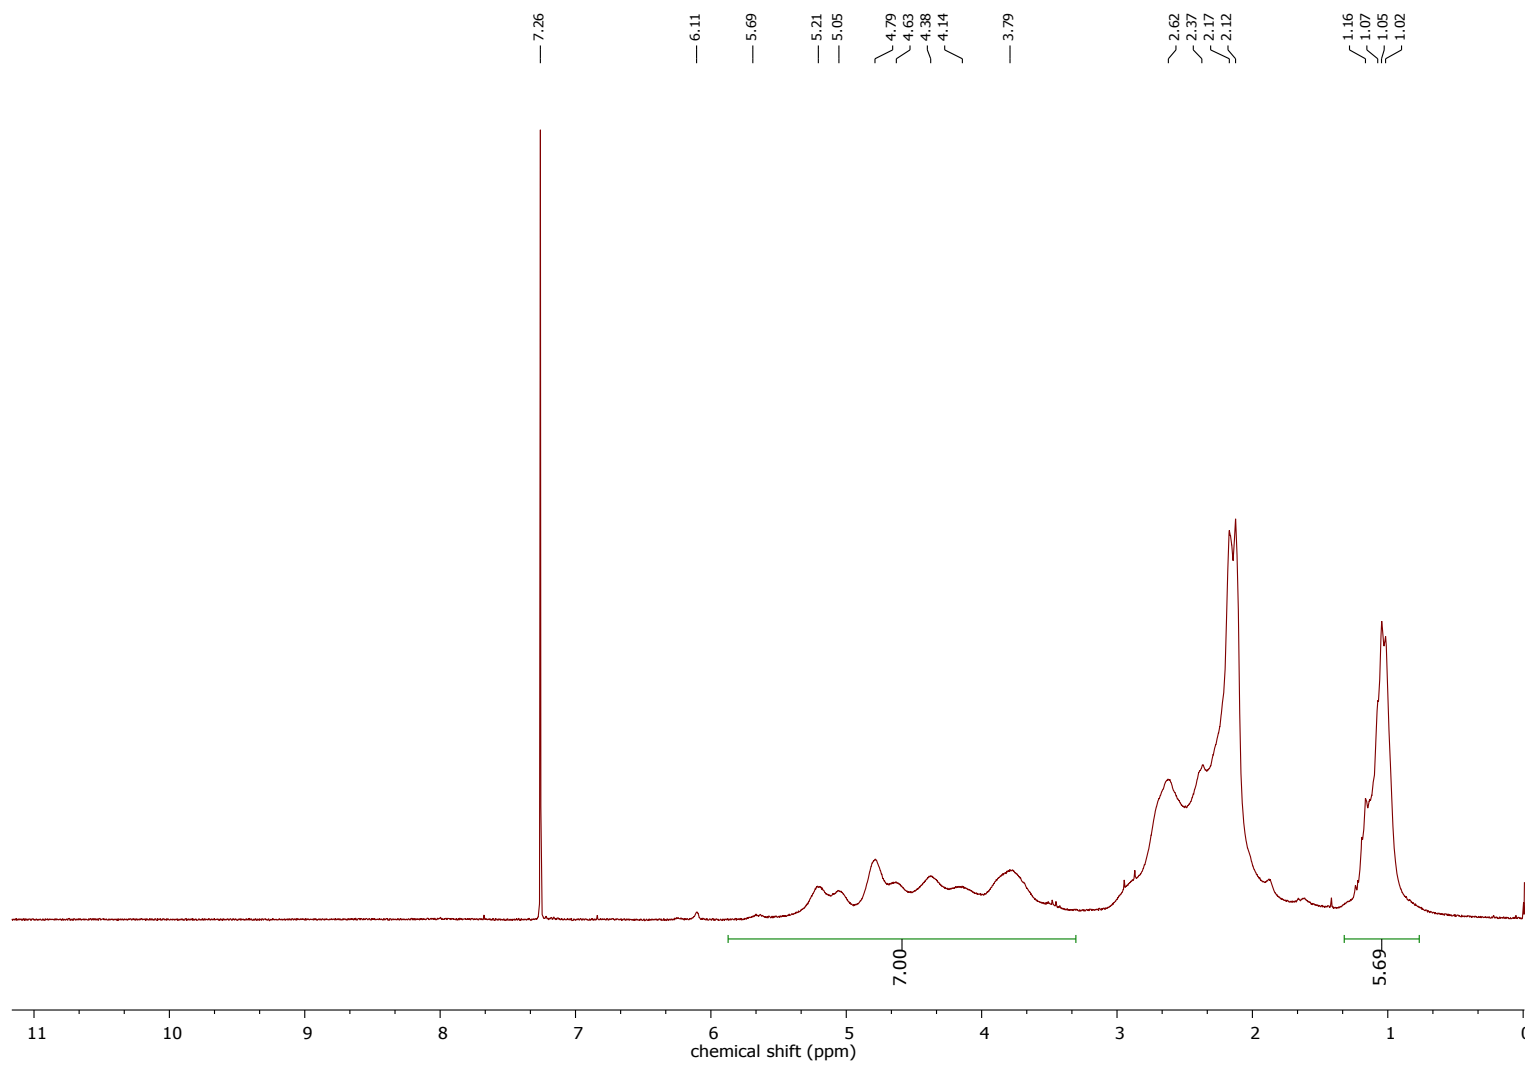

Fig S48.  $^1\text{H}$  NMR of propionyl-levulinyl cellulose from **DBUHLev**, 3 eq Lev<sub>2</sub>O, 80°C, 0.5 ml DMSO

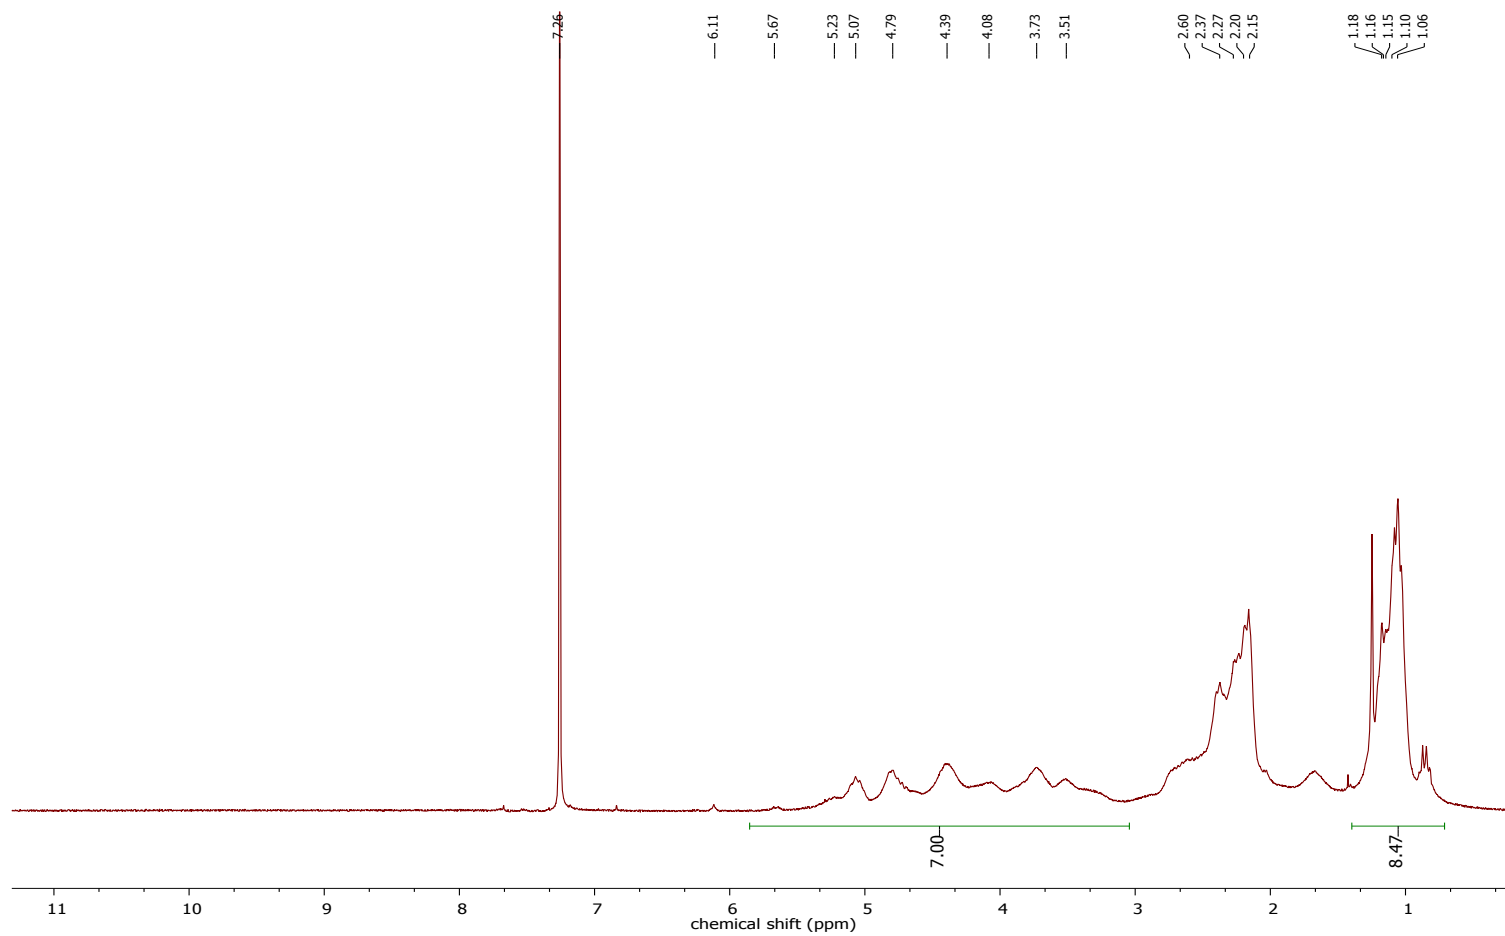



**Fig S49.**  $^1\text{H}$  NMR of propionyl-levulinyl cellulose from **DBUHLev**, 10eq Lev<sub>2</sub>O, 80°C, 3.5gr DMSO

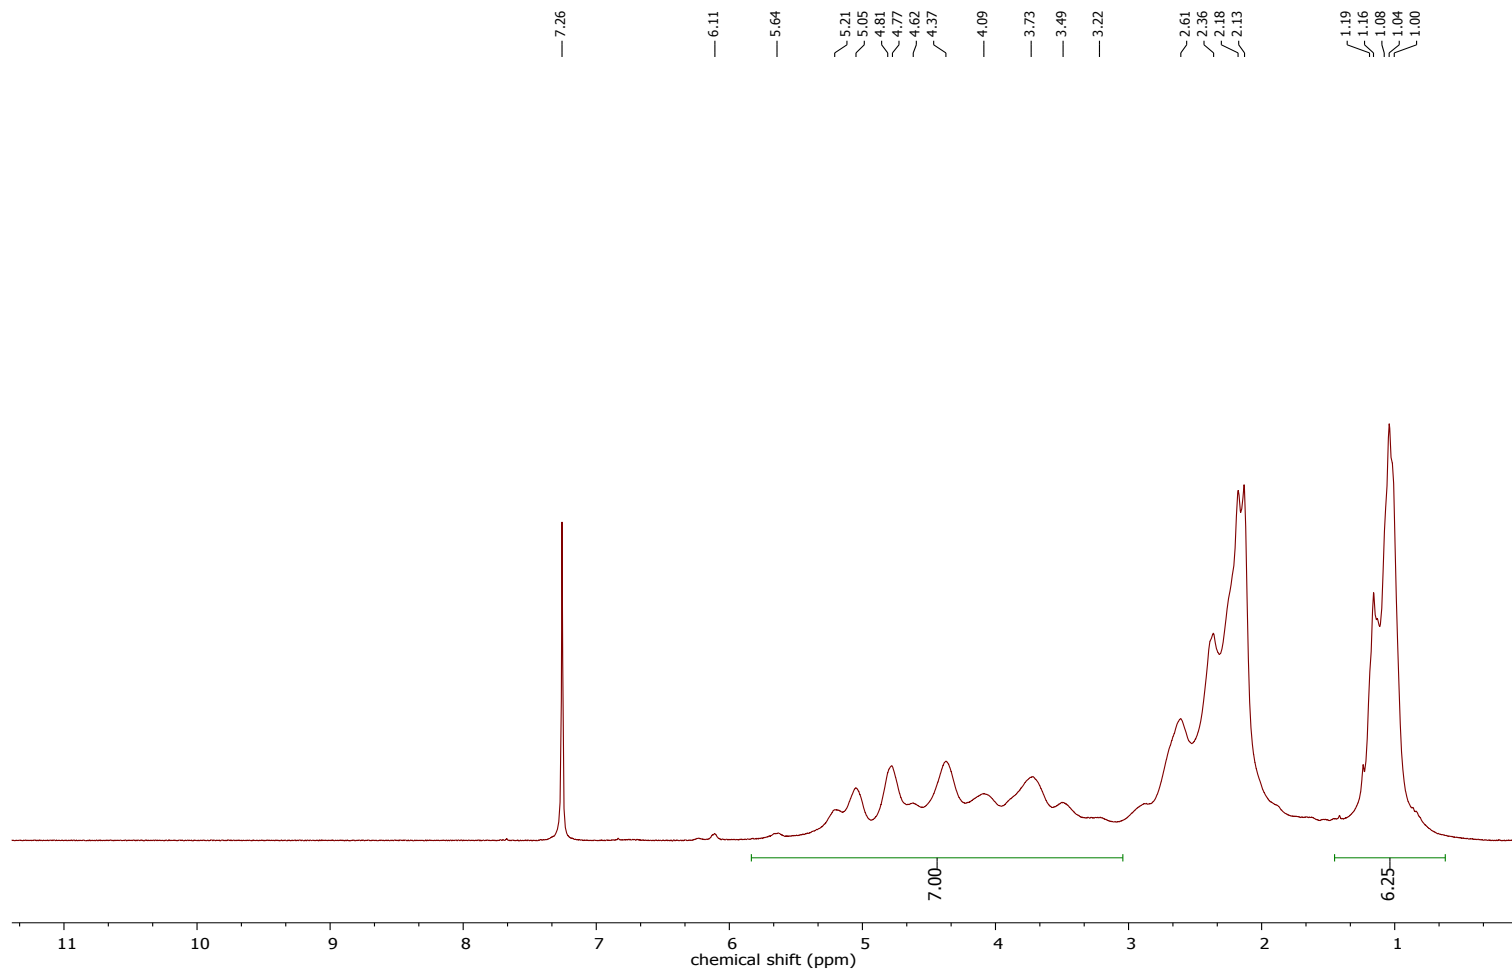

Supplement: c9nj00191c1.pdf [file c9nj00191c1.pdf]
